# Supplementary material for: Basic enemies of photochromism: irreversible transformation of fluorinated diarylethenes to polyenic enamines and enols
Source: Royal Society of Chemistry journal article supplement (doi:10.1039/d0pp00292e), 2020-10-15
Supplement: d0pp00292e1.pdf [file d0pp00292e1.pdf]

# Basic enemies of photochromism: irreversible transformation of fluorinated diarylethenes to polyenic enamines and enols

Dmytro Sysoiev<sup>1,2</sup> and Thomas Huhn<sup>2\*</sup>

<sup>1</sup> Fachbereich Chemie, Universität Konstanz, Universitätsstr. 10, 78464 Konstanz,

Email: thomas.huhn@uni-konstanz.de

<sup>2</sup> Current address: Institute of Organic Chemistry and Biochemistry, Czech Academy of Sciences  
Flemingovo nam. 2, 16610 Prague (Czech Republic)

## Supporting Information

### Content

|                                                                |    |
|----------------------------------------------------------------|----|
| <b>List of Figures</b> .....                                   | 2  |
| <b>List of Tables</b> .....                                    | 4  |
| <b>(A) General methods</b> .....                               | 5  |
| <b>(B) Synthesis and Characterization</b> .....                | 6  |
| <b>(C) Crystallographic data</b> .....                         | 16 |
| <b>(D) Plots of one- and two dimensional NMR spectra</b> ..... | 48 |
| <b>(E) References</b> .....                                    | 82 |

## List of Figures

|                                                                                                                                    |    |
|------------------------------------------------------------------------------------------------------------------------------------|----|
| <b>Figure S1.</b> ORTEP of <b>C5F-Et-NPA</b> .....                                                                                 | 16 |
| <b>Figure S2.</b> ORTEP of <b>C5F-T-Et-NPA</b> .....                                                                               | 22 |
| <b>Figure S3.</b> ORTEP of 7-T-Et-MN-pyrr ( <b>8f</b> ) .....                                                                      | 27 |
| <b>Figure S4.</b> ORTEP of C5F-MN ( <b>7</b> ) .....                                                                               | 34 |
| <b>Figure S5.</b> ORTEP of C5H-MN ( <b>14</b> ) .....                                                                              | 38 |
| <b>Figure S6.</b> ORTEP of C5F-yne ( <b>18</b> ).....                                                                              | 43 |
| <b>Figure S7.</b> <sup>1</sup> H NMR spectrum of 2-(4-bromo-5-ethylfuran-2-yl)-5,5-dimethyl-1,3-dioxane in CDCl <sub>3</sub> . ... | 48 |
| <b>Figure S8.</b> <sup>13</sup> C NMR spectrum of 2-(4-bromo-5-ethylfuran-2-yl)-5,5-dimethyl-1,3-dioxane in CDCl <sub>3</sub> . .. | 48 |
| <b>Figure S9.</b> <sup>1</sup> H NMR spectrum of <b>C5F-Et-NPA</b> in CDCl <sub>3</sub> . .....                                    | 49 |
| <b>Figure S10.</b> <sup>13</sup> C NMR spectrum of <b>C5F-Et-NPA</b> in CDCl <sub>3</sub> . .....                                  | 49 |
| <b>Figure S11.</b> <sup>19</sup> F NMR spectrum of <b>C5F-Et-NPA</b> in CDCl <sub>3</sub> . .....                                  | 50 |
| <b>Figure S12.</b> <sup>1</sup> H NMR spectrum of C5F-Et-CHO ( <b>11</b> ) in CDCl <sub>3</sub> . .....                            | 50 |
| <b>Figure S13.</b> <sup>13</sup> C NMR spectrum of C5F-Et-CHO ( <b>11</b> ) in CDCl <sub>3</sub> . .....                           | 51 |
| <b>Figure S14.</b> <sup>19</sup> F NMR spectrum of C5F-Et-CHO ( <b>11</b> ) in CDCl <sub>3</sub> . .....                           | 51 |
| <b>Figure S15.</b> <sup>1</sup> H NMR spectrum of <b>C5F-Et-NPA-CHO</b> in CDCl <sub>3</sub> . .....                               | 52 |
| <b>Figure S16.</b> <sup>13</sup> C NMR spectrum of <b>C5F-Et-NPA-CHO</b> in CDCl <sub>3</sub> . .....                              | 52 |
| <b>Figure S17.</b> <sup>19</sup> F NMR spectrum of <b>C5F-Et-NPA-CHO</b> in CDCl <sub>3</sub> . .....                              | 53 |
| <b>Figure S18.</b> <sup>1</sup> H NMR spectrum of C5F-Et-MN ( <b>12</b> ) in CDCl <sub>3</sub> . .....                             | 53 |
| <b>Figure S19.</b> <sup>13</sup> C NMR spectrum of C5F-Et-MN ( <b>12</b> ) in CDCl <sub>3</sub> . .....                            | 54 |
| <b>Figure S20.</b> <sup>19</sup> F NMR spectrum of C5F-Et-MN ( <b>12</b> ) in CDCl <sub>3</sub> . .....                            | 54 |
| <b>Figure S21.</b> <sup>1</sup> H NMR spectrum of C5F-MN ( <b>7</b> ) in CDCl <sub>3</sub> . .....                                 | 55 |
| <b>Figure S22.</b> <sup>13</sup> C NMR spectrum of C5F-MN ( <b>7</b> ) in CDCl <sub>3</sub> . .....                                | 55 |
| <b>Figure S23.</b> <sup>1</sup> H NMR spectrum of C5H-MN ( <b>14</b> ) in CDCl <sub>3</sub> . .....                                | 56 |
| <b>Figure S24.</b> <sup>13</sup> C NMR spectrum of C5H-MN ( <b>14</b> ) in CDCl <sub>3</sub> . .....                               | 56 |
| <b>Figure S25.</b> <sup>1</sup> H NMR spectrum of 7-MN-pip ( <b>8a</b> ) in CDCl <sub>3</sub> . .....                              | 57 |
| <b>Figure S26.</b> <sup>1</sup> H NMR spectrum of C5F-MN ( <b>7</b> ) in CDCl <sub>3</sub> .....                                   | 57 |
| <b>Figure S27.</b> <sup>13</sup> C NMR spectrum of 7-MN-pip ( <b>8a</b> ) in CDCl <sub>3</sub> . .....                             | 58 |
| <b>Figure S28.</b> <sup>19</sup> F NMR spectrum of 7-MN-pip ( <b>8a</b> ) in CDCl <sub>3</sub> . .....                             | 58 |
| <b>Figure S29.</b> <sup>1</sup> H NMR spectrum of 7-MN-pyrr ( <b>8b</b> ) in CDCl <sub>3</sub> . .....                             | 59 |
| <b>Figure S30.</b> <sup>19</sup> F NMR spectrum of 7-MN-pyrr ( <b>8b</b> ) in CDCl <sub>3</sub> . .....                            | 59 |
| <b>Figure S31.</b> <sup>13</sup> C NMR spectrum of 7-MN-pyrr ( <b>8b</b> ) in CDCl <sub>3</sub> . .....                            | 60 |
| <b>Figure S32.</b> { <sup>1</sup> H, <sup>19</sup> F}-HOESY spectrum of 7-MN-pyrr ( <b>8b</b> ) in CDCl <sub>3</sub> . .....       | 60 |
| <b>Figure S33.</b> <sup>1</sup> H NMR spectrum of 7-MN-mebu ( <b>8c</b> ) in CDCl <sub>3</sub> . .....                             | 61 |
| <b>Figure S34.</b> <sup>13</sup> C NMR spectrum of 7-MN-mebu ( <b>8c</b> ) in CDCl <sub>3</sub> . .....                            | 61 |
| <b>Figure S35.</b> <sup>19</sup> F NMR spectrum of 7-MN-mebu ( <b>8c</b> ) in CDCl <sub>3</sub> . .....                            | 62 |
| <b>Figure S36.</b> { <sup>1</sup> H, <sup>19</sup> F}-HOESY spectrum of 7-MN-mebu ( <b>8c</b> ) in CDCl <sub>3</sub> . .....       | 62 |
| <b>Figure S37.</b> HMBC spectrum of 7-MN-mebu ( <b>8c</b> ) in CDCl <sub>3</sub> . .....                                           | 63 |
| <b>Figure S38.</b> NOESY spectrum of 7-MN-mebu ( <b>8c</b> ) in CDCl <sub>3</sub> . .....                                          | 63 |
| <b>Figure S39.</b> <sup>1</sup> H NMR spectrum of 7-MN-meall ( <b>8d</b> ) in CDCl <sub>3</sub> . .....                            | 64 |
| <b>Figure S40.</b> <sup>13</sup> C NMR spectrum of 7-MN-meall ( <b>8d</b> ) in CDCl <sub>3</sub> . .....                           | 64 |
| <b>Figure S41.</b> <sup>1</sup> H NMR spectrum of 7-MN-cy ( <b>8e</b> ) in CD <sub>3</sub> CN.....                                 | 65 |
| <b>Figure S42.</b> <sup>19</sup> F NMR spectrum of 7-MN-cy ( <b>8e</b> ) in CD <sub>3</sub> CN. ....                               | 65 |
| <b>Figure S43.</b> <sup>13</sup> C NMR spectrum of 7-MN-cy ( <b>8e</b> ) in CD <sub>3</sub> CN. ....                               | 66 |
| <b>Figure S44.</b> <sup>1</sup> H NMR spectrum of 7-T-Et-MN-pyrr ( <b>8f</b> ) in CD <sub>2</sub> Cl <sub>2</sub> . .....          | 66 |
| <b>Figure S45.</b> <sup>19</sup> F NMR spectrum of 7-T-Et-MN-pyrr ( <b>8f</b> ) in CD <sub>2</sub> Cl <sub>2</sub> . .....         | 67 |
| <b>Figure S46.</b> <sup>13</sup> C NMR spectrum of 7-T-Et-MN-pyrr ( <b>8f</b> ) in CD <sub>2</sub> Cl <sub>2</sub> . .....         | 67 |
| <b>Figure S47.</b> NOESY spectrum of 7-T-Et-MN-pyrr ( <b>8f</b> ) in CD <sub>2</sub> Cl <sub>2</sub> . .....                       | 68 |
| <b>Figure S48.</b> <sup>1</sup> H NMR spectrum of 7-MN-MN ( <b>8g</b> ) in CD <sub>3</sub> CN.....                                 | 68 |

|                                                                                                                      |    |
|----------------------------------------------------------------------------------------------------------------------|----|
| <b>Figure S49.</b> $^{19}\text{F}$ NMR spectrum of 7-MN-MN ( <b>8g</b> ) in $\text{CD}_3\text{CN}$ .                 | 69 |
| <b>Figure S50.</b> $^{13}\text{C}$ NMR spectrum of 7-MN-MN ( <b>8g</b> ) in $\text{CD}_3\text{CN}$ .                 | 69 |
| <b>Figure S51.</b> $^1\text{H}$ NMR spectrum of 7-Et-MN-MN ( <b>8h</b> ) in $\text{CD}_3\text{OD}$ .                 | 70 |
| <b>Figure S52.</b> $^{19}\text{F}$ NMR spectrum of 7-Et-MN-MN ( <b>8h</b> ) in $\text{CD}_3\text{OD}$ .              | 70 |
| <b>Figure S53.</b> $^{13}\text{C}$ NMR spectrum of 7-Et-MN-MN ( <b>8h</b> ) in $\text{CD}_3\text{OD}$ .              | 71 |
| <b>Figure S54.</b> $^1\text{H}$ NMR spectrum of C5H-yne ( <b>19</b> ) in $\text{CDCl}_3$ .                           | 71 |
| <b>Figure S55.</b> $^{13}\text{C}$ NMR spectrum of C5H-yne ( <b>19</b> ) in $\text{CDCl}_3$ .                        | 72 |
| <b>Figure S56.</b> $^1\text{H}$ NMR spectrum of 7-yne-OMe ( <b>20</b> ) in $\text{CDCl}_3$ .                         | 72 |
| <b>Figure S57.</b> $^{19}\text{F}$ NMR spectrum of 7-yne-OMe ( <b>20</b> ) in $\text{CDCl}_3$ .                      | 73 |
| <b>Figure S58.</b> $^{13}\text{C}$ NMR spectrum of 7-yne-OMe ( <b>20</b> ) in $\text{CDCl}_3$ .                      | 73 |
| <b>Figure S59.</b> $^1\text{H}$ NMR spectrum of 7-MN-4PyOMe ( <b>17</b> ) in $\text{CDCl}_3$ .                       | 74 |
| <b>Figure S60.</b> $^{19}\text{F}$ NMR spectrum of 7-MN-4PyOMe ( <b>17</b> ) in $\text{CDCl}_3$ .                    | 74 |
| <b>Figure S61.</b> $^{13}\text{C}$ NMR spectrum of 7-MN-4PyOMe ( <b>17</b> ) in $\text{CDCl}_3$ .                    | 75 |
| <b>Figure S62.</b> $\{^1\text{H}, ^{19}\text{F}\}$ -HOESY spectrum of 7-MN-4PyOMe ( <b>17</b> ) in $\text{CDCl}_3$ . | 75 |
| <b>Figure S63.</b> $^1\text{H}$ NMR spectrum of 7-BTSO <sub>2</sub> Et-PhCC-OH ( <b>22</b> ) in acetone- $d_6$ .     | 76 |
| <b>Figure S64.</b> $^{13}\text{C}$ NMR spectrum of 7-BTSO <sub>2</sub> Et-PhCC-OH ( <b>22</b> ) in acetone- $d_6$ .  | 76 |
| <b>Figure S65.</b> $^{19}\text{F}$ NMR spectrum of 7-BTSO <sub>2</sub> Et-PhCC-OH ( <b>22</b> ) in acetone- $d_6$ .  | 77 |
| <b>Figure S66.</b> $^1\text{H}$ NMR spectrum of 7-4SMe ( <b>23</b> ) in $\text{CDCl}_3$ .                            | 77 |
| <b>Figure S67.</b> $^{13}\text{C}$ NMR spectrum of 7-4SMe ( <b>23</b> ) in $\text{CDCl}_3$ .                         | 78 |
| <b>Figure S68.</b> $^{19}\text{F}$ NMR spectrum of 7-4SMe ( <b>23</b> ) in $\text{CDCl}_3$ .                         | 78 |
| <b>Figure S69.</b> $\{^1\text{H}, ^{19}\text{F}\}$ -HOESY spectrum of 7-4SMe ( <b>23</b> ) in $\text{CDCl}_3$ .      | 79 |
| <b>Figure S70.</b> HSQC spectrum of 7-4SMe ( <b>23</b> ) in $\text{CDCl}_3$ .                                        | 79 |
| <b>Figure S71.</b> HMBC spectrum of 7-4SMe ( <b>23</b> ) in $\text{CDCl}_3$ .                                        | 80 |
| <b>Figure S72.</b> NOESY spectrum of 7-4SMe ( <b>23</b> ) in $\text{CDCl}_3$ .                                       | 80 |
| <b>Figure S73.</b> COSY spectrum of 7-4SMe ( <b>23</b> ) in $\text{CDCl}_3$ .                                        | 81 |

## List of Tables

|                                                                                                                                                                                       |    |
|---------------------------------------------------------------------------------------------------------------------------------------------------------------------------------------|----|
| <b>Table S1.</b> Crystal data and structure refinement parameters for <b>C5F-Et-NPA</b> .....                                                                                         | 16 |
| <b>Table S2.</b> Atomic coordinates ( x 10 <sup>4</sup> ) and equivalent isotropic displacement parameters (Å <sup>2</sup> x 10 <sup>3</sup> ) for <b>C5F-Et-NPA</b> .....            | 17 |
| <b>Table S3.</b> Bond lengths [Å] and angles [°] for <b>C5F-Et-NPA</b> .....                                                                                                          | 18 |
| <b>Table S4.</b> Anisotropic displacement parameters (Å <sup>2</sup> x 10 <sup>3</sup> ) for <b>C5F-Et-NPA</b> .....                                                                  | 19 |
| <b>Table S5.</b> Hydrogen coordinates ( x 10 <sup>4</sup> ) and isotropic displacement parameters (Å <sup>2</sup> x 10 <sup>3</sup> ) for <b>C5F-Et-NPA</b> .....                     | 20 |
| <b>Table S6.</b> Torsion angles [°] for <b>C5F-Et-NPA</b> . .....                                                                                                                     | 21 |
| <b>Table S7.</b> Crystal data and structure refinement parameters for <b>C5F-T-Et-NPA</b> .....                                                                                       | 22 |
| <b>Table S8.</b> Atomic coordinates ( x 10 <sup>4</sup> ) and equivalent isotropic displacement parameters (Å <sup>2</sup> x 10 <sup>3</sup> ) for <b>C5F-T-Et-NPA</b> .....          | 23 |
| <b>Table S9.</b> Bond lengths [Å] and angles [°] for <b>C5F-T-Et-NPA</b> . .....                                                                                                      | 24 |
| <b>Table S10.</b> Anisotropic displacement parameters (Å <sup>2</sup> x 10 <sup>3</sup> ) for <b>C5F-T-Et-NPA</b> . .....                                                             | 25 |
| <b>Table S11.</b> Torsion angles [°] for <b>C5F-T-Et-NPA</b> . .....                                                                                                                  | 26 |
| <b>Table S12.</b> Crystal data and structure refinement parameters for 7-T-Et-MN-pyrr ( <b>8f</b> ) .....                                                                             | 27 |
| <b>Table S13.</b> Atomic coordinates ( x 10 <sup>4</sup> ) and equivalent isotropic displacement parameters (Å <sup>2</sup> x 10 <sup>3</sup> ) for 7-T-Et-MN-pyrr ( <b>8f</b> )..... | 28 |
| <b>Table S14.</b> Bond lengths [Å] and angles [°] for 7-T-Et-MN-pyrr ( <b>8f</b> ) .....                                                                                              | 29 |
| <b>Table S15.</b> Anisotropic displacement parameters (Å <sup>2</sup> x 10 <sup>3</sup> ) for 7-T-Et-MN-pyrr ( <b>8f</b> ). .....                                                     | 31 |
| <b>Table S16.</b> Torsion angles [°] for 7-T-Et-MN-pyrr ( <b>8f</b> ). .....                                                                                                          | 32 |
| <b>Table S17.</b> Crystal data and structure refinement parameters for C5F-MN ( <b>7</b> ) .....                                                                                      | 34 |
| <b>Table S18.</b> Atomic coordinates ( x 10 <sup>4</sup> ) and equivalent isotropic displacement parameters (Å <sup>2</sup> x 10 <sup>3</sup> ) for C5F-MN ( <b>7</b> ).....          | 35 |
| <b>Table S19.</b> Bond lengths [Å] and angles [°] for C5F-MN ( <b>7</b> ). .....                                                                                                      | 36 |
| <b>Table S20.</b> Anisotropic displacement parameters (Å <sup>2</sup> x 10 <sup>3</sup> )for C5F-MN ( <b>7</b> ). .....                                                               | 37 |
| <b>Table S21.</b> Crystal data and structure refinement parameters for C5H-MN ( <b>14</b> ).....                                                                                      | 38 |
| <b>Table S22.</b> Atomic coordinates ( x 10 <sup>4</sup> ) and equivalent isotropic displacement parameters (Å <sup>2</sup> x 10 <sup>3</sup> ) for C5H-MN ( <b>14</b> ). .....       | 39 |
| <b>Table S23.</b> Bond lengths [Å] and angles [°] for C5H-MN ( <b>14</b> ).....                                                                                                       | 40 |
| <b>Table S24.</b> Anisotropic displacement parameters (Å <sup>2</sup> x 10 <sup>3</sup> ) for C5H-MN ( <b>14</b> ).....                                                               | 41 |
| <b>Table S25.</b> Torsion angles [°] for C5H-MN ( <b>14</b> ).....                                                                                                                    | 42 |
| <b>Table S26.</b> Crystal data and structure refinement parameters for C5F-yne ( <b>18</b> ) .....                                                                                    | 43 |
| <b>Table S27.</b> Atomic coordinates ( x 10 <sup>4</sup> ) and equivalent isotropic displacement parameters (Å <sup>2</sup> x 10 <sup>3</sup> ) for C5F-yne ( <b>18</b> ). .....      | 44 |
| <b>Table S28.</b> Bond lengths [Å] and angles [°] for C5F-yne ( <b>18</b> ).....                                                                                                      | 45 |
| <b>Table S29.</b> Anisotropic displacement parameters (Å <sup>2</sup> x 10 <sup>3</sup> ) for C5F-yne ( <b>18</b> ). .....                                                            | 46 |
| <b>Table S30.</b> Torsion angles [°] for C5F-yne ( <b>18</b> ). .....                                                                                                                 | 47 |

## (A) General Methods

All operations with air- and moisture-sensitive compounds were performed under nitrogen atmosphere using standard Schlenk techniques. The solvents for column chromatography were purified according to standard procedures. Malodinitrile was purchased from Merck. Amines and *n*-BuLi were purchased from Sigma-Aldrich. 5-Ethyl-2-thiophenecarboxaldehyde and 5-ethyl-2-furaldehyde were purchased from ABCR. Octafluorocyclopentene was purchased from TCI. Chemicals were used without further purification. Compounds C5F-T-Et-MN (**15**),<sup>[1]</sup> C5F-CHO (**6**),<sup>[2]</sup> C5H-CHO (**13**)<sup>[3]</sup> and C5F-yne (**18**)<sup>[4]</sup> were prepared according to known literature procedures.

Chromatography was performed on MN Kieselgel 60 M (silica gel, Macherey-Nagel, Germany). Elemental analyses were performed on a CHN-analyzer Heraeus (CHN-O-RAPID) by the Microanalysis laboratory of Konstanz University.

GC/MS was performed on an Agilent GC/MS 7890A/5975C instrument (EI, 70 eV). HRMS ESI/FT-ICR spectra were recorded on a Bruker APEX II FT/ICR instrument. FAB MS was performed on a Finnigan MAT 8200 instrument.

IR spectra were measured on a Perkin Elmer Spectrum 100 ATR spectrometer.

NMR spectra were recorded on a Bruker Avance DRX600 or a Bruker Avance 400. Trace impurities of protonated deuterated solvent were used as reference. <sup>1</sup>H NMR chemical shifts were referenced to residual protons in the NMR solvent (CDCl<sub>3</sub>: δ = 7.26; CD<sub>2</sub>Cl<sub>2</sub>: δ = 5.32; CD<sub>3</sub>CN: δ = 1.94; CD<sub>3</sub>OD: δ = 3.31 ppm, acetone-d<sub>6</sub>: δ = 2.05 ppm). For <sup>13</sup>C NMR following values were used: CDCl<sub>3</sub>: δ = 77.16; CD<sub>2</sub>Cl<sub>2</sub>: δ = 54.00; CD<sub>3</sub>CN: δ = 1.32; CD<sub>3</sub>OD: δ = 49.00 ppm; acetone-d<sub>6</sub>: δ = 206.68 ppm. Following abbreviations were used for NMR data: s (singlet), d (doublet), t (triplet), q (quartet), p (pentet), m (multiplet), br (broad), dd (doublet of doublets), dt (doublet of triplets), and tt (triplet of triplets). Structure assignments were done based on 2D-NMR (COSY, HSQC, HMBC, NOESY and HOESY) experiments.

Data collection for X-ray structure determination was performed at a STOE IPDS-II diffractometer equipped with a graphite monochromated radiation source (λ = 0.71073 Å), an image plate detection system and an Oxford Cryostream 700 with nitrogen as coolant gas. The selection, integration, and averaging procedure of the measured reflex intensities, the determination of the unit cell by a least-squares fit of the 2θ values, data reduction, LP correction, and the space group determination were performed using the X-Area software package delivered with the diffractometer.<sup>[5]</sup> A semiempirical absorption correction method was performed after indexing of the crystal faces. The structures were solved by direct methods (SHELXS-97)<sup>[6]</sup> and refined by standard Fourier techniques against F square with a full-matrix least squares algorithm using SHELXL-2013 and the WinGX (2018.3)<sup>[7]</sup> software package. All non-hydrogen atoms were refined anisotropically. Hydrogen atoms were placed in calculated positions and refined with a riding model. Graphical representations were prepared with ORTEP-III.<sup>[7]</sup> Crystallographic data have been deposited with the Cambridge Crystallographic Data Centre as supplementary publication nos. CCDC 1037923 (C5F-Et-NPA), CCDC 1037924 (7-T-Et-MN-pyrr (**8f**)), CCDC 894167 (C5F-MN (**7**)), CCDC 1946677 (C5F-T-Et-NPA), CCDC 1946676 (C5H-MN (**14**)) and CCDC 2016261 (C5F-yne (**18**)).

## (B) Synthesis and Characterization

### 1) Synthesis of C5F-Et-MN (12)

**a) 4-Bromo-5-ethyl-2-furaldehyde:** 5-Ethyl-2-furaldehyde (6.2 g, 50 mmol, 1.1 equiv.) was placed in a 250 mL two-necked flask equipped with a reflux condenser, magnetic stirring bar and a powder funnel and was cooled down to 0° C in an ice bath. AlCl<sub>3</sub> (14.7 g, 110 mmol, 2.4 equiv.) was added in three portions while stirring at low rpm values (alternatively a thick glass rod may be used for stirring). Then the powder funnel was replaced by a dropping funnel, and bromine (2.3 mL, 45 mmol, 1 equiv.) was added dropwise over 3 minutes. The resulting dark viscous mixture was left overnight in the ice bath, allowing it to warm up to rt. The flask was then cooled down in an ice bath, and crushed ice (100 g) was added in small portions to the reaction mixture avoiding overheating. The resulting heterogeneous mixture was extracted with Et<sub>2</sub>O (3x100 mL), the combined organic phase were dried over MgSO<sub>4</sub>, and the volatiles were removed *in vacuo*. The dark oily residue was dissolved in *n*-hexane (300 mL) at 50° C, and the orange solution containing black suspended particles was filtered hot through a paper filter. After removing the hexane 5.3 g of brown oil remained, which solidified upon standing. The desired 4-bromo-5-ethyl-2-furaldehyde was obtained in 52% yield as brown solid and was used for the next step without further purification. MS (EI, 70 eV) for C<sub>7</sub>H<sub>7</sub>BrO<sub>2</sub>: 202 [M (<sup>79</sup>Br)], 204 [M (<sup>81</sup>Br)].

**b) 2-(4-Bromo-5-ethylfuran-2-yl)-5,5-dimethyl-1,3-dioxane:** Acetal protection of 4-bromo-5-ethylfuran-2-carbaldehyde was done as described in ref [8] for its methyl analogue. Isolated as yellow oil. <sup>1</sup>H NMR (400 MHz, CDCl<sub>3</sub>): δ = 0.77 (s, 3H; CH<sub>3</sub> (C10)), 1.19 (t, <sup>3</sup>J<sub>HH</sub> = 7.6 Hz, 3H; CH<sub>3</sub> (C1)), 1.23 (s, 3H; CH<sub>3</sub> (C11)), 2.64 (q, <sup>3</sup>J<sub>HH</sub> = 7.6 Hz, 2H; CH<sub>2</sub> (C2)), 3.57 (d, <sup>2</sup>J<sub>HH</sub> = 11.2 Hz, 2H; CH<sub>2</sub> (C8)), 3.72 (d, <sup>2</sup>J<sub>HH</sub> = 11.2 Hz, 2H; CH<sub>2</sub> (C8)), 5.37 (s, 1H; CH (C7)), 6.40 ppm (s, 1H; CH (C5)); <sup>13</sup>C NMR (100 MHz, CDCl<sub>3</sub>): δ = 12.35 (C1), 19.95 (C2), 22.06 (C10), 23.14 (C11), 30.61 (C9), 77.64 (C8), 95.95 (C4), 96.04 (C7), 111.48 (C5), 149.54 (C6), 154.30 ppm (C3); MS (EI, 70 eV) for C<sub>12</sub>H<sub>17</sub>BrO<sub>3</sub>: 288 [M (<sup>79</sup>Br)], 290 [M (<sup>81</sup>Br)].

**c) 2,2'-((Hexafluorocyclopent-1-ene-1,2-diyl)bis(5-ethylfuran-4,2-diyl))bis(5,5-dimethyl-1,3-dioxane) C5F-Et-NPA:** 2-(4-Bromo-5-ethylfuran-2-yl)-5,5-dimethyl-1,3-dioxane (1.46 g, 5.05 mmol, 1 equiv.) was dissolved in dry THF (50 mL) at -78° C. *n*BuLi (1.6 M, 3.47 mL, 5.56 mmol, 1.1 equiv.) was added dropwise at -78° C and the mixture was kept at that temperature for another 30 min. Octafluorocyclopentene (0.33 mL, 2.52 mmol, 0.5 equiv.) was added dropwise, and the reaction mixture was left to warm up to rt overnight. After quenching with brine (10 mL), THF was removed *in vacuo*, water (50 mL) was added and the mixture was extracted with diethyl ether (5x50 mL). Combined organic phases were dried over MgSO<sub>4</sub> and the volatiles were evaporated. The resulting brown oil was purified by column chromatography on silica gel using *n*-hexane/EtOAc 4/1 mixture as eluent. The title compound was isolated in 54% yield as yellow oil (0.81 g, 1.36 mmol). <sup>1</sup>H NMR (400 MHz, CDCl<sub>3</sub>): δ = 0.76 (s, 6H; CH<sub>3</sub> (C10)), 0.94 (t, <sup>3</sup>J<sub>HH</sub> = 7.5 Hz, 6H; CH<sub>3</sub> (C1)), 1.24 (s, 6H; CH<sub>3</sub> (C11)), 2.26 (q, <sup>3</sup>J<sub>HH</sub> = 7.5 Hz, 4H; CH<sub>2</sub> (C2)), 3.56 (d, <sup>2</sup>J<sub>HH</sub> = 11.0 Hz, 4H; CH<sub>2</sub> (C8)), 3.72 (d, <sup>2</sup>J<sub>HH</sub> = 11.0 Hz, 4H; CH<sub>2</sub> (C8)), 5.38 (s, 2H; CH (C7)), 6.44 ppm (s, 2H; CH (C5)); <sup>13</sup>C NMR (100 MHz, CDCl<sub>3</sub>): δ = 11.58 (C1), 21.08 (C2), 22.02 (C10), 23.13 (C11), 30.60 (C9), 77.63 (C8), 95.90 (C7), 108.17 (C5),

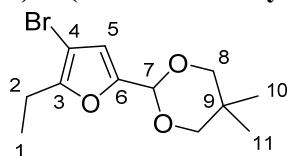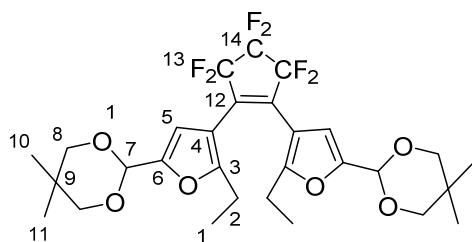

108.51 (C4), 111.07 (m, C14), 116.01 (m, C13), 133.30 (m, C12), 150.81 (C6), 157.59 ppm (C3);  $^{19}\text{F}$  NMR (376 MHz,  $\text{CDCl}_3$ ):  $\delta = -110.63$  (t,  $J = 5.2$  Hz, 4F),  $-131.82$  ppm (p,  $J = 5.2$  Hz; 2F); IR:  $\nu = 2951, 2850, 1263, 1101$   $\text{cm}^{-1}$ ; MS (EI, 70 eV): 592 [M]; HRMS (ESI) calcd for  $\text{C}_{29}\text{H}_{34}\text{F}_6\text{O}_6$ : 593.2332 [M+H], found: 593.2323; elemental analysis calcd (%) for  $\text{C}_{29}\text{H}_{34}\text{F}_6\text{O}_6$ : C 58.78, H 5.78; found: C 58.77, H 6.09.

**d) 4,4'-(Hexafluorocyclopent-1-ene-1,2-diyl)bis(5-ethylfuran-2-carbaldehyde) (C5F-Et-CHO**

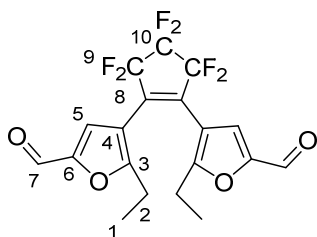

**(11)**): **C5F-Et-NPA** (1 g, 1.69 mmol) was dissolved in a THF/acetone mixture (30 mL each) and cooled to  $10^\circ\text{C}$ . Conc. HCl (15 ml) was slowly added while maintaining the temperature between  $10 - 15^\circ\text{C}$ . After complete addition, the solution was stirred at rt and monitored by TLC. After complete deprotection the organic solvents were removed *in vacuo* and the residue was brought to pH = 9 by adding aqueous  $\text{NaHCO}_3$ . After extraction

with diethyl ether (3 x 50 mL) the combined organic fractions were dried over  $\text{MgSO}_4$  and the solvent was removed *in vacuo*. The oily residue was purified by column chromatography on silica gel using n-hexane/EtOAc 2/1 mixture as eluent, thus giving 87% (0.62 g, 1.47 mmol) of C5F-Et-CHO (**11**) as yellow oil.  $^1\text{H}$  NMR (400 MHz,  $\text{CDCl}_3$ ):  $\delta = 1.04$  (t,  $^3J_{\text{HH}} = 7.5$  Hz, 6H;  $\text{CH}_3$  (C1)), 2.34 (q,  $^3J_{\text{HH}} = 7.5$  Hz, 4H;  $\text{CH}_2$  (C2)), 7.21 (s, 2H; CH (C5)), 9.58 ppm (s, 2H; CHO);  $^{13}\text{C}$  NMR (100 MHz,  $\text{CDCl}_3$ ):  $\delta = 11.24$  (C1), 21.54 (C2), 110.52 (C4), 110.74 (m, C10), 115.81 (m, C9), 120.83 (C5), 133.57 (m, C8), 152.42 (C6), 163.34 (C3) 177.15 ppm (CHO);  $^{19}\text{F}$  NMR (376 MHz,  $\text{CDCl}_3$ ):  $\delta = -110.74$  (t,  $J = 5.0$  Hz, 4F),  $-131.64$  ppm (p,  $J = 4.8$  Hz; 2F); IR:  $\nu = 2984, 2848, 1682$  (C=O),  $1110$   $\text{cm}^{-1}$ ; MS (EI, 70 eV): 420 [M]; HRMS (ESI) calcd for  $\text{C}_{19}\text{H}_{14}\text{F}_6\text{O}_4$ : 421.0869 [M+H], found: 421.0933; elemental analysis calcd (%) for  $\text{C}_{19}\text{H}_{14}\text{F}_6\text{O}_4$ : C 54.30, H 3.36; found: C 54.26, H 3.94.

**e) 4-(2-(5-(5,5-Dimethyl-1,3-dioxan-2-yl)-2-ethylfuran-3-yl)-3,3,4,4,5,5-hexafluorocyclopent-1-en-1-yl)-5-ethylfuran-2-carbaldehyde** was isolated as byproduct from several batches

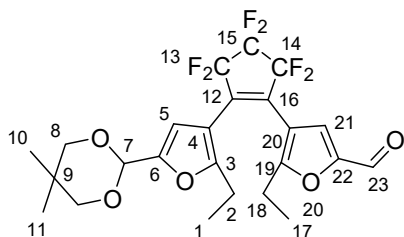

of deprotection of **C5F-Et-NPA**. Yellow oil.  $^1\text{H}$  NMR (400 MHz,  $\text{CDCl}_3$ ):  $\delta = 0.78$  (s, 3H;  $\text{CH}_3$  (C10)), 0.97 (t,  $^3J_{\text{HH}} = 7.5$  Hz, 3H;  $\text{CH}_3$  (C1)), 1.05 (t,  $^3J_{\text{HH}} = 7.5$  Hz, 3H;  $\text{CH}_3$  (C17)), 1.24 (s, 3H;  $\text{CH}_3$  (C11)), 2.27 (q,  $^3J_{\text{HH}} = 7.5$  Hz, 2H;  $\text{CH}_2$  (C2)), 2.38 (q,  $^3J_{\text{HH}} = 7.5$  Hz, 2H;  $\text{CH}_2$  (C18)), 3.58 (d,  $^2J_{\text{HH}} = 10.2$  Hz, 2H;  $\text{CH}_2$  (C8)), 3.73 (d,  $^2J_{\text{HH}} = 11.3$  Hz, 2H;  $\text{CH}_2$  (C8)), 5.39 (s, 1H; CH (C7)), 6.43 (s, 1H; CH (C5)),

7.24 (s, 1H; CH (C21)), 9.57 ppm (s, 1H; CHO);  $^{13}\text{C}$  NMR (100 MHz,  $\text{CDCl}_3$ ):  $\delta = 11.11$  (C17), 11.56 (C1), 21.07 (C2), 21.41 (C18), 21.91 (C10), 23.03 (C11), 30.52 (C9), 77.57 (C8), 95.67 (C7), 107.72 (C5), 108.08 (C4), 110.83 (m, C15), 110.99 (C20), 114.51 (m, C13, C14), 121.74 (C21), 131.17 (m, C16), 135.47 (m, C12), 151.36 (C6), 152.07 (C22), 157.59 (C3), 163.55 (C19), 177.04 ppm (CHO);  $^{19}\text{F}$  NMR (376 MHz,  $\text{CDCl}_3$ ):  $\delta = -110.51$  (t,  $J = 4.4$  Hz, 2F),  $-110.87$  (t,  $J = 4.3$  Hz, 2F),  $-131.76$  ppm (p,  $J = 5.1$  Hz; 2F); IR:  $\nu = 2960, 2851, 1686$  (C=O), 1276, 1103  $\text{cm}^{-1}$ ; MS (EI, 70 eV): 506 [M]; HRMS (ESI) calcd for  $\text{C}_{24}\text{H}_{24}\text{F}_6\text{O}_5$ : 507.1600 [M+H], found: 507.1523.

f) **2,2'-(((Hexafluorocyclopent-1-ene-1,2-diyl)bis(5-ethylfuran-4,2-diyl))bis(methanylylidene))malodinitrile (C5F-Et-MN (12))**: Dialdehyde **11** (0.46 g, 1.1 mmol) and malodinitrile (0.24 g, 3.6 mmol, 3.3 equiv.) were dissolved in dry benzene (25 mL). Pyridine (0.1 mL) was added and the reaction mixture was stirred overnight at rt. Benzene was removed *in vacuo* and the remaining brownish solid was purified by column chromatography on silica using *n*-hexane/EtOAc 1/4 mixture as eluent. C5F-Et-MN (**12**) was isolated in 91% (0.52 g) as yellow oil which solidified after sonication in CHCl<sub>3</sub>/*n*-hexane 1/5 mixture to a yellowish solid. <sup>1</sup>H NMR (400 MHz, CDCl<sub>3</sub>): δ = 1.16 (t, <sup>3</sup>J<sub>HH</sub> = 7.5 Hz, 6H; CH<sub>3</sub> (C1)), 2.46 (q, <sup>3</sup>J<sub>HH</sub> = 7.5 Hz, 4H; CH<sub>2</sub> (C2)), 7.21 (s, 2H; CH (C5)), 7.41 ppm (s, 2H; CH (C7)); <sup>13</sup>C NMR (100 MHz, CDCl<sub>3</sub>): δ = 11.07 (C1), 21.87 (C2), 79.91 (C8), 112.09 (C4), 112.36 (C10), 113.41 (C9), 115.63 (m, C12), 122.42 (C5), 133.60 (m, C11), 141.76 (C7), 147.70 (C6), 164.84 ppm (C3); <sup>19</sup>F NMR (376 MHz, CDCl<sub>3</sub>): δ = -110.45 (t, *J* = 4.9 Hz, 4F), -131.52 ppm (p, *J* = 4.8 Hz; 2F); IR: ν = 2924, 2231 (CN), 1608, 1109 cm<sup>-1</sup>; HRMS (ESI, pos. mode) calcd for C<sub>25</sub>H<sub>14</sub>F<sub>6</sub>N<sub>4</sub>O<sub>2</sub>: 517.1093 [M+H], found: 517.1056; HRMS (ESI, neg. mode) calcd for C<sub>25</sub>H<sub>14</sub>F<sub>6</sub>N<sub>4</sub>O<sub>2</sub>: 515.0937 [M-H], found: 515.1018.

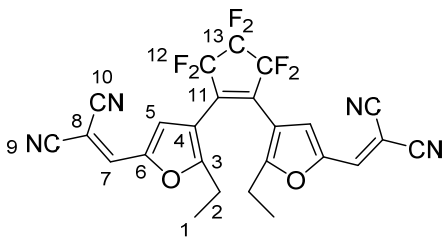

**2,2'-(((Hexafluorocyclopent-1-ene-1,2-diyl)bis(5-methylfuran-4,2-diyl))bis(methanylylidene))malodinitrile (5F-MN (7))**: C5F-CHO (**6**) (50 mg, 0.127 mmol, 1 equiv.) and malodinitrile (18.5 mg, 0.28 mmol, 2.2 equiv.) were dissolved in dry benzene (8 mL). Pyridine (0.05 mL) was added and the reaction mixture was stirred overnight at rt. A white precipitate was filtered off and washed with *n*-hexane. C5F-MN (**7**) was isolated in 92 % (57 mg) yield as white solid. <sup>1</sup>H NMR (600 MHz, CDCl<sub>3</sub>): δ = 2.27 (s, 6H; CH<sub>3</sub> (C1)), 7.27 (s, 2H; CH (C4)), 7.43 ppm (s, 2H; CH (C6)); <sup>13</sup>C NMR (150 MHz, CDCl<sub>3</sub>): δ = 14.34 (C1), 79.87 (C7), 110.61 (m, C12), 112.24 (C9), 113.13 (C3), 113.27 (C8), 115.59 (tt, <sup>1</sup>J<sub>CF</sub> = 258.1, <sup>2</sup>J<sub>CF</sub> = 24.4 Hz; C11), 122.19 (C4), 133.60 (t, <sup>2</sup>J<sub>CF</sub> = 24.9 Hz; C10), 141.81 (C6), 147.62 (C5), 160.35 ppm (C2); <sup>19</sup>F NMR (376 MHz, CDCl<sub>3</sub>): δ = -109.99 (t, *J* = 4.9 Hz, 4F), -131.47 ppm (p, *J* = 5.0 Hz; 2F); IR: ν = 2225 (CN) cm<sup>-1</sup>; MS (FAB, add. NaI): 489 [M+H], 511 [M+Na]; HRMS (ESI) calcd for C<sub>23</sub>H<sub>10</sub>F<sub>6</sub>N<sub>4</sub>O<sub>2</sub>: 489.0781 [M+H], found: 489.0774; elemental analysis calcd (%) for C<sub>23</sub>H<sub>10</sub>F<sub>6</sub>N<sub>4</sub>O<sub>2</sub>: C 56.57, H 2.06, N 11.47; found: C 56.39, H 2.47, N 11.66.

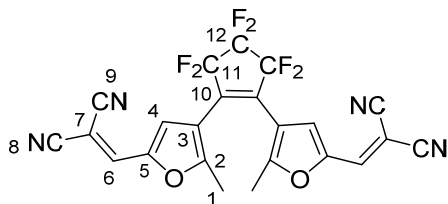

**2,2'-((cyclopent-1-ene-1,2-diylbis(5-methylfuran-4,2-diyl))bis(methanylylidene))dimalononitrile (C5H-MN (14))**: C5H-CHO (**13**) (100 mg, 0.35 mmol) and malononitrile (49 mg, 0.74 mmol) were dissolved in dry benzene (10 mL). Pyridine (0.05 mL) was added and the reaction mixture was stirred overnight at rt. Benzene was removed *in vacuo* and the remaining brownish solid was purified by column chromatography using *n*-hexane/EtOAc 1/3 mixture as eluent to give a oil which solidified after sonication in CHCl<sub>3</sub>/*n*-hexane 1/5 mixture. C5H-MN (**14**) was isolated in 68% (91 mg) yield. <sup>1</sup>H NMR (400 MHz, CDCl<sub>3</sub>): δ = 2.09 (p, <sup>3</sup>J<sub>HH</sub> = 7.6 Hz, 2H; CH<sub>2</sub> (C12)), 2.19 (s, 6H; CH<sub>3</sub> (C1)), 2.77 (t, <sup>3</sup>J<sub>HH</sub> = 7.5 Hz, 4H; CH<sub>2</sub> (C11)), 7.11 (s, 2H; CH (C4)), 7.33 ppm (s, 2H; CH (C6)); <sup>13</sup>C NMR (100 MHz, CDCl<sub>3</sub>): δ = 14.18 (C1), 22.64 (C12), 37.96 (C11), 75.85 (C7), 113.04 (C9), 114.20 (C8), 123.06 (C3), 124.34 (C4), 131.13 (C10), 142.13 (C6), 146.64 (C5), 157.85 ppm (C2); IR: ν =

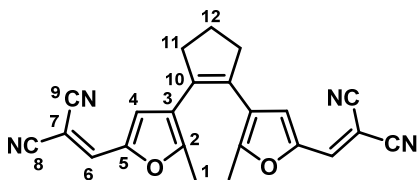



2930, 2847, 2223 (CN), 1607, 1568, 1494, 1118  $\text{cm}^{-1}$ ; HRMS (ESI, neg. mode) calcd for  $\text{C}_{23}\text{H}_{16}\text{N}_4\text{O}_2$ : 379.1190 [M-H], found: 379.1222.

**1,2-Bis(5-ethynyl-2-methylfuran-3-yl)cyclopent-1-ene (C5H-YNE (19)):** C5H-CHO (6) (10 mg, 0.035 mmol) was dissolved in methanol (3 mL) at rt. Dimethyl 1-diazo-2-oxopropylphosphonate (16.2 mg, 0.084 mmol) and potassium carbonate (19 mg, 0.140 mmol) were added and the mixture was stirred overnight. Volatiles were removed *in vacuo*, water (2 mL) was added and the mixture was extracted with dichloromethane (2 x 5 mL). Combined organic phases were dried over  $\text{MgSO}_4$  and the volatiles were evaporated. Resulting orange-colored oil was purified by column chromatography on silica gel using n-hexane/dichloromethane 2/1 mixture as eluent. C5H-YNE (19) was isolated in 71 % yield (7 mg) as colorless solid.  $^1\text{H}$  NMR (400 MHz,  $\text{CDCl}_3$ ):  $\delta$  = 2.00 (s, 6H;  $\text{CH}_3$  (C1)), 2.00 (p,  $^3J_{\text{HH}}$  = 7.5 Hz, 2H;  $\text{CH}_2$  (C10)), 2.68 (t,  $^3J_{\text{HH}}$  = 7.5 Hz, 4H;  $\text{CH}_2$  (C9)), 3.39 (s, 2H; CH (C7)), 6.45 ppm (s, 2H; CH (C4));  $^{13}\text{C}$  NMR (100 MHz,  $\text{CDCl}_3$ ):  $\delta$  = 13.59 (C1), 22.61 (C10), 37.97 (C9), 74.31 (C6), 81.85 (C7), 117.72 (C4), 118.87 (C3), 130.13 (C8), 133.96 (C5), 150.20 ppm (C2); IR:  $\nu$  = 3311, 2954, 2921, 2851, 2097, 1529  $\text{cm}^{-1}$ ; MS (EI): 276 [M]; HRMS (EI) calcd for  $\text{C}_{19}\text{H}_{16}\text{O}_2$ : 276.1150 [M], found: 276.1153.

### General procedure: Reaction of bis(dicyanovinyl) DAEs with secondary amines

C5F-MN (7) (50 mg, 0.1 mmol, 1 equiv.) was dissolved in dry benzene (7 mL), and amine (1.27 mmol, 10 equiv.) was added. The reaction mixture turned magenta (greenish-blue when dicyclohexylamine was used). After stirring overnight at r. t. volatiles were removed *in vacuo* and the oily residue was subjected to column chromatography (n-hexane/EtOAc 3/1, then 1/1 (then methanol for dicyclohexyl derivative)). Corresponding magenta (green for dicyclohexyl derivative) fraction containing tetrafluoro product was separated from the mixture of unidentifiable yellow- to brown-colored degradation products of DAE. Immobile polar dark residue on top of column contained mainly the corresponding amine hydrofluoride.

**2,2'-((1,1,2,2-Tetrafluoro-7a-methyl-3-(piperidin-1-yl)-1,2,7,7a-tetrahydroazuleno[5,4-b:7,8-b']difuran-5,9-diyl)bis(methanylylidene))malodinitrile (7-MN-pip (8a)):** According to general procedure 8a was obtained as dark-magenta solid (19 mg, 35%) besides 11 mg (22%) starting material 7.  $^1\text{H}$  NMR (400 MHz,  $\text{CDCl}_3$ ):  $\delta$  = 1.22 (s, 3H;  $\text{CH}_3$ ), 1.68 (m, 4H;  $\text{CH}_2$  (C25 and C26)), 1.79 (m, 2H;  $\text{CH}_2$  (C25)), 3.23 (m, 2H;  $\text{NCH}_2$ ), 3.33 (d,  $^2J_{\text{HH}}$  = 15.0 Hz, 1H;  $\text{CH}_2$  (C10)), 3.43 (m, 2H;  $\text{NCH}_2$ ), 3.72 (d,  $^2J_{\text{HH}}$  = 14.9 Hz, 1H;  $\text{CH}_2$  (C10)), 6.71 (t,  $J_{\text{HF}}$  = 2.3 Hz, 1H; CH (C4)), 7.07 (s, 1H; CH (C6)), 7.56 (s, 1H; CH (C15)), 7.67 ppm (s, 1H; CH (C13));  $^{13}\text{C}$  NMR (150 MHz,  $\text{CDCl}_3$ ):  $\delta$  = 23.53 (C26), 26.21 (C25), 26.71 (C1), 39.29 (C10), 51.81 (C24), 78.55 (C16), 81.52 (C7), 87.88 (C2), 109.81 (m, C23), 112.52 (C9), 112.93 (C17), 113.40 (C18), 114.35 (C8), 118.33 (C12), 120.34 (C4), 121.74 (C13), 136.80 (C3), 141.10 (C6), 143.11 (C15), 143.97 (m, C22), 146.75 (C14), 153.56 (C5), 155.73 ppm (C11) (signals of C19, C20 and C21 were not identified);  $^{19}\text{F}$  NMR (376 MHz,  $\text{CDCl}_3$ ):  $\delta$  = -105.35 (d,  $J$  = 252.6 Hz, 1F), -106.96 (d,  $J$  = 250.0 Hz, 1F), -118.53 (d,  $J$  = 252.9 Hz, 1F), -119.31 ppm (d,  $J$  = 249.9 Hz, 1F); IR:  $\nu$  = 3107, 2943, 2859, 2225 (CN), 1607, 1506, 1275  $\text{cm}^{-1}$ ; MS (FAB): 534 [M+H]; HRMS (ESI) calcd for  $\text{C}_{28}\text{H}_{19}\text{F}_4\text{N}_5\text{O}_2$ : 533.1475, found: 533.1522 (neg. mode).

**2,2'-((1,1,2,2-Tetrafluoro-7a-methyl-3-(pyrrolidin-1-yl)-1,2,7,7a-tetrahydroazuleno[5,4-b:7,8-b']difuran-5,9-diyl)bis(methanylylidene))malodinitrile (7-MN-pyrr (8b)):**

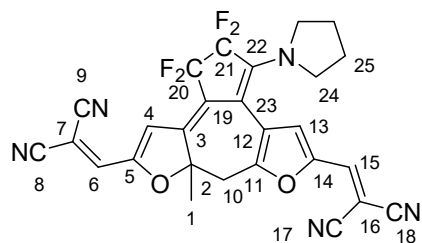

According to general procedure **8b** was obtained as dark-magenta solid (46 mg, 88%) besides trace amounts of starting material **7**.  $^1\text{H}$  NMR (400 MHz,  $\text{CDCl}_3$ ):  $\delta$  = 1.17 (s, 3H;  $\text{CH}_3$ ), 1.91 (m, 2H;  $\text{CH}_2$  (C25)), 2.10 (m, 2H;  $\text{CH}_2$  (C25)), 3.29 (m, 2H;  $\text{NCH}_2$ ), 3.32 (d,  $^2J_{\text{HH}}$  = 14.8 Hz, 1H;  $\text{CH}_2$  (C10)), 3.72 (m, 2H;  $\text{NCH}_2$ ), 3.73 (d,  $^2J_{\text{HH}}$  = 14.7 Hz, 1H;  $\text{CH}_2$  (C10)), 6.72 (t,  $J_{\text{HF}}$  = 2.4 Hz, 1H; CH (C4)), 7.06 (s, 1H; CH (C6)), 7.43 (s, 1H; CH (C13)), 7.57 ppm (s, 1H; CH (C15));  $^{13}\text{C}$  NMR (150 MHz,  $\text{CDCl}_3$ ):  $\delta$  = 25.68 (C25), 26.67 (C1), 39.28 (C10), 51.74 (C24), 78.25 (C16), 80.92 (C7), 87.92 (C2), 107.94 (m, C23), 112.62 (C9), 112.97 (C17), 113.43 (C18), 114.47 (C8), 118.43 (C12), 120.77 (C4), 122.71 (C13), 124.25 (t,  $^2J_{\text{CF}}$  = 21.4 Hz; C19), 135.34 (C3), 141.11 (C6), 142.23 (t,  $^2J_{\text{CF}}$  = 21.3 Hz; C22), 143.16 (C15), 146.43 (C14), 153.11 (C5), 155.94 ppm (C11);  $^{19}\text{F}$  NMR (376 MHz,  $\text{CDCl}_3$ ):  $\delta$  = -107.37 (d,  $J$  = 252.5 Hz, 1F), -108.34 (d,  $J$  = 256.7 Hz, 1F), -115.24 (d,  $J$  = 256.7 Hz, 1F), -115.45 ppm (d,  $J$  = 254.3 Hz, 1F); correlations confirmed by NOESY (C13-H and C24-H) and HOESY (F and C4-H; F and C24-H) data; IR:  $\nu$  = 3120, 2926, 2222 (CN), 1617, 1595  $\text{cm}^{-1}$ ; HRMS (ESI) calcd for  $\text{C}_{27}\text{H}_{17}\text{F}_4\text{N}_5\text{O}_2$ : 520.1391 [M+H], found: 520.1388.

**2,2'-((3-(Butyl(methyl)amino)-1,1,2,2-tetrafluoro-7a-methyl-1,2,7,7a-tetrahydroazuleno[5,4-b:7,8-b']difuran-5,9-diyl)bis(methanylylidene))malodinitrile (7-MN-mebu (8c)):**

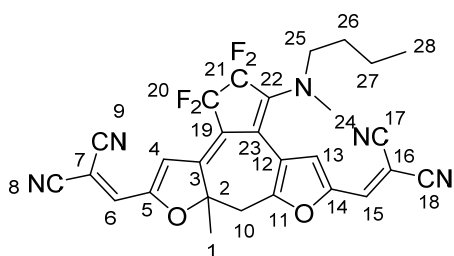

According to general procedure **8c** was obtained as dark-magenta solid (24 mg, 44%) besides 13 mg (27%) starting material **7**.  $^1\text{H}$  NMR (400 MHz,  $\text{CDCl}_3$ ):  $\delta$  = 0.92 (t,  $^3J_{\text{HH}}$  = 7.3 Hz, 3H;  $\text{CH}_3$  (C28)), 1.22 (s, 3H;  $\text{CH}_3$ ), 1.31 (m, 2H;  $\text{CH}_2$  (C27)), 1.65 (m, 2H;  $\text{CH}_2$  (C26)), 3.02 (s, 3H;  $\text{NCH}_3$ ), 3.20 (m, 1H;  $\text{CH}_2$  (C25)), 3.33 (d,  $^2J_{\text{HH}}$  = 14.9 Hz, 1H;  $\text{CH}_2$  (C10)), 3.51 (m, 1H;  $\text{CH}_2$  (C25)), 3.73 (d,  $^2J_{\text{HH}}$  = 14.9 Hz, 1H;  $\text{CH}_2$  (C10)), 6.71 (t,  $J_{\text{HF}}$  = 2.3 Hz, 1H; CH (C4)), 7.07 (s, 1H; CH (C6)), 7.54 (s, 1H; CH (C13)), 7.58 ppm (s, 1H; CH (C15));  $^{13}\text{C}$  NMR (150 MHz,  $\text{CDCl}_3$ ):  $\delta$  = 13.72 (C28), 19.89 (C27), 26.65 (C1), 30.22 (C26), 39.27 (C10), 40.91 (C24), 54.48 (C25), 78.61 (C16), 81.52 (C7), 87.87 (C2), 109.58 (C23), 112.50 (C9), 112.92 (C17), 113.34 (C18), 114.33 (C8), 118.17 (C12), 120.36 (C4), 121.88 (C13), 123.41 (t,  $^2J_{\text{CF}}$  = 20.4 Hz; C19), 136.57 (C3), 141.13 (C6), 143.20 (C15), 144.61 (t,  $^2J_{\text{CF}}$  = 21.3 Hz; C22), 146.74 (C14), 153.54 (C5), 155.74 ppm (C11);  $^{19}\text{F}$  NMR (376 MHz,  $\text{CDCl}_3$ ):  $\delta$  = -105.41 (d,  $J$  = 253.3 Hz, 1F), -106.94 (d,  $J$  = 250.0 Hz, 1F), -118.35 (d,  $J$  = 252.8 Hz, 1F), -119.13 ppm (d,  $J$  = 250.1 Hz, 1F); correlations confirmed by ROESY (C13-H and C24-H) and HOESY (F and C4-H; F and C25-H, C24-H) data; IR:  $\nu$  = 2928, 2222 (CN), 1617, 1499  $\text{cm}^{-1}$ ; HRMS (ESI) calcd for  $\text{C}_{28}\text{H}_{21}\text{F}_4\text{N}_5\text{O}_2$ : 536.1710 [M+H], found: 536.1918.

**2,2'-((3-(Allyl(methyl)amino)-1,1,2,2-tetrafluoro-7a-methyl-1,2,7,7a-tetrahydroazuleno[5,4-b:7,8-b']difuran-5,9-diyl)bis(methanylylidene))malodinitrile (7-MN-meall (8d)):**

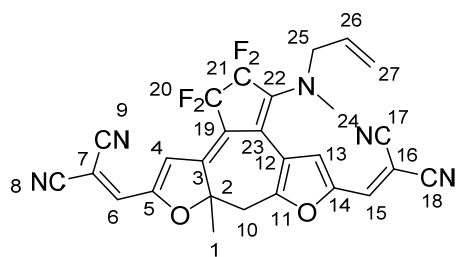

According to general procedure **8d** was obtained as dark-violet amorphous mass (11 mg, 21%) besides 7 mg (14%) starting material **7**.  $^1\text{H}$  NMR (600 MHz,  $\text{CD}_3\text{CN}$ ):  $\delta$  = 1.20 (s, 3H;  $\text{CH}_3$ ), 2.93 (s, 3H;  $\text{NCH}_3$ ), 3.41 (d,  $^2J_{\text{HH}}$  = 14.8 Hz, 1H;  $\text{CH}_2$  (C10)), 3.57 (d,  $^2J_{\text{HH}}$  = 14.8 Hz, 1H;  $\text{CH}_2$  (C10)), 3.80 (dd,  $^2J_{\text{HH}}$  = 15.0,  $J_{\text{HH}}$ (allyl) = 7 Hz, 1H;

CH<sub>2</sub> (allyl)), 3.99 (dd, <sup>2</sup>J<sub>HH</sub> = 15.0, J<sub>HH</sub>(allyl) = 6 Hz, 1H; CH<sub>2</sub> (allyl)), 5.29 (m, 2H; HCH (C27)), 5.85 (m, 1H; CH (C26)), 6.81 (s, 1H; CH (C4)), 7.39 (s, 1H; CH (C6)), 7.41 (s, 1H; CH (C13)), 7.76 ppm (s, 1H; CH (C15)); <sup>13</sup>C NMR (150 MHz, CD<sub>3</sub>CN): δ = 26.67 (C1), 39.62 (C10), 40.18 (C24), 57.70 (C25), 78.12 (C16), 81.44 (C7), 88.76 (C2), 112.60 (from HMBC data) (C23), 113.79 (C9), 114.03 (C17), 115.13 (C18), 115.57 (C8), 118.60 (overlaps with solvent peak) (C12), 120.38 (C27), 120.99 (C4), 123.35 (m, C19), 125.19 (C13), 133.68 (C26), 138.24 (C3), 143.43 (C6), 143.80 (m, C22), 144.39 (C15), 147.85 (C14), 155.01 (C5), 157.17 ppm (C11); <sup>19</sup>F NMR (376 MHz, CD<sub>3</sub>CN): δ = -106.11 (d, J = 253.7 Hz, 1F), -107.92 (d, J = 250.9 Hz, 1F), -119.11 ppm (m, 2F); correlations confirmed by NOESY (C13-H and C24-H, C25-H, C-26-H) data; IR: ν = 2226 (CN), 1615, 1508 cm<sup>-1</sup>; MS (FAB): 519 [M]; MS (ESI) for C<sub>27</sub>H<sub>17</sub>F<sub>4</sub>N<sub>5</sub>O<sub>2</sub>: 520 [M+H].

**2,2'-((3-(Dicyclohexylamino)-1,1,2,2-tetrafluoro-7a-methyl-2,7,7a-tetrahydroazuleno [5,4-b:7,8-b']difuran-5,9-diyl)bis(methanylylidene))malodinitrile (7-MN-cy (8e)):** According to

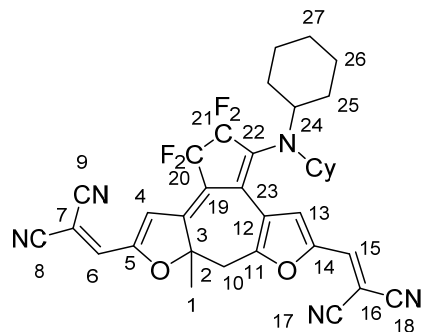

general procedure **8e** was obtained as greenish-blue solid (41 mg, 65%) besides trace amounts of starting material **7**. <sup>1</sup>H NMR (400 MHz, CD<sub>3</sub>CN): δ = 1.10 (s, 3H; CH<sub>3</sub>), 1.18 (m, 2H; CH<sub>2</sub>), 1.31 (m, 8H; CH<sub>2</sub>), 1.65 (m, 2H; CH<sub>2</sub>), 1.82 (m, 4H; CH<sub>2</sub>), 2.01 (m, 4H; CH<sub>2</sub>), 3.18 (m, 2H; NCH), 3.31 (d, <sup>2</sup>J<sub>HH</sub> = 14.5 Hz, 1H; CH<sub>2</sub> (C10)), 3.55 (d, <sup>2</sup>J<sub>HH</sub> = 14.5 Hz, 1H; CH<sub>2</sub> (C10)), 6.83 (t, J<sub>HF</sub> = 2.5 Hz, 1H; CH (C4)), 7.23 (s, 1H; CH (C6)), 7.62 (s, 1H; CH (C13)), 7.74 ppm (s, 1H; CH (C15)); <sup>13</sup>C NMR (150 MHz, CD<sub>3</sub>CN): δ = 25.00 (C26), 25.63 (C27), 26.84 (C1), 30.05 (C25), 40.52 (C10), 55.12

(C24), 77.00 (C16), 77.02 (C7), 88.83 (C2), 113.20 (m, C23), 114.14 (C17), 114.72 (C9), 115.40 (C18), 116.52 (C8), 119.34 (C12), 122.99 (C4), 125.16 (m, C19), 127.34 (C13), 133.66 (C3), 140.14 (m, C22), 141.38 (C6), 144.13 (C15), 146.47 (C14), 153.54 (C5), 156.93 ppm (C11); <sup>19</sup>F NMR (376 MHz, CD<sub>3</sub>CN): δ = -107.83 (d, J = 251.5 Hz, 1F), -108.20 (d, J = 251.8 Hz, 1F), -117.97 (d, J = 251.9 Hz, 1F), -118.16 ppm (d, J = 251.4 Hz, 1F); IR: ν = 2943, 2193 (CN), 1674 cm<sup>-1</sup>; MS (ESI) for C<sub>35</sub>H<sub>31</sub>F<sub>4</sub>N<sub>5</sub>O<sub>2</sub>: 629 [M].

**2,2'-((7a-Ethyl-1,1,2,2-tetrafluoro-7-methyl-3-(pyrrolidin-1-yl)-1,2,7,7a-tetrahydroazuleno [5,4-b:7,8-b']dithiophene-5,9-diyl)bis(methanylylidene))malodinitrile (7-T-Et-MN-pyrr (8f)):**

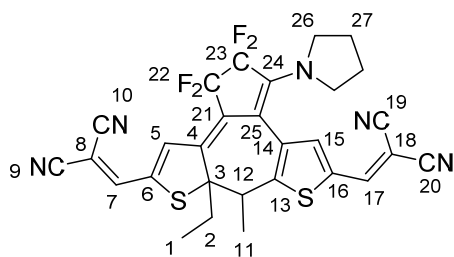

C5F-T-Et-MN (**15**) (40 mg, 0.073 mmol, 1 equiv.) was dissolved in dry benzene (10 mL). Pyrrolidine (0.05 mL) was added and the reaction mixture was stirred overnight at rt. Benzene was removed *in vacuo* and the remaining dark-green oil was filtered through a short column with silica gel using CH<sub>2</sub>Cl<sub>2</sub>/*n*-hexane 1/1 to remove unchanged starting material (9 mg, 22%) then 5/1 as eluent. Intensively colored green-blue fraction

containing product was obtained, the volatiles were evaporated, and 17 mg (40%) of **8f** were obtained as dark-green crystals. <sup>1</sup>H NMR (400 MHz, CD<sub>2</sub>Cl<sub>2</sub>): δ = 0.82 (m, 3H; CH<sub>3</sub> (C1)), 0.88 (m, 1H; CH<sub>2</sub> (C2)), 1.65 (m, 1H; CH<sub>2</sub> (C2)), 1.79 (d, <sup>3</sup>J<sub>HH</sub> = 7.0 Hz, 3H; CH<sub>3</sub> (C11)), 1.87 (m, 2H; CH<sub>2</sub> (C27)), 2.08 (m, 2H; CH<sub>2</sub> (C27)), 3.19 (m, 2H; CH<sub>2</sub> (C26)), 3.66 ((m, 2H; CH<sub>2</sub> (C26)), 3.92 (q, <sup>3</sup>J<sub>HH</sub> = 7.0 Hz, 1H; CH (C12)), 7.21 (dd, J<sub>HF</sub> = 4.4, 1.5 Hz, 1H; CH (C5)), 7.45 (s, 1H; CH (C7)), 7.61 (s, 1H; CH (C15)), 7.79 ppm (s, 1H; CH (C17)); <sup>13</sup>C NMR (150 MHz, CD<sub>2</sub>Cl<sub>2</sub>): δ = 8.66 (C1), 18.76 (C11), 25.97 (C27), 33.06 (C2), 44.57 (C12), 52.58 (C26), 73.17 (C3), 79.00 (C18), 79.89 (C8), 112.18 (m, C25), 113.58 (C10), 113.71 (C19), 114.32 (C20), 115.24

(C9), 115.58 (m, CF<sub>2</sub>), 116.05 (tt, <sup>1</sup>J<sub>CF</sub> = 259.1, <sup>2</sup>J<sub>CF</sub> = 23.6 Hz; CF<sub>2</sub>), 131.41 (C16), 132.12 (C14), 133.03 (m, C21), 136.42 (C6), 136.87 (C4), 138.65 (C15), 142.18 (C5), 143.20 (t, <sup>2</sup>J<sub>CF</sub> = 21.1 Hz; C24), 150.58 (C7), 150.94 (C17), 157.53 ppm (C13); <sup>19</sup>F NMR (376 MHz, CD<sub>2</sub>Cl<sub>2</sub>): δ = -104.83 (d, *J* = 253.4 Hz, 1F), -109.61 (d, *J* = 256.8 Hz, 1F), -112.75 (d, *J* = 253.4 Hz, 1F), -114.77 ppm (d, *J* = 256.7 Hz, 1F); IR: ν = 2971, 2216 (CN), 1574, 1439 cm<sup>-1</sup>; MS (MALDI-TOF): 579 [M]; HRMS (ESI) calcd for C<sub>29</sub>H<sub>21</sub>F<sub>4</sub>N<sub>5</sub>S<sub>2</sub>: 580.1253 [M+H], found: 580.1242.

**2,2'-((3-(Dicyanomethyl)-1,1,2,2-tetrafluoro-7a-methyl-1,2,7,7a-tetrahydroazuleno[5,4-b:7,8-b']difuran-5,9-diyl)bis(methanylylidene))malodinitrile (7-MN-MN (8g)):** C5F-CHO (6)

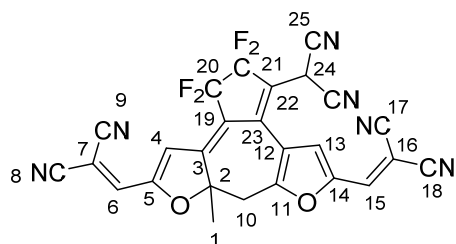

(50 mg, 0.127 mmol) and malodinitrile (19 mg, 0.28 mmol) were dissolved in dry benzene (10 mL). DIPEA (0.05 mL, 0.29 mmol) was added and the reaction mixture was stirred for 3 h at rt. Benzene was removed *in vacuo* and the remaining greenish solid was purified by column chromatography using *n*-hexane/EtOAc 1/1 as eluent. A small amount of C5F-MN (7) was isolated

(3 mg, 4%), whereas a green-colored fraction remained at the column start. Subsequent addition of methanol eluted a polar deep-green fraction. Volatiles were removed, and 7-MN-MN (8g) was obtained as dark-blue solid (6 mg, 9%). <sup>1</sup>H NMR (600 MHz, CD<sub>3</sub>CN): δ = 1.10 (s, 3H; CH<sub>3</sub>), 3.31 (d, <sup>2</sup>J<sub>HH</sub> = 14.5 Hz, 1H; CH<sub>2</sub> (C10)), 3.55 (d, <sup>2</sup>J<sub>HH</sub> = 14.5 Hz, 1H; CH<sub>2</sub> (C10)), 6.84 (t, *J*<sub>HF</sub> = 2.3 Hz, 1H; CH (C4), 7.23 (s, 1H; CH (C6)), 7.61 (s, 1H; CH (C13)), 7.74 ppm (s, 1H; CH (C15)); <sup>13</sup>C NMR (150 MHz, CD<sub>3</sub>CN): δ = 26.83 (C1), 40.49 (C10), 76.95 (C16), 76.98 (C7), 88.82 (C2), 105.98 (C24), 113.21 (m, C23), 114.15 (C17), 114.72 (C9), 115.40 (C18), 116.52 (C8), 119.30 (C12), 120.44 (C25), 123.00 (C4), 125.12 (m, C19), 127.36 (C13), 133.65 (C3), 140.11 (m, C22), 141.39 (C6), 144.15 (C15), 146.45 (C14), 153.53 (C5), 156.94 ppm (C11); <sup>19</sup>F NMR (376 MHz, CD<sub>3</sub>CN): δ = -107.84 (d, *J* = 251.6 Hz, 1F), -108.23 (d, *J* = 251.7 Hz, 1F), -118.01 (d, *J* = 251.6 Hz, 1F), -118.18 ppm (d, *J* = 251.7 Hz, 1F); IR: ν = 2193 (CN) cm<sup>-1</sup>; HRMS (ESI, neg. mode) calcd for C<sub>26</sub>H<sub>10</sub>F<sub>4</sub>N<sub>6</sub>O<sub>2</sub>: 513.0729 [M-H], found: 513.0740.

**(2Z,2'Z)-3,3'-((1,1,2,2-Tetrafluoro-3-methoxy-7a-methyl-1,2,7,7a-tetrahydroazuleno[5,4-b:7,8-b']difuran-5,9-diyl)bis(2-(pyridin-4-yl)acrylonitrile) (7-MN-4PyOMe (17)):** C5F-CHO

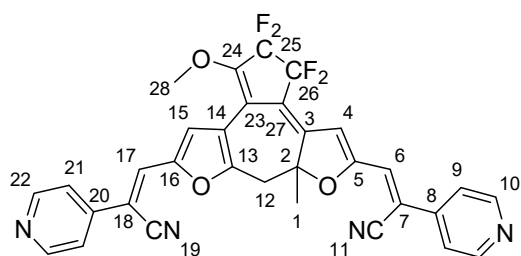

(6) (0.1 g, 0.25 mmol) and pyridine-4-acetonitrile hydrochloride (0.08 g, 0.5 mmol) were dissolved in dry MeOH (10 mL). After the addition of K<sub>2</sub>CO<sub>3</sub> (0.176 g, 1.27 mmol), the reaction mixture was stirred for 48 h at rt. After addition of diethyl ether (50 mL) the obtained mixture was washed consecutively with water (30 mL), aqueous K<sub>2</sub>CO<sub>3</sub> (30 mL) and again with water (30 mL). The

organic fraction was dried over MgSO<sub>4</sub>, and the volatiles were removed *in vacuo*. The dark residue was purified by column chromatography on SiO<sub>2</sub> (*n*-hexane/EtOAc 1:1) giving C5F-4Py (16) (0.12 g, 77%) [Fully characterized in ref. 2]. Further elution with EtOAc provided 7-MN-4PyOMe (17) as byproduct in form of an orange solid (11 mg, 7%). <sup>1</sup>H NMR (600 MHz, CDCl<sub>3</sub>): δ = 1.49 (s, 3H; CH<sub>3</sub> (C1)), 3.46 (d, <sup>2</sup>J<sub>HH</sub> = 15.8 Hz, 1H; CH<sub>2</sub> (C12)), 3.76 (d, <sup>2</sup>J<sub>HH</sub> = 15.8 Hz, 1H; CH<sub>2</sub> (C12)), 4.21 (s, 3H; OMe), 6.59 (br, 1H; CH (C4)), 7.21 (s, 1H; CH (C6)), 7.55 (s, 1H; CH (C17)), 7.56 (m, 4H; CH (C9 and C21)), 7.95 (s, 1H; CH (C15)), 8.72 ppm (m, 4H; CH (C10 and C22)); <sup>13</sup>C NMR (150 MHz, CDCl<sub>3</sub>): δ = 26.42 (C1), 38.64 (C12), 58.86 (C28), 87.88 (C2), 105.86 (C18), 111.90 (C7), 113.67 (C4), 115.80 (C11), 115.83 (C14), 116.51 (C19), 116.67 (m, C27), 117.27 (m, C23), 118.38 (C15), 119.78 (C9/C21), 120.15 (C9/C21), 129.08

(C6), 129.78 (C17), 141.06 (C8), 141.40 (C20), 143.27 (C3), 146.39 (t,  $^2J_{CF} = 22$  Hz; C24), 148.50 (C16), 150.37 (C10/C22), 150.72 (C10/C22), 153.69 (C13), 157.32 ppm (C5);  $^{19}\text{F}$  NMR (376 MHz,  $\text{CDCl}_3$ ):  $\delta = -107.70$  (d,  $J = 260$  Hz, 1F),  $-109.82$  (d,  $J = 250$  Hz, 1F),  $-114.41$  (d,  $J = 260$  Hz, 1F),  $-115.13$  ppm (d,  $J = 250$  Hz; 1F); MS (FAB): 584 [M]; HRMS (ESI) calcd for  $\text{C}_{32}\text{H}_{20}\text{F}_4\text{N}_4\text{O}_3$ : 585.1544 [M+H], found: 585.1556.

**5,9-Diethynyl-1,1,2,2-tetrafluoro-3-methoxy-7a-methyl-1,2,7,7a-tetrahydroazuleno[5,4-b:7,8-b']difuran (7-yne-OMe (20)):** Dimethyldiazomethylphosphonate (235 mg, 1.22 mmol, 2.4 equiv.) was added to a Schlenk flask containing C5F-CHO (6) (200 mg, 0.51 mmol) and potassium carbonate (281 mg, 2.04 mmol, 4 equiv.) in dry methanol (20 mL). The reaction mixture was stirred for 90 min. MeOH was removed *in vacuo*, and the remaining brown oil was purified by column chromatography (*n*-hexane/EtOAc 10/1). 73 mg (37%) of pure C5F-yne (18)<sup>[4]</sup> and 14 mg (7 %) of yellow oil containing unstable 7-yne-OMe (20) were separated from the darkening mixture of oligomers.

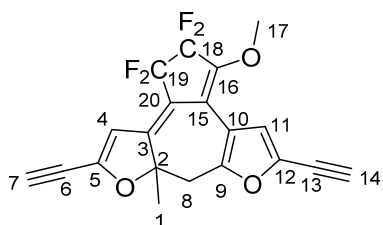

$^1\text{H}$  NMR (400 MHz,  $\text{CDCl}_3$ ):  $\delta = 1.35$  (s, 3H;  $\text{CH}_3$ ), 3.25 (d,  $^2J_{\text{HH}} = 15.9$  Hz, 1H;  $\text{CH}_2$  (C8)), 3.41 (d,  $^2J_{\text{HH}} = 15.9$  Hz, 1H;  $\text{CH}_2$  (C8)), 3.43 (s, 1H; *sp*CH), 3.43 (s, 1H; *sp*CH), 4.08 (s, 3H; OMe), 6.32 (t,  $J_{\text{HF}} = 2.1$  Hz, 1H; CH (C4), 7.23 ppm (s, 1H; CH (C11));  $^{13}\text{C}$  NMR (150 MHz,  $\text{CDCl}_3$ ):  $\delta = 25.88$  (C1), 38.19 (C8), 58.47 (OMe), 73.27 (C13), 74.47 (C6), 82.73 (C14), 84.84 (C7), 86.52 (C2), 110.46 (C4), 113.32 (t,  $^2J_{CF} = 22.1$  Hz; C20), 113.43 (C10), 115.33 (m,  $\text{CF}_2$ ), 116.01 ( $\text{CF}_2$ ), 117.25 (m, C15), 117.37 (C11), 135.20 (C12), 143.98 (t,  $J_{CF} = 2.7$  Hz; C3), 144.42 (t,  $^2J_{CF} = 20.3$  Hz; C16), 144.50 (C5), 151.03 ppm (C9);  $^{19}\text{F}$  NMR (376 MHz,  $\text{CDCl}_3$ ):  $\delta = -107.38$  (d,  $J = 258.2$  Hz, 1F),  $-110.21$  (d,  $J = 248.6$  Hz, 1F),  $-114.80$  (d,  $J = 258.7$  Hz, 1F),  $-115.64$  ppm (d,  $J = 248.8$  Hz, 1F); MS (EI, 70 eV) for  $\text{C}_{20}\text{H}_{12}\text{F}_4\text{O}_3$ : 376 [M].

**2,2'-((3-(Dicyanomethyl)-7a-ethyl-1,1,2,2-tetrafluoro-7-methyl-1,2,7,7a-tetrahydroazuleno[5,4-b:7,8-b']difuran-5,9-diyl)bis(methanylylidene))malodinitrile (7-Et-MN-MN (8h)):** C5F-Et-MN (12) (50 mg, 0.1 mmol) and malodinitrile (13.5 mg, 0.2 mmol) were dissolved in dry dioxane (5 mL). Diisopropylethylamine (0.1 mL) was added, and the reaction mixture turned blue and changed to green within several seconds. After stirring overnight at r. t. the volatiles were removed *in vacuo*, and the resulting dark-green oil was purified by column chromatography (*n*-hexane/EtOAc 1/1 to remove the starting materials (14 mg, 27%), then MeOH to elute 16 mg (29%) of 7-Et-MN-MN (8h) as green solid.

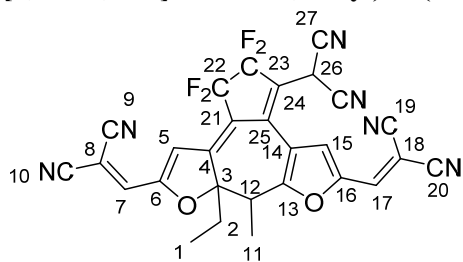

$^1\text{H}$  NMR (400 MHz,  $\text{CD}_3\text{OD}$ ):  $\delta = 0.68$  (m, 3H;  $\text{CH}_3$  (C1)), 0.69 (m, 1H;  $\text{CH}_2$ ), 1.75 (d,  $^3J_{\text{HH}} = 7.0$  Hz, 3H;  $\text{CH}_3$  (C11)), 1.85 (m, 1H;  $\text{CH}_2$ ), 3.48 (q,  $^3J_{\text{HH}} = 7.0$  Hz, 1H; CH (C12)), 6.97 (t,  $J_{\text{HF}} = 2.1$  Hz, 1H; CH (C5)), 7.43 (s, 1H; CH (C7)), 7.59 (s, 1H; CH (C15)), 7.93 ppm (s, 1H; CH (C17));  $^{13}\text{C}$  NMR (150 MHz,  $\text{CD}_3\text{OD}$ ):  $\delta = 7.51$  (C1), 10.87 (C11), 29.81 (C2), 45.62 (C12), 76.71 (C18), 77.42 (C8), 94.26 (C3), 114.32 (C19), 114.56 (m, C25), 114.84 (C10), 115.51 (C20), 116.38 (C9), 118.70 (C14), 121.31 (C27), 124.40 (C5), 126.45 (m, C21), 127.74 (C15), 134.11 (C4), 140.41 (m, C24), 141.23 (C7), 144.73 (C17), 146.80 (C16), 154.80 (C6), 161.05 ppm (C13);  $^{19}\text{F}$  NMR (376 MHz,  $\text{CD}_3\text{OD}$ ):  $\delta = -108.70$  (d,  $J = 251.8$  Hz, 1F),  $-108.93$  (d,  $J = 253.2$  Hz, 1F),  $-118.72$  (d,  $J = 251.9$  Hz, 1F),  $-118.88$  ppm (d,  $J = 252.8$  Hz; 1F); IR:  $\nu = 2197$  (CN)  $\text{cm}^{-1}$ ; MS (MALDI-TOF, neg. mode): 541 [M-H]; HRMS (ESI, neg. mode) calcd for  $\text{C}_{28}\text{H}_{14}\text{F}_4\text{N}_6\text{O}_2$ : 541.1031 [M-H], found: 541.1078.

**8a-Ethyl-1,1,2,2-tetrafluoro-3-hydroxy-8-methyl-5a,10a-bisphenylethynyl-1,2,8a-tetrahydroazuleno[5,4-b:7,8-b']dibenzothiophene 7,7,9,9-tetraoxide (7-BTSO2Et-PhCC-OH (22)):**

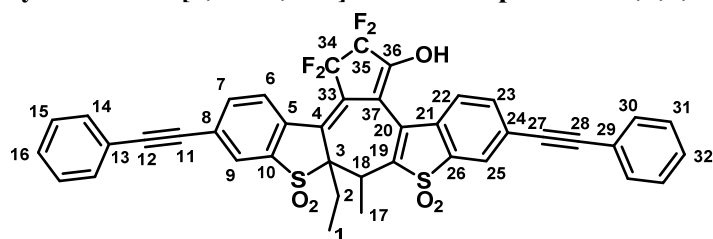

(22)): Diiodo DAE **21** (44 mg, 0.054 mmol), phenyl acetylene (22 mg, 0.20 mmol, 0.023 ml) and triethylamine (0.1 ml, 0.72 mmol) were dissolved in THF (5 ml), and the solution was degassed. Pd(amphos)<sub>2</sub>Cl<sub>2</sub> (7.6 mg, 0.011

mmol) and CuI (1 mg, 0.005 mmol) were added, and the reaction mixture was stirred overnight under nitrogen at 50°C. Volatiles were removed in vacuo, and the remaining brown oil was purified by column chromatography on silica gel using dichloromethane, EtOAc and EtOAc/acetone 10:1 subsequently as eluents. The only isolated product was enol 7-BTSO<sub>2</sub>Et-PhCC-OH (**22**) (21 mg, 52%); none of the starting material diiodo DAE **21** was recovered. <sup>1</sup>H NMR (600 MHz, acetone-*d*<sub>6</sub>): δ = 0.59 (t, <sup>3</sup>J<sub>HH</sub> = 7.5 Hz, 3H; CH<sub>3</sub> (C1)), 1.93 (d, <sup>3</sup>J<sub>HH</sub> = 7.2 Hz, 3H; CH<sub>3</sub> (C17)), 2.19 (dq, <sup>2</sup>J<sub>HH</sub> = 14.9, <sup>3</sup>J<sub>HH</sub> = 7.4 Hz, 1H; CH<sub>2</sub> (C2)), 2.36 (dq, <sup>2</sup>J<sub>HH</sub> = 15.2, <sup>3</sup>J<sub>HH</sub> = 7.6 Hz, 1H; CH<sub>2</sub> (C2)), 3.87 (q, <sup>3</sup>J<sub>HH</sub> = 7.2 Hz, 1H; CH (C18)), 7.44 (m, 6H; CH (C15, C16, C31 and C32)), 7.61 (m, 4H; CH (C14 and C30)), 7.69 (dd, <sup>3</sup>J<sub>HH</sub> = 8.1, <sup>4</sup>J<sub>HH</sub> = 1.6 Hz, 1H; CH (C7)), 7.70 (dd, <sup>3</sup>J<sub>HH</sub> = 8.3, <sup>4</sup>J<sub>HH</sub> = 1.6 Hz, 1H; CH (C23)), 7.71 (d, <sup>4</sup>J<sub>HH</sub> = 1.6 Hz, 1H; CH (C9)), 7.76 (d, <sup>4</sup>J<sub>HH</sub> = 1.5 Hz, 1H; CH (C25)), 7.80 (dd, <sup>3</sup>J<sub>HH</sub> = 8.3, J<sub>HF</sub> = 4.9 Hz, 1H; CH (C6)), 7.83 ppm (d, <sup>3</sup>J<sub>HH</sub> = 8.0 Hz, 1H; CH (C22)); <sup>13</sup>C NMR (150 MHz, acetone-*d*<sub>6</sub>): δ = 10.00 (C17), 11.61 (C1), 28.29 (C2), 37.66 (C18), 78.90 (C3), 88.78 (C27), 88.92 (C11), 91.66 and 92.59 (C12 and C28), 103.42 (C37), 111.45 (C4), 121.99 (C8), 122.69 (C25), 123.49 and 123.66 (C13 and C29), 124.23 (C9), 124.72 (C24), 127.64 (m, C6), 128.57 (C22), 129.48 and 129.50 (C15 and C31), 129.62 and 129.80 (C16 and C32), 131.83 (C21), 132.44 and 132.52 (C14 and C30), 134.34 (br, C19), 135.89 (t, <sup>2</sup>J<sub>CF</sub> = 20 Hz; C33), 135.99 (C7), 136.18 (C23), 136.90 (C10), 138.52 (C20), 139.42 (C26), 140.77 (C5), 172.34 ppm (t, <sup>2</sup>J<sub>CF</sub> = 21 Hz; C36); signals of C34 and C35 mix with noise background; <sup>19</sup>F NMR (376 MHz, acetone-*d*<sub>6</sub>): δ = -94.80 (d, J = 242 Hz, 1F), -117.87 (d, J = 262 Hz, 1F), -124.32 (d, J = 242 Hz, 1F), -134.29 ppm (d, J = 262 Hz, 1F); IR: ν = 3490 (br), 2965, 1549, 1285 cm<sup>-1</sup>; HRMS (ESI, neg. mode) calcd for C<sub>41</sub>H<sub>26</sub>F<sub>4</sub>O<sub>5</sub>S<sub>2</sub> [M-H]: 737.1074, found: 737.1100.

**1,1,2,2,3-pentafluoro-7a-methyl-5,9-bis((E)-4-(methylthio)styryl)-1,2,7,7a-tetrahydroazuleno[5,4-b:7,8-b']difuran (7-4SMe (23)):**

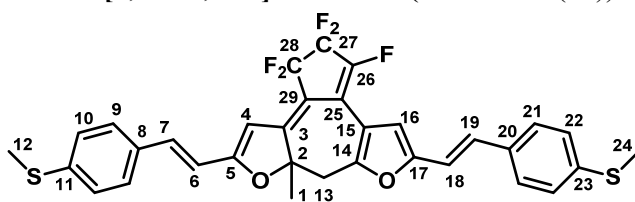

(7-4SMe (**23**)): 4-Methylthiobenzyltriphenylphosphonium bromide (670 mg, 1.4 mmol) was suspended in dry methanol (50 ml) containing MeONa (170 mg, 3.1 mmol). After stirring for 15 min, C5F-CHO (**6**) (250 mg, 0.64 mmol) was added, and the reaction mixture was stirred overnight at

r.t. The reaction mixture was neutralized with aqueous ammonium chloride and concentrated in vacuo. The oily residue was mixed with dichloromethane (150 ml) and water (50 ml). Organic phase was separated, dried over MgSO<sub>4</sub>, and the volatiles were removed. The remaining dark-blue solid was collected to provide DAE C5F-4SMe (**24**) (170 mg, 41%). The greenish residue in the flask was dissolved in dichloromethane and filtered through a short column filled with silica with dichloromethane as eluent. 7-4-SMe (**23**) was collected in milligram quantities from several batches of C5F-4-SMe (**24**) synthesis as greenish solid.<sup>[2]</sup> <sup>1</sup>H NMR (600 MHz, CDCl<sub>3</sub>): δ = 1.47 (s, 3H; CH<sub>3</sub> (C1)), 2.51 (broad s, 6H; CH<sub>3</sub> (C12 and C24)), 3.40 (d, <sup>2</sup>J<sub>HH</sub> = 15.7 Hz, 1H; CH<sub>2</sub> (C13)), 3.52 (d, <sup>2</sup>J<sub>HH</sub> = 15.8 Hz, 1H; CH<sub>2</sub> (C13)), 6.08 (br, 1H; CH (C4)), 6.68 (d, <sup>3</sup>J<sub>HH</sub> = 16.0

Hz, 1H; CH (C6)), 6.74 (d,  $J_{\text{HF}} = 2.7$  Hz, 1H; CH (C16)), 6.82 (d,  $^3J_{\text{HH}} = 16.2$  Hz, 1H; CH (C18)), 7.05 (d,  $^3J_{\text{HH}} = 16.2$  Hz, 1H; CH (C19)), 7.15 (d,  $^3J_{\text{HH}} = 15.8$  Hz, 1H; CH (C7)), 7.24 (d,  $^3J_{\text{HH}} = 8.3$  Hz, 2H; CH (C10)), 7.25 (d,  $^3J_{\text{HH}} = 8.3$  Hz, 2H; CH (C22)), 7.41 (d,  $^3J_{\text{HH}} = 8.3$  Hz, 2H; CH (C21)), 7.42 ppm (d,  $^3J_{\text{HH}} = 8.3$  Hz, 2H; CH (C9)); carbon shift values were assigned using data from HSQC and HMBC spectra:  $\delta = 15.5$  (C12 and C24), 26.3 (C1), 37.9 (C13), 86.5 (C2), 103.3 (C4), 108.3 (C16), 112.3 (C15), 114.9 (C18), 115.1 (C6), 126.2 (C10), 126.8 (C21), 127.2 (C22), 127.6 (C9), 128.3 (C19), 132.3 (C8), 133.3 (C20), 135.1 (C7), 138.5 (C23), 140.2 (C11), 150.6 (C3), 150.7 (C14), 152.9 (C17), 163.4 ppm (C5);  $^{19}\text{F}$  NMR (376 MHz,  $\text{CDCl}_3$ ):  $\delta = -110.66$  (d,  $J = 248$  Hz, 1F),  $-114.51$  (dd,  $J = 253, 16.8$  Hz, 1F),  $-116.11$  (d,  $J = 248$  Hz, 1F),  $-122.31$  (dd,  $J = 253, 13.6$  Hz, 1F),  $-145.05$  ppm (dd,  $J = 16.7, 13.6$  Hz; 1F); MS (FAB): 612 [M<sup>+</sup>].

### (C) Crystallographic Data

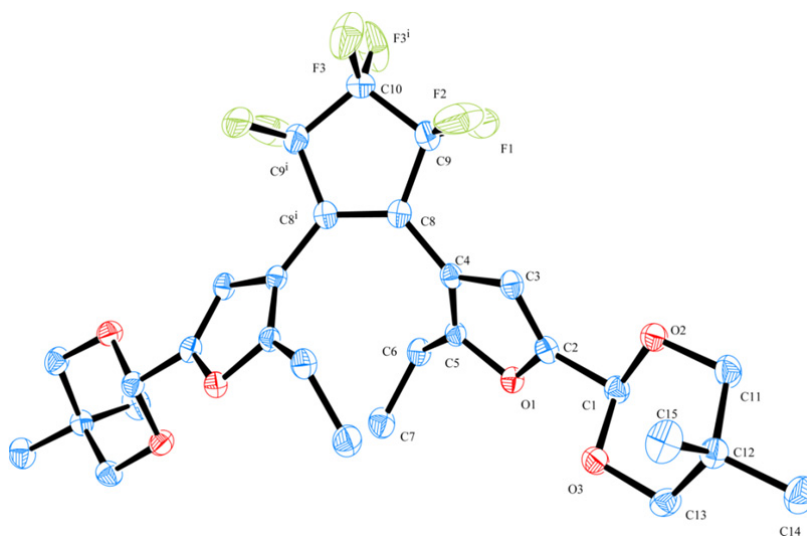

**Figure S1.** ORTEP of **C5F-Et-NPA** with ellipsoids drawn at the 50% level and hydrogen atoms omitted for clarity.

**Table S1.** Crystal data and structure refinement parameters for **C5F-Et-NPA**

| <b>C5F-Et-NPA (CCDC 1037923)</b>  |                                                                                                           |
|-----------------------------------|-----------------------------------------------------------------------------------------------------------|
| Empirical formula                 | C <sub>29</sub> H <sub>34</sub> F <sub>6</sub> O <sub>6</sub>                                             |
| Formula weight                    | 592.56                                                                                                    |
| Temperature                       | 100(2) K                                                                                                  |
| Wavelength                        | 0.71073 Å                                                                                                 |
| Crystal system                    | Monoclinic                                                                                                |
| Space group                       | C 2/c                                                                                                     |
| Unit cell dimensions              | a = 21.3540(16) Å      α = 90°<br>b = 12.3394(10) Å      β = 101.844(6)°<br>c = 10.9586(8) Å      γ = 90° |
| Volume                            | 2826.1(4) Å <sup>3</sup>                                                                                  |
| Z                                 | 4                                                                                                         |
| Density (calculated)              | 1.393 Mg/m <sup>3</sup>                                                                                   |
| Absorption coefficient            | 0.122 mm <sup>-1</sup>                                                                                    |
| F(000)                            | 1240                                                                                                      |
| Crystal size                      | 0.400 x 0.400 x 0.400 mm <sup>3</sup>                                                                     |
| Theta range for data collection   | 1.917 to 25.767°                                                                                          |
| Index ranges                      | -25 ≤ h ≤ 25, -15 ≤ k ≤ 14, -13 ≤ l ≤ 13                                                                  |
| Reflections collected             | 17707                                                                                                     |
| Independent reflections           | 2669 [R(int) = 0.1355]                                                                                    |
| Completeness to theta = 25.242°   | 100.0 %                                                                                                   |
| Absorption correction             | Integration                                                                                               |
| Max. and min. transmission        | 0.9829 and 0.9680                                                                                         |
| Refinement method                 | Full-matrix least-squares on F <sup>2</sup>                                                               |
| Data / restraints / parameters    | 2669 / 0 / 186                                                                                            |
| Goodness-of-fit on F <sup>2</sup> | 0.953                                                                                                     |
| Final R indices [I > 2σ(I)]       | R <sub>1</sub> = 0.0551, wR <sub>2</sub> = 0.1111                                                         |
| R indices (all data)              | R <sub>1</sub> = 0.0975, wR <sub>2</sub> = 0.1255                                                         |
| Largest diff. peak and hole       | 0.201 and -0.384 e.Å <sup>-3</sup>                                                                        |



**Table S2.** Atomic coordinates (  $\times 10^4$ ) and equivalent isotropic displacement parameters ( $\text{\AA}^2 \times 10^3$ ) for **C5F-Et-NPA**.

U(eq) is defined as one third of the trace of the orthogonalized Uij tensor.

|       | x       | y        | z        | U(eq) |
|-------|---------|----------|----------|-------|
| C(1)  | 1871(1) | 6781(2)  | 575(2)   | 22(1) |
| C(2)  | 1403(1) | 7329(2)  | -429(2)  | 20(1) |
| C(3)  | 1084(1) | 8269(2)  | -448(2)  | 20(1) |
| C(4)  | 715(1)  | 8393(2)  | -1693(2) | 19(1) |
| C(5)  | 847(1)  | 7522(2)  | -2356(2) | 20(1) |
| C(6)  | 681(1)  | 7211(2)  | -3697(2) | 23(1) |
| C(7)  | 342(1)  | 6126(2)  | -3985(3) | 30(1) |
| C(8)  | 298(1)  | 9313(2)  | -2148(2) | 21(1) |
| C(9)  | 526(1)  | 10437(2) | -1819(3) | 31(1) |
| C(10) | 0       | 11200(3) | -2500    | 24(1) |
| C(11) | 2480(1) | 7092(2)  | 2569(2)  | 28(1) |
| C(12) | 2232(1) | 6053(2)  | 3056(2)  | 23(1) |
| C(13) | 2034(1) | 5309(2)  | 1940(2)  | 26(1) |
| C(14) | 2779(1) | 5532(3)  | 3994(3)  | 33(1) |
| C(15) | 1661(1) | 6294(3)  | 3658(3)  | 35(1) |
| F(1)  | 1088(1) | 10649(2) | -2157(3) | 72(1) |
| F(2)  | 635(1)  | 10618(2) | -576(2)  | 70(1) |
| F(3)  | -216(1) | 11838(2) | -1703(2) | 59(1) |
| O(1)  | 1269(1) | 6849(1)  | -1588(2) | 21(1) |
| O(2)  | 2026(1) | 7540(1)  | 1542(2)  | 25(1) |
| O(3)  | 1592(1) | 5835(2)  | 946(2)   | 25(1) |

**Table S3.** Bond lengths [Å] and angles [°] for **C5F-Et-NPA**

|                  |            |                     |            |              |          |
|------------------|------------|---------------------|------------|--------------|----------|
| C(1)-O(2)        | 1.402(3)   | C(5)-C(6)           | 1.489(3)   | C(10)-C(9)#1 | 1.536(4) |
| C(1)-O(3)        | 1.409(3)   | C(6)-C(7)           | 1.525(4)   | C(11)-O(2)   | 1.437(3) |
| C(1)-C(2)        | 1.489(3)   | C(8)-C(8)#1         | 1.347(5)   | C(11)-C(12)  | 1.524(4) |
| C(2)-C(3)        | 1.343(4)   | C(8)-C(9)           | 1.490(4)   | C(12)-C(13)  | 1.518(4) |
| C(2)-O(1)        | 1.377(3)   | C(9)-F(2)           | 1.352(3)   | C(12)-C(15)  | 1.530(4) |
| C(3)-C(4)        | 1.437(3)   | C(9)-F(1)           | 1.353(3)   | C(12)-C(14)  | 1.531(4) |
| C(4)-C(5)        | 1.359(3)   | C(9)-C(10)          | 1.536(4)   | C(13)-O(3)   | 1.440(3) |
| C(4)-C(8)        | 1.465(3)   | C(10)-F(3)          | 1.327(3)   |              |          |
| C(5)-O(1)        | 1.378(3)   | C(10)-F(3)#1        | 1.327(3)   |              |          |
|                  |            |                     |            |              |          |
| O(2)-C(1)-O(3)   | 112.55(19) | F(2)-C(9)-C(10)     | 110.2(2)   |              |          |
| O(2)-C(1)-C(2)   | 105.9(2)   | F(1)-C(9)-C(10)     | 110.5(2)   |              |          |
| O(3)-C(1)-C(2)   | 109.22(19) | C(8)-C(9)-C(10)     | 106.5(2)   |              |          |
| C(3)-C(2)-O(1)   | 110.4(2)   | F(3)-C(10)-F(3)#1   | 107.2(3)   |              |          |
| C(3)-C(2)-C(1)   | 131.7(2)   | F(3)-C(10)-C(9)     | 111.24(13) |              |          |
| O(1)-C(2)-C(1)   | 117.9(2)   | F(3)#1-C(10)-C(9)   | 111.41(14) |              |          |
| C(2)-C(3)-C(4)   | 106.5(2)   | F(3)-C(10)-C(9)#1   | 111.41(14) |              |          |
| C(5)-C(4)-C(3)   | 106.8(2)   | F(3)#1-C(10)-C(9)#1 | 111.24(13) |              |          |
| C(5)-C(4)-C(8)   | 127.5(2)   | C(9)-C(10)-C(9)#1   | 104.4(3)   |              |          |
| C(3)-C(4)-C(8)   | 125.6(2)   | O(2)-C(11)-C(12)    | 111.8(2)   |              |          |
| C(4)-C(5)-O(1)   | 109.4(2)   | C(13)-C(12)-C(11)   | 106.6(2)   |              |          |
| C(4)-C(5)-C(6)   | 134.3(2)   | C(13)-C(12)-C(15)   | 110.5(2)   |              |          |
| O(1)-C(5)-C(6)   | 116.1(2)   | C(11)-C(12)-C(15)   | 110.6(2)   |              |          |
| C(5)-C(6)-C(7)   | 115.9(2)   | C(13)-C(12)-C(14)   | 109.6(2)   |              |          |
| C(8)#1-C(8)-C(4) | 129.17(13) | C(11)-C(12)-C(14)   | 108.4(2)   |              |          |
| C(8)#1-C(8)-C(9) | 111.23(14) | C(15)-C(12)-C(14)   | 111.0(2)   |              |          |
| C(4)-C(8)-C(9)   | 119.6(2)   | O(3)-C(13)-C(12)    | 111.6(2)   |              |          |
| F(2)-C(9)-F(1)   | 105.4(2)   | C(2)-O(1)-C(5)      | 106.85(19) |              |          |
| F(2)-C(9)-C(8)   | 112.2(2)   | C(1)-O(2)-C(11)     | 110.6(2)   |              |          |
| F(1)-C(9)-C(8)   | 112.2(2)   | C(1)-O(3)-C(13)     | 109.96(18) |              |          |

---

Symmetry transformations used to generate equivalent atoms: #1 -x,y,-z-1/2

**Table S4.** Anisotropic displacement parameters ( $\text{\AA}^2 \times 10^3$ ) for **C5F-Et-NPA**.The anisotropic displacement factor exponent takes the form:  $-2\pi^2 [ h^2 a^* 2U^{11} + \dots + 2 h k a^* b^* U^{12} ]$ 

|       | U11    | U22   | U33    | U23    | U13    | U12   |
|-------|--------|-------|--------|--------|--------|-------|
| C(1)  | 19(1)  | 24(1) | 23(1)  | 1(1)   | 5(1)   | -1(1) |
| C(2)  | 18(1)  | 25(1) | 18(1)  | -1(1)  | 4(1)   | -3(1) |
| C(3)  | 17(1)  | 26(2) | 18(1)  | -2(1)  | 4(1)   | -1(1) |
| C(4)  | 15(1)  | 22(1) | 20(1)  | 1(1)   | 5(1)   | -3(1) |
| C(5)  | 15(1)  | 21(1) | 22(1)  | 2(1)   | 3(1)   | -1(1) |
| C(6)  | 21(1)  | 29(2) | 20(1)  | 0(1)   | 4(1)   | 1(1)  |
| C(7)  | 28(1)  | 34(2) | 28(2)  | -11(1) | 1(1)   | 2(1)  |
| C(8)  | 19(1)  | 27(2) | 18(1)  | 0(1)   | 6(1)   | 1(1)  |
| C(9)  | 23(1)  | 30(2) | 37(2)  | -6(1)  | -1(1)  | -2(1) |
| C(10) | 27(2)  | 22(2) | 24(2)  | 0      | 7(2)   | 0     |
| C(11) | 25(1)  | 32(2) | 24(1)  | 4(1)   | -2(1)  | -4(1) |
| C(12) | 22(1)  | 27(2) | 21(1)  | 4(1)   | 5(1)   | 0(1)  |
| C(13) | 28(1)  | 24(2) | 26(1)  | 7(1)   | 7(1)   | 2(1)  |
| C(14) | 31(1)  | 39(2) | 26(2)  | 7(1)   | 1(1)   | 2(1)  |
| C(15) | 34(2)  | 49(2) | 25(2)  | 3(1)   | 12(1)  | 6(1)  |
| F(1)  | 21(1)  | 30(1) | 168(2) | 4(1)   | 27(1)  | -4(1) |
| F(2)  | 115(2) | 32(1) | 40(1)  | -14(1) | -38(1) | 19(1) |
| F(3)  | 42(1)  | 81(2) | 48(1)  | -36(1) | -5(1)  | 28(1) |
| O(1)  | 18(1)  | 23(1) | 20(1)  | -1(1)  | 4(1)   | 1(1)  |
| O(2)  | 27(1)  | 24(1) | 21(1)  | 2(1)   | -2(1)  | -2(1) |
| O(3)  | 25(1)  | 24(1) | 24(1)  | 4(1)   | 0(1)   | -4(1) |

**Table S5.** Hydrogen coordinates (  $\times 10^4$ ) and isotropic displacement parameters ( $\text{\AA}^2 \times 10^{-3}$ ) for **C5F-Et-NPA**.

|        | x    | y    | z     | U(eq) |
|--------|------|------|-------|-------|
| H(1)   | 2256 | 6591 | 265   | 26    |
| H(3)   | 1099 | 8745 | 214   | 24    |
| H(6A)  | 1073 | 7194 | -4016 | 28    |
| H(6B)  | 411  | 7773 | -4147 | 28    |
| H(7A)  | 256  | 6002 | -4869 | 46    |
| H(7B)  | -53  | 6136 | -3697 | 46    |
| H(7C)  | 610  | 5556 | -3571 | 46    |
| H(11A) | 2570 | 7620 | 3238  | 33    |
| H(11B) | 2877 | 6939 | 2303  | 33    |
| H(13A) | 2411 | 5087 | 1639  | 31    |
| H(13B) | 1835 | 4664 | 2195  | 31    |
| H(14A) | 2903 | 6003 | 4699  | 50    |
| H(14B) | 3138 | 5416 | 3606  | 50    |
| H(14C) | 2639 | 4851 | 4266  | 50    |
| H(15A) | 1793 | 6768 | 4358  | 53    |
| H(15B) | 1502 | 5629 | 3934  | 53    |
| H(15C) | 1329 | 6637 | 3059  | 53    |

**Table S6.** Torsion angles [°] for **C5F-Et-NPA**.

|                        |            |                        |            |
|------------------------|------------|------------------------|------------|
| O(2)-C(1)-C(2)-C(3)    | -10.0(3)   | F(1)-C(9)-C(10)-F(3)   | -116.3(2)  |
| O(3)-C(1)-C(2)-C(3)    | 111.4(3)   | C(8)-C(9)-C(10)-F(3)   | 121.6(2)   |
| O(2)-C(1)-C(2)-O(1)    | 166.99(18) | F(2)-C(9)-C(10)-F(3)#1 | 119.3(3)   |
| O(3)-C(1)-C(2)-O(1)    | -71.6(3)   | F(1)-C(9)-C(10)-F(3)#1 | 3.3(3)     |
| O(1)-C(2)-C(3)-C(4)    | 0.8(3)     | C(8)-C(9)-C(10)-F(3)#1 | -118.8(2)  |
| C(1)-C(2)-C(3)-C(4)    | 178.0(2)   | F(2)-C(9)-C(10)-C(9)#1 | -120.5(2)  |
| C(2)-C(3)-C(4)-C(5)    | -1.3(3)    | F(1)-C(9)-C(10)-C(9)#1 | 123.4(2)   |
| C(2)-C(3)-C(4)-C(8)    | -179.1(2)  | C(8)-C(9)-C(10)-C(9)#1 | 1.35(11)   |
| C(3)-C(4)-C(5)-O(1)    | 1.2(2)     | O(2)-C(11)-C(12)-C(13) | 52.9(3)    |
| C(8)-C(4)-C(5)-O(1)    | 179.0(2)   | O(2)-C(11)-C(12)-C(15) | -67.2(3)   |
| C(3)-C(4)-C(5)-C(6)    | -172.8(2)  | O(2)-C(11)-C(12)-C(14) | 170.9(2)   |
| C(8)-C(4)-C(5)-C(6)    | 5.0(4)     | C(11)-C(12)-C(13)-O(3) | -53.7(3)   |
| C(4)-C(5)-C(6)-C(7)    | -123.8(3)  | C(15)-C(12)-C(13)-O(3) | 66.6(3)    |
| O(1)-C(5)-C(6)-C(7)    | 62.5(3)    | C(14)-C(12)-C(13)-O(3) | -170.9(2)  |
| C(5)-C(4)-C(8)-C(8)#1  | 47.6(5)    | C(3)-C(2)-O(1)-C(5)    | -0.1(2)    |
| C(3)-C(4)-C(8)-C(8)#1  | -135.0(3)  | C(1)-C(2)-O(1)-C(5)    | -177.7(2)  |
| C(5)-C(4)-C(8)-C(9)    | -133.1(3)  | C(4)-C(5)-O(1)-C(2)    | -0.8(2)    |
| C(3)-C(4)-C(8)-C(9)    | 44.3(3)    | C(6)-C(5)-O(1)-C(2)    | 174.52(19) |
| C(8)#1-C(8)-C(9)-F(2)  | 116.7(3)   | O(3)-C(1)-O(2)-C(11)   | 60.7(2)    |
| C(4)-C(8)-C(9)-F(2)    | -62.8(3)   | C(2)-C(1)-O(2)-C(11)   | 179.97(18) |
| C(8)#1-C(8)-C(9)-F(1)  | -125.0(3)  | C(12)-C(11)-O(2)-C(1)  | -57.0(3)   |
| C(4)-C(8)-C(9)-F(1)    | 55.6(3)    | O(2)-C(1)-O(3)-C(13)   | -61.2(2)   |
| C(8)#1-C(8)-C(9)-C(10) | -4.0(3)    | C(2)-C(1)-O(3)-C(13)   | -178.6(2)  |
| C(4)-C(8)-C(9)-C(10)   | 176.60(18) | C(12)-C(13)-O(3)-C(1)  | 58.4(2)    |
| F(2)-C(9)-C(10)-F(3)   | -0.2(3)    |                        |            |

Symmetry transformations used to generate equivalent atoms: #1 -x,y,-z-1/2

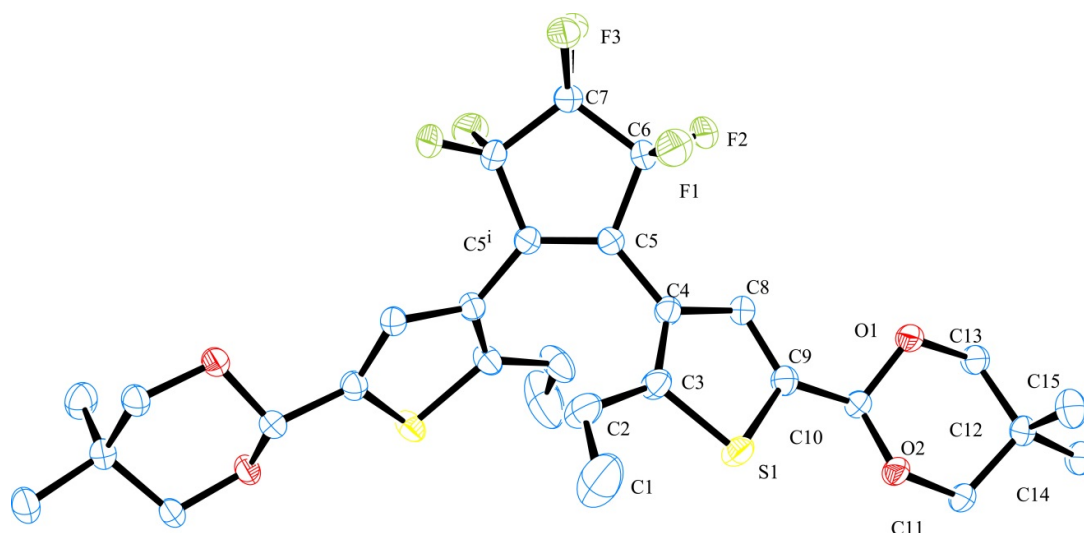

**Figure S2.** ORTEP of **C5F-T-Et-NPA** with ellipsoids drawn at the 50% level and hydrogen atoms omitted for clarity.

**Table S7.** Crystal data and structure refinement parameters for **C5F-T-Et-NPA**

| <b>C5F-T-Et-NPA (CCDC 1946677)</b> |                                                                                                  |
|------------------------------------|--------------------------------------------------------------------------------------------------|
| Empirical formula                  | C <sub>29</sub> H <sub>34</sub> F <sub>6</sub> O <sub>4</sub> S <sub>2</sub>                     |
| Formula weight                     | 624.68                                                                                           |
| Temperature                        | 100(2) K                                                                                         |
| Wavelength                         | 0.71073 Å                                                                                        |
| Crystal system                     | Orthorhombic                                                                                     |
| Space group                        | P b c n                                                                                          |
| Unit cell dimensions               | a = 25.3473(19) Å      α = 90°<br>b = 11.0250(8) Å      β = 90°<br>c = 10.6805(11) Å     γ = 90° |
| Volume                             | 2984.7(4) Å <sup>3</sup>                                                                         |
| Z                                  | 4                                                                                                |
| Density (calculated)               | 1.390 Mg/m <sup>3</sup>                                                                          |
| Absorption coefficient             | 0.25 mm <sup>-1</sup>                                                                            |
| F(000)                             | 1304                                                                                             |
| Crystal size                       | 0.480 x 0.433 x 0.390 mm <sup>3</sup>                                                            |
| Theta range for data collection    | 1.607 to 26.830°                                                                                 |
| Index ranges                       | -31 ≤ h ≤ 32, -13 ≤ k ≤ 13, -13 ≤ l ≤ 13                                                         |
| Reflections collected              | 41581                                                                                            |
| Independent reflections            | 3180 [R(int) = 0.0881]                                                                           |
| Completeness to theta = 25.242°    | 100.0 %                                                                                          |
| Absorption correction              | Integration                                                                                      |
| Max. and min. transmission         | 0.9345 and 0.8507                                                                                |
| Refinement method                  | Full-matrix least-squares on F <sup>2</sup>                                                      |
| Data / restraints / parameters     | 3180 / 0 / 217                                                                                   |
| Goodness-of-fit on F <sup>2</sup>  | 1.043                                                                                            |
| Final R indices [I > 2σ(I)]        | R <sub>1</sub> = 0.0414, wR <sub>2</sub> = 0.1106                                                |
| R indices (all data)               | R <sub>1</sub> = 0.0482, wR <sub>2</sub> = 0.1145                                                |
| Largest diff. peak and hole        | 1.091 and -0.464 e.Å <sup>-3</sup>                                                               |

**Table S8.** Atomic coordinates ( $\times 10^4$ ) and equivalent isotropic displacement parameters ( $\text{\AA}^2 \times 10^3$ ) for **C5F-T-Et-NPA**.

U(eq) is defined as one third of the trace of the orthogonalized  $U^{ij}$  tensor.

|       | x       | y       | z        | U(eq) |
|-------|---------|---------|----------|-------|
| C(1)  | 4340(1) | 8890(3) | 5104(3)  | 73(1) |
| C(2)  | 4609(1) | 8117(2) | 4176(2)  | 39(1) |
| C(3)  | 4327(1) | 7895(2) | 2963(2)  | 26(1) |
| C(4)  | 4380(1) | 6947(2) | 2136(2)  | 22(1) |
| C(5)  | 4745(1) | 5929(2) | 2313(2)  | 22(1) |
| C(6)  | 4552(1) | 4663(2) | 2107(2)  | 42(1) |
| C(7)  | 5000    | 3834(2) | 2500     | 24(1) |
| C(8)  | 4036(1) | 7052(2) | 1076(2)  | 22(1) |
| C(9)  | 3736(1) | 8070(2) | 1108(2)  | 23(1) |
| C(10) | 3364(1) | 8541(2) | 135(2)   | 23(1) |
| C(11) | 2690(1) | 9931(2) | -222(2)  | 25(1) |
| C(12) | 2363(1) | 8966(2) | -890(2)  | 25(1) |
| C(13) | 2748(1) | 8012(2) | -1376(2) | 26(1) |
| C(14) | 2080(1) | 9559(2) | -1995(2) | 33(1) |
| C(15) | 1964(1) | 8396(2) | 6(2)     | 35(1) |
| O(1)  | 3083(1) | 7565(1) | -384(1)  | 25(1) |
| O(2)  | 3030(1) | 9399(1) | 707(1)   | 25(1) |
| S(1)  | 3858(1) | 8908(1) | 2436(1)  | 27(1) |
| F(1)  | 4169(1) | 4422(2) | 3212(3)  | 38(1) |
| F(2)  | 4283(1) | 4394(2) | 1204(3)  | 37(1) |
| F(3)  | 5092(1) | 2842(3) | 1824(3)  | 35(1) |
| F(4)  | 4084(1) | 4409(2) | 2297(3)  | 37(1) |
| F(5)  | 4578(2) | 4513(2) | 652(3)   | 35(1) |
| F(6)  | 5196(1) | 3456(4) | 1371(3)  | 37(1) |

**Table S9.** Bond lengths [Å] and angles [°] for **C5F-T-Et-NPA**.

|                  |            |                    |            |             |            |
|------------------|------------|--------------------|------------|-------------|------------|
| C(1)-C(2)        | 1.475(3)   | C(6)-C(7)          | 1.517(2)   | C(9)-S(1)   | 1.7209(17) |
| C(2)-C(3)        | 1.500(2)   | C(6)-F(1)          | 1.551(4)   | C(10)-O(1)  | 1.404(2)   |
| C(3)-C(4)        | 1.376(2)   | C(6)-F(5)          | 1.564(4)   | C(10)-O(2)  | 1.408(2)   |
| C(3)-S(1)        | 1.7254(17) | C(7)-F(3)#1        | 1.331(3)   | C(11)-O(2)  | 1.4405(19) |
| C(4)-C(8)        | 1.434(2)   | C(7)-F(3)          | 1.331(3)   | C(11)-C(12) | 1.525(2)   |
| C(4)-C(5)        | 1.466(2)   | C(7)-F(6)          | 1.369(3)   | C(12)-C(13) | 1.525(2)   |
| C(5)-C(5)#1      | 1.355(3)   | C(7)-F(6)#1        | 1.369(3)   | C(12)-C(15) | 1.527(2)   |
| C(5)-C(6)        | 1.495(2)   | C(7)-C(6)#1        | 1.517(2)   | C(12)-C(14) | 1.528(2)   |
| C(6)-F(2)        | 1.217(3)   | C(8)-C(9)          | 1.355(2)   | C(13)-O(1)  | 1.445(2)   |
| C(6)-F(4)        | 1.234(3)   | C(9)-C(10)         | 1.496(2)   | F(3)-F(3)#1 | 1.516(7)   |
|                  |            |                    |            |             |            |
| C(1)-C(2)-C(3)   | 116.94(18) | F(6)#1-C(7)-C(6)   | 98.94(18)  |             |            |
| C(4)-C(3)-C(2)   | 129.16(16) | F(3)#1-C(7)-C(6)#1 | 118.40(14) |             |            |
| C(4)-C(3)-S(1)   | 110.48(13) | F(3)-C(7)-C(6)#1   | 120.97(16) |             |            |
| C(2)-C(3)-S(1)   | 120.36(13) | F(6)-C(7)-C(6)#1   | 98.94(18)  |             |            |
| C(3)-C(4)-C(8)   | 112.67(15) | F(6)#1-C(7)-C(6)#1 | 102.22(17) |             |            |
| C(3)-C(4)-C(5)   | 124.11(15) | C(6)-C(7)-C(6)#1   | 105.9(2)   |             |            |
| C(8)-C(4)-C(5)   | 123.23(15) | C(9)-C(8)-C(4)     | 112.88(15) |             |            |
| C(5)#1-C(5)-C(4) | 129.82(9)  | C(8)-C(9)-C(10)    | 128.55(15) |             |            |
| C(5)#1-C(5)-C(6) | 110.85(10) | C(8)-C(9)-S(1)     | 111.39(13) |             |            |
| C(4)-C(5)-C(6)   | 119.31(14) | C(10)-C(9)-S(1)    | 119.94(12) |             |            |
| F(2)-C(6)-C(5)   | 121.8(2)   | O(1)-C(10)-O(2)    | 112.41(13) |             |            |
| F(4)-C(6)-C(5)   | 120.1(2)   | O(1)-C(10)-C(9)    | 109.12(13) |             |            |
| F(2)-C(6)-C(7)   | 119.5(2)   | O(2)-C(10)-C(9)    | 108.09(13) |             |            |
| F(4)-C(6)-C(7)   | 122.4(2)   | O(2)-C(11)-C(12)   | 111.27(13) |             |            |
| C(5)-C(6)-C(7)   | 106.06(15) | C(13)-C(12)-C(11)  | 107.04(14) |             |            |
| F(2)-C(6)-F(1)   | 102.2(2)   | C(13)-C(12)-C(15)  | 110.69(15) |             |            |
| C(5)-C(6)-F(1)   | 104.63(19) | C(11)-C(12)-C(15)  | 110.67(15) |             |            |
| C(7)-C(6)-F(1)   | 98.86(18)  | C(13)-C(12)-C(14)  | 109.41(15) |             |            |
| F(4)-C(6)-F(5)   | 100.4(2)   | C(11)-C(12)-C(14)  | 108.48(14) |             |            |
| C(5)-C(6)-F(5)   | 103.37(19) | C(15)-C(12)-C(14)  | 110.45(15) |             |            |
| C(7)-C(6)-F(5)   | 100.30(17) | O(1)-C(13)-C(12)   | 111.22(14) |             |            |
| F(3)#1-C(7)-F(3) | 69.4(4)    | C(10)-O(1)-C(13)   | 108.99(12) |             |            |
| F(6)-C(7)-F(6)#1 | 144.5(4)   | C(10)-O(2)-C(11)   | 109.58(12) |             |            |
| F(3)#1-C(7)-C(6) | 120.96(16) | C(9)-S(1)-C(3)     | 92.57(8)   |             |            |
| F(3)-C(7)-C(6)   | 118.40(14) | C(7)-F(3)-F(3)#1   | 55.29(19)  |             |            |
| F(6)-C(7)-C(6)   | 102.22(17) |                    |            |             |            |

Symmetry transformations used to generate equivalent atoms: #1 -x+1,y,-z+1/2



**Table S10.** Anisotropic displacement parameters ( $\text{\AA}^2 \times 10^3$ ) for **C5F-T-Et-NPA**.The anisotropic displacement factor exponent takes the form:  $-2\pi^2 [ h^2 a^*2U^{11} + \dots + 2 h k a^* b^* U^{12} ]$ 

|       | U <sup>11</sup> | U <sup>22</sup> | U <sup>33</sup> | U <sup>23</sup> | U <sup>13</sup> | U <sup>12</sup> |
|-------|-----------------|-----------------|-----------------|-----------------|-----------------|-----------------|
| C(1)  | 76(2)           | 93(2)           | 50(2)           | -34(2)          | -27(1)          | 42(2)           |
| C(2)  | 52(1)           | 37(1)           | 27(1)           | -9(1)           | -15(1)          | 18(1)           |
| C(3)  | 29(1)           | 26(1)           | 24(1)           | 0(1)            | -4(1)           | 7(1)            |
| C(4)  | 21(1)           | 23(1)           | 22(1)           | 1(1)            | -2(1)           | 1(1)            |
| C(5)  | 22(1)           | 21(1)           | 22(1)           | -1(1)           | -2(1)           | 0(1)            |
| C(6)  | 24(1)           | 24(1)           | 78(2)           | -4(1)           | -19(1)          | -1(1)           |
| C(7)  | 25(1)           | 21(1)           | 26(1)           | 0               | -3(1)           | 0               |
| C(8)  | 19(1)           | 23(1)           | 22(1)           | 0(1)            | -1(1)           | 0(1)            |
| C(9)  | 22(1)           | 25(1)           | 21(1)           | 1(1)            | -1(1)           | 0(1)            |
| C(10) | 22(1)           | 21(1)           | 25(1)           | 1(1)            | -2(1)           | 2(1)            |
| C(11) | 24(1)           | 23(1)           | 28(1)           | 2(1)            | -7(1)           | 4(1)            |
| C(12) | 22(1)           | 26(1)           | 26(1)           | 1(1)            | -5(1)           | 1(1)            |
| C(13) | 28(1)           | 26(1)           | 24(1)           | -1(1)           | -7(1)           | 2(1)            |
| C(14) | 33(1)           | 34(1)           | 32(1)           | 0(1)            | -12(1)          | 4(1)            |
| C(15) | 26(1)           | 42(1)           | 37(1)           | 2(1)            | 1(1)            | -5(1)           |
| O(1)  | 26(1)           | 22(1)           | 26(1)           | -1(1)           | -6(1)           | 2(1)            |
| O(2)  | 25(1)           | 24(1)           | 26(1)           | -2(1)           | -7(1)           | 6(1)            |
| S(1)  | 32(1)           | 26(1)           | 24(1)           | -2(1)           | -5(1)           | 10(1)           |
| F(1)  | 24(1)           | 34(1)           | 55(2)           | 8(1)            | 12(1)           | -3(1)           |
| F(2)  | 37(2)           | 28(1)           | 44(2)           | -4(1)           | -24(2)          | -1(1)           |
| F(3)  | 36(1)           | 23(1)           | 47(2)           | -12(1)          | -12(1)          | 6(1)            |
| F(4)  | 18(1)           | 30(1)           | 64(3)           | 2(1)            | -2(1)           | -3(1)           |
| F(5)  | 51(2)           | 28(1)           | 26(1)           | -6(1)           | -16(1)          | 6(1)            |
| F(6)  | 35(1)           | 44(2)           | 32(1)           | -15(1)          | -3(1)           | 6(1)            |

**Table S11.** Torsion angles [°] for **C5F-T-Et-NPA**.

|                       |             |                         |             |
|-----------------------|-------------|-------------------------|-------------|
| C(1)-C(2)-C(3)-C(4)   | -155.8(3)   | F(4)-C(6)-C(7)-F(6)#1   | -39.2(4)    |
| C(1)-C(2)-C(3)-S(1)   | 24.0(3)     | C(5)-C(6)-C(7)-F(6)#1   | 104.1(2)    |
| C(2)-C(3)-C(4)-C(8)   | 179.58(19)  | F(1)-C(6)-C(7)-F(6)#1   | -4.1(3)     |
| S(1)-C(3)-C(4)-C(8)   | -0.20(19)   | F(5)-C(6)-C(7)-F(6)#1   | -148.7(3)   |
| C(2)-C(3)-C(4)-C(5)   | 0.1(3)      | F(2)-C(6)-C(7)-C(6)#1   | 140.9(3)    |
| S(1)-C(3)-C(4)-C(5)   | -179.68(13) | F(4)-C(6)-C(7)-C(6)#1   | -144.7(3)   |
| C(3)-C(4)-C(5)-C(5)#1 | -44.3(3)    | C(5)-C(6)-C(7)-C(6)#1   | -1.47(9)    |
| C(8)-C(4)-C(5)-C(5)#1 | 136.2(2)    | F(1)-C(6)-C(7)-C(6)#1   | -109.58(18) |
| C(3)-C(4)-C(5)-C(6)   | 133.5(2)    | F(5)-C(6)-C(7)-C(6)#1   | 105.80(19)  |
| C(8)-C(4)-C(5)-C(6)   | -45.9(3)    | C(3)-C(4)-C(8)-C(9)     | 0.8(2)      |
| C(5)#1-C(5)-C(6)-F(2) | -137.0(3)   | C(5)-C(4)-C(8)-C(9)     | -179.74(15) |
| C(4)-C(5)-C(6)-F(2)   | 44.7(4)     | C(4)-C(8)-C(9)-C(10)    | 174.86(16)  |
| C(5)#1-C(5)-C(6)-F(4) | 148.6(3)    | C(4)-C(8)-C(9)-S(1)     | -0.99(18)   |
| C(4)-C(5)-C(6)-F(4)   | -29.7(4)    | C(8)-C(9)-C(10)-O(1)    | 40.2(2)     |
| C(5)#1-C(5)-C(6)-C(7) | 4.3(3)      | S(1)-C(9)-C(10)-O(1)    | -144.22(12) |
| C(4)-C(5)-C(6)-C(7)   | -173.97(14) | C(8)-C(9)-C(10)-O(2)    | 162.76(16)  |
| C(5)#1-C(5)-C(6)-F(1) | 108.2(2)    | S(1)-C(9)-C(10)-O(2)    | -21.69(18)  |
| C(4)-C(5)-C(6)-F(1)   | -70.0(2)    | O(2)-C(11)-C(12)-C(13)  | -52.98(18)  |
| C(5)#1-C(5)-C(6)-F(5) | -100.8(2)   | O(2)-C(11)-C(12)-C(15)  | 67.73(18)   |
| C(4)-C(5)-C(6)-F(5)   | 81.0(2)     | O(2)-C(11)-C(12)-C(14)  | -170.95(14) |
| F(2)-C(6)-C(7)-F(3)#1 | -80.6(4)    | C(11)-C(12)-C(13)-O(1)  | 53.57(18)   |
| F(4)-C(6)-C(7)-F(3)#1 | -6.3(4)     | C(15)-C(12)-C(13)-O(1)  | -67.12(18)  |
| C(5)-C(6)-C(7)-F(3)#1 | 137.0(2)    | C(14)-C(12)-C(13)-O(1)  | 170.93(14)  |
| F(1)-C(6)-C(7)-F(3)#1 | 28.8(3)     | O(2)-C(10)-O(1)-C(13)   | 63.62(17)   |
| F(5)-C(6)-C(7)-F(3)#1 | -115.8(3)   | C(9)-C(10)-O(1)-C(13)   | -176.48(13) |
| F(2)-C(6)-C(7)-F(3)   | 1.2(3)      | C(12)-C(13)-O(1)-C(10)  | -58.88(17)  |
| F(4)-C(6)-C(7)-F(3)   | 75.6(3)     | O(1)-C(10)-O(2)-C(11)   | -63.32(17)  |
| C(5)-C(6)-C(7)-F(3)   | -141.2(3)   | C(9)-C(10)-O(2)-C(11)   | 176.18(13)  |
| F(1)-C(6)-C(7)-F(3)   | 110.7(2)    | C(12)-C(11)-O(2)-C(10)  | 57.83(18)   |
| F(5)-C(6)-C(7)-F(3)   | -33.9(3)    | C(8)-C(9)-S(1)-C(3)     | 0.75(14)    |
| F(2)-C(6)-C(7)-F(6)   | 37.8(3)     | C(10)-C(9)-S(1)-C(3)    | -175.51(14) |
| F(4)-C(6)-C(7)-F(6)   | 112.1(3)    | C(4)-C(3)-S(1)-C(9)     | -0.30(14)   |
| C(5)-C(6)-C(7)-F(6)   | -104.6(2)   | C(2)-C(3)-S(1)-C(9)     | 179.89(17)  |
| F(1)-C(6)-C(7)-F(6)   | 147.3(2)    | F(6)-C(7)-F(3)-F(3)#1   | 172.9(3)    |
| F(5)-C(6)-C(7)-F(6)   | 2.7(2)      | F(6)#1-C(7)-F(3)-F(3)#1 | -4.5(2)     |
| F(2)-C(6)-C(7)-F(6)#1 | -113.5(3)   | C(6)-C(7)-F(3)-F(3)#1   | -114.95(19) |
|                       |             | C(6)#1-C(7)-F(3)-F(3)#1 | 111.5(2)    |

Symmetry transformations used to generate equivalent atoms: #1 -x+1,y,-z+1/2

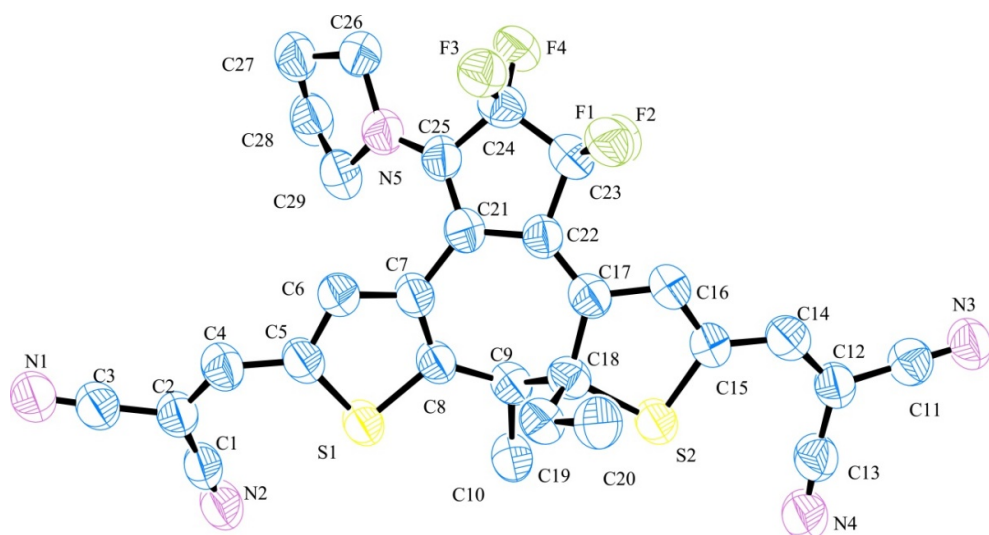

**Figure S3.** ORTEP of 7-T-Et-MN-pyrr (**8f**) with ellipsoids drawn at the 50% level and hydrogen atoms omitted for clarity.

**Table S12.** Crystal data and structure refinement parameters for 7-T-Et-MN-pyrr (**8f**)

| 7-T-Et-MN-pyrr ( <b>8f</b> ) (CCDC 1037924) |                                                                                                                                           |
|---------------------------------------------|-------------------------------------------------------------------------------------------------------------------------------------------|
| Empirical formula                           | C <sub>29</sub> H <sub>21</sub> F <sub>4</sub> N <sub>5</sub> S <sub>2</sub>                                                              |
| Formula weight                              | 579.63                                                                                                                                    |
| Temperature                                 | 100(2) K                                                                                                                                  |
| Wavelength                                  | 0.71073 Å                                                                                                                                 |
| Crystal system                              | Triclinic                                                                                                                                 |
| Space group                                 | <i>P</i> -1                                                                                                                               |
| Unit cell dimensions                        | <i>a</i> = 6.3781(16) Å $\alpha$ = 92.61(2)°<br><i>b</i> = 13.826(4) Å $\beta$ = 91.07(2)°<br><i>c</i> = 15.124(4) Å $\gamma$ = 96.54(2)° |
| Volume                                      | 1323.2(6) Å <sup>3</sup>                                                                                                                  |
| <i>Z</i>                                    | 2                                                                                                                                         |
| Density (calculated)                        | 1.455 Mg/m <sup>3</sup>                                                                                                                   |
| Absorption coefficient                      | 0.259 mm <sup>-1</sup>                                                                                                                    |
| F(000)                                      | 596                                                                                                                                       |
| Crystal size                                | 0.400 x 0.253 x 0.150 mm <sup>3</sup>                                                                                                     |
| Theta range for data collection             | 1.484 to 26.290°.                                                                                                                         |
| Index ranges                                | -7 ≤ <i>h</i> ≤ 7, -16 ≤ <i>k</i> ≤ 17, -18 ≤ <i>l</i> ≤ 18                                                                               |
| Reflections collected                       | 14778                                                                                                                                     |
| Independent reflections                     | 5138 [R(int) = 0.1195]                                                                                                                    |
| Completeness to theta = 25.242°             | 99.2 %                                                                                                                                    |
| Absorption correction                       | Integration                                                                                                                               |
| Max. and min. transmission                  | 0.9585 and 0.6354                                                                                                                         |
| Refinement method                           | Full-matrix least-squares on F <sup>2</sup>                                                                                               |
| Data / restraints / parameters              | 5138 / 0 / 363                                                                                                                            |
| Goodness-of-fit on F <sup>2</sup>           | 0.846                                                                                                                                     |
| Final R indices [I > 2σ(I)]                 | <i>R</i> <sub>1</sub> = 0.0559, <i>wR</i> <sub>2</sub> = 0.1127                                                                           |
| R indices (all data)                        | <i>R</i> <sub>1</sub> = 0.1733, <i>wR</i> <sub>2</sub> = 0.1487                                                                           |
| Largest diff. peak and hole                 | 0.264 and -0.220 e.Å <sup>-3</sup>                                                                                                        |

**Table S13.** Atomic coordinates ( $\times 10^4$ ) and equivalent isotropic displacement parameters ( $\text{\AA}^2 \times 10^3$ ) for 7-T-Et-MN-pyrr (**8f**).

U(eq) is defined as one third of the trace of the orthogonalized  $U_{ij}$  tensor.

|       | x         | y        | z        | U(eq)  |
|-------|-----------|----------|----------|--------|
| C(1)  | 10727(10) | 8912(4)  | 4063(3)  | 74(1)  |
| C(2)  | 8592(8)   | 9117(3)  | 4194(3)  | 68(1)  |
| C(3)  | 7900(8)   | 9889(4)  | 3697(3)  | 77(1)  |
| C(4)  | 7301(8)   | 8706(3)  | 4816(3)  | 71(1)  |
| C(5)  | 7730(8)   | 7986(3)  | 5449(3)  | 71(1)  |
| C(6)  | 6568(7)   | 7889(3)  | 6210(3)  | 65(1)  |
| C(7)  | 7418(8)   | 7269(3)  | 6808(3)  | 65(1)  |
| C(8)  | 9093(7)   | 6840(3)  | 6464(3)  | 64(1)  |
| C(9)  | 10221(7)  | 6074(3)  | 6875(3)  | 66(1)  |
| C(18) | 8664(7)   | 5147(3)  | 7047(3)  | 63(1)  |
| C(17) | 7267(7)   | 5315(3)  | 7848(3)  | 66(1)  |
| C(16) | 7240(8)   | 4521(3)  | 8431(3)  | 69(1)  |
| C(15) | 8682(8)   | 3891(3)  | 8286(3)  | 66(1)  |
| C(14) | 9020(8)   | 3174(3)  | 8904(3)  | 70(1)  |
| C(12) | 10494(8)  | 2545(3)  | 8925(3)  | 71(1)  |
| C(13) | 12027(9)  | 2433(4)  | 8253(3)  | 79(1)  |
| C(11) | 10558(8)  | 1920(4)  | 9675(3)  | 73(1)  |
| C(22) | 6393(7)   | 6140(3)  | 8071(3)  | 62(1)  |
| C(21) | 6502(7)   | 7072(3)  | 7685(3)  | 63(1)  |
| C(25) | 5696(8)   | 7775(4)  | 8218(3)  | 66(1)  |
| C(24) | 4441(8)   | 7259(4)  | 8936(3)  | 70(1)  |
| C(23) | 5137(8)   | 6224(4)  | 8910(3)  | 68(1)  |
| C(29) | 7715(8)   | 9305(3)  | 7773(3)  | 79(1)  |
| C(28) | 7975(10)  | 10259(4) | 8285(3)  | 92(2)  |
| C(27) | 5751(11)  | 10410(4) | 8504(3)  | 95(2)  |
| C(26) | 4751(9)   | 9402(3)  | 8742(3)  | 86(2)  |
| C(10) | 12158(7)  | 5840(3)  | 6343(3)  | 74(1)  |
| C(19) | 7359(7)   | 4796(3)  | 6203(3)  | 67(1)  |
| C(20) | 5815(8)   | 3878(3)  | 6274(3)  | 76(1)  |
| F(4)  | 4709(4)   | 7689(2)  | 9756(2)  | 76(1)  |
| F(3)  | 2322(5)   | 7210(2)  | 8755(2)  | 79(1)  |
| F(1)  | 3451(5)   | 5542(2)  | 8955(2)  | 79(1)  |
| F(2)  | 6342(4)   | 6144(2)  | 9654(2)  | 80(1)  |
| N(2)  | 12441(8)  | 8781(3)  | 3962(3)  | 90(1)  |
| N(1)  | 7389(7)   | 10540(3) | 3328(3)  | 86(1)  |
| N(4)  | 13220(8)  | 2293(3)  | 7729(3)  | 105(2) |
| N(3)  | 10605(7)  | 1427(3)  | 10260(3) | 85(1)  |
| N(5)  | 5920(6)   | 8739(3)  | 8201(2)  | 71(1)  |
| S(1)  | 9736(2)   | 7262(1)  | 5430(1)  | 70(1)  |
| S(2)  | 10234(2)  | 4152(1)  | 7361(1)  | 72(1)  |

**Table S14.** Bond lengths [Å] and angles [°] for 7-T-Et-MN-pyrr (**8f**)

|                   |          |                   |          |             |          |
|-------------------|----------|-------------------|----------|-------------|----------|
| C(1)-N(2)         | 1.140(6) | C(18)-C(19)       | 1.539(6) | C(21)-C(25) | 1.384(6) |
| C(1)-C(2)         | 1.437(7) | C(18)-C(17)       | 1.541(6) | C(25)-N(5)  | 1.325(5) |
| C(2)-C(4)         | 1.362(6) | C(18)-S(2)        | 1.864(4) | C(25)-C(24) | 1.517(6) |
| C(2)-C(3)         | 1.438(7) | C(17)-C(22)       | 1.358(6) | C(24)-F(4)  | 1.349(5) |
| C(3)-N(1)         | 1.155(5) | C(17)-C(16)       | 1.438(6) | C(24)-F(3)  | 1.367(5) |
| C(4)-C(5)         | 1.457(6) | C(16)-C(15)       | 1.351(6) | C(24)-C(23) | 1.545(6) |
| C(5)-C(6)         | 1.384(5) | C(15)-C(14)       | 1.425(6) | C(23)-F(1)  | 1.352(5) |
| C(5)-S(1)         | 1.712(5) | C(15)-S(2)        | 1.756(4) | C(23)-F(2)  | 1.367(5) |
| C(6)-C(7)         | 1.416(6) | C(14)-C(12)       | 1.352(6) | C(29)-N(5)  | 1.487(6) |
| C(7)-C(8)         | 1.379(6) | C(12)-C(13)       | 1.439(7) | C(29)-C(28) | 1.489(6) |
| C(7)-C(21)        | 1.483(6) | C(12)-C(11)       | 1.459(6) | C(28)-C(27) | 1.498(7) |
| C(8)-C(9)         | 1.496(6) | C(13)-N(4)        | 1.135(5) | C(27)-C(26) | 1.527(7) |
| C(8)-S(1)         | 1.734(4) | C(11)-N(3)        | 1.143(5) | C(26)-N(5)  | 1.476(5) |
| C(9)-C(10)        | 1.544(6) | C(22)-C(21)       | 1.433(6) | C(19)-C(20) | 1.525(6) |
| C(9)-C(18)        | 1.565(6) | C(22)-C(23)       | 1.521(6) |             |          |
|                   |          |                   |          |             |          |
| N(2)-C(1)-C(2)    | 177.8(6) | C(15)-C(16)-C(17) | 116.5(4) |             |          |
| C(4)-C(2)-C(1)    | 124.4(4) | C(16)-C(15)-C(14) | 121.1(4) |             |          |
| C(4)-C(2)-C(3)    | 118.9(4) | C(16)-C(15)-S(2)  | 113.3(3) |             |          |
| C(1)-C(2)-C(3)    | 116.3(4) | C(14)-C(15)-S(2)  | 125.2(4) |             |          |
| N(1)-C(3)-C(2)    | 176.8(6) | C(12)-C(14)-C(15) | 130.2(4) |             |          |
| C(2)-C(4)-C(5)    | 128.7(4) | C(14)-C(12)-C(13) | 124.8(4) |             |          |
| C(6)-C(5)-C(4)    | 120.3(4) | C(14)-C(12)-C(11) | 118.8(4) |             |          |
| C(6)-C(5)-S(1)    | 112.0(3) | C(13)-C(12)-C(11) | 116.4(4) |             |          |
| C(4)-C(5)-S(1)    | 127.4(3) | N(4)-C(13)-C(12)  | 176.3(5) |             |          |
| C(5)-C(6)-C(7)    | 112.2(4) | N(3)-C(11)-C(12)  | 179.8(6) |             |          |
| C(8)-C(7)-C(6)    | 112.6(4) | C(17)-C(22)-C(21) | 132.4(4) |             |          |
| C(8)-C(7)-C(21)   | 124.6(4) | C(17)-C(22)-C(23) | 121.2(4) |             |          |
| C(6)-C(7)-C(21)   | 122.7(4) | C(21)-C(22)-C(23) | 106.3(4) |             |          |
| C(7)-C(8)-C(9)    | 126.9(4) | C(25)-C(21)-C(22) | 113.4(4) |             |          |
| C(7)-C(8)-S(1)    | 111.3(3) | C(25)-C(21)-C(7)  | 123.2(4) |             |          |
| C(9)-C(8)-S(1)    | 121.8(3) | C(22)-C(21)-C(7)  | 123.4(4) |             |          |
| C(8)-C(9)-C(10)   | 112.2(3) | N(5)-C(25)-C(21)  | 131.4(4) |             |          |
| C(8)-C(9)-C(18)   | 111.2(4) | N(5)-C(25)-C(24)  | 120.8(4) |             |          |
| C(10)-C(9)-C(18)  | 112.9(4) | C(21)-C(25)-C(24) | 107.8(4) |             |          |
| C(19)-C(18)-C(17) | 112.5(4) | F(4)-C(24)-F(3)   | 104.9(4) |             |          |
| C(19)-C(18)-C(9)  | 110.7(3) | F(4)-C(24)-C(25)  | 115.5(4) |             |          |
| C(17)-C(18)-C(9)  | 111.7(3) | F(3)-C(24)-C(25)  | 110.8(4) |             |          |
| C(19)-C(18)-S(2)  | 108.0(3) | F(4)-C(24)-C(23)  | 111.2(4) |             |          |
| C(17)-C(18)-S(2)  | 105.1(3) | F(3)-C(24)-C(23)  | 110.1(4) |             |          |
| C(9)-C(18)-S(2)   | 108.6(3) | C(25)-C(24)-C(23) | 104.5(4) |             |          |
| C(22)-C(17)-C(16) | 121.9(4) | F(1)-C(23)-F(2)   | 105.9(4) |             |          |
| C(22)-C(17)-C(18) | 126.8(4) | F(1)-C(23)-C(22)  | 114.4(4) |             |          |
| C(16)-C(17)-C(18) | 110.7(4) | F(2)-C(23)-C(22)  | 112.0(4) |             |          |

|                   |          |                   |          |
|-------------------|----------|-------------------|----------|
| F(1)-C(23)-C(24)  | 110.9(4) | C(20)-C(19)-C(18) | 116.1(4) |
| F(2)-C(23)-C(24)  | 107.9(4) | C(25)-N(5)-C(26)  | 125.7(4) |
| C(22)-C(23)-C(24) | 105.7(4) | C(25)-N(5)-C(29)  | 123.2(4) |
| N(5)-C(29)-C(28)  | 103.9(4) | C(26)-N(5)-C(29)  | 109.9(4) |
| C(29)-C(28)-C(27) | 102.9(5) | C(5)-S(1)-C(8)    | 91.6(2)  |
| C(28)-C(27)-C(26) | 104.0(4) | C(15)-S(2)-C(18)  | 92.3(2)  |
| N(5)-C(26)-C(27)  | 103.0(4) |                   |          |

---

Symmetry transformations used to generate equivalent atoms:

**Table S15.** Anisotropic displacement parameters ( $\text{\AA}^2 \times 10^3$ ) for 7-T-Et-MN-pyrr (**8f**).

The anisotropic displacement factor exponent takes the form:  $-2\pi^2 [ h^2 a^2 U^{11} + \dots + 2 h k a^* b^* U^{12} ]$

|       | U <sup>11</sup> | U <sup>22</sup> | U <sup>33</sup> | U <sup>23</sup> | U <sup>13</sup> | U <sup>12</sup> |
|-------|-----------------|-----------------|-----------------|-----------------|-----------------|-----------------|
| C(1)  | 81(4)           | 77(3)           | 66(3)           | 24(2)           | 8(3)            | 16(3)           |
| C(2)  | 68(4)           | 75(3)           | 63(3)           | 14(2)           | 2(3)            | 11(3)           |
| C(3)  | 70(4)           | 93(4)           | 70(3)           | 19(3)           | 6(3)            | 15(3)           |
| C(4)  | 68(3)           | 83(3)           | 64(3)           | 16(2)           | -2(2)           | 10(3)           |
| C(5)  | 78(4)           | 76(3)           | 59(3)           | 14(2)           | 6(3)            | 8(3)            |
| C(6)  | 67(3)           | 66(3)           | 63(3)           | 9(2)            | 6(2)            | 9(2)            |
| C(7)  | 68(3)           | 68(3)           | 60(3)           | 16(2)           | 5(2)            | 9(3)            |
| C(8)  | 65(3)           | 72(3)           | 55(2)           | 12(2)           | 3(2)            | 10(3)           |
| C(9)  | 64(3)           | 75(3)           | 58(2)           | 10(2)           | 3(2)            | 8(3)            |
| C(18) | 62(3)           | 65(3)           | 60(3)           | 3(2)            | 4(2)            | 0(2)            |
| C(17) | 66(3)           | 73(3)           | 59(3)           | 9(2)            | 2(2)            | 8(3)            |
| C(16) | 78(4)           | 70(3)           | 59(3)           | 14(2)           | 10(2)           | 7(3)            |
| C(15) | 72(3)           | 65(3)           | 62(3)           | 12(2)           | 6(2)            | 7(3)            |
| C(14) | 75(4)           | 70(3)           | 62(3)           | 3(2)            | 4(2)            | -1(3)           |
| C(12) | 76(4)           | 71(3)           | 69(3)           | 16(2)           | 6(3)            | 13(3)           |
| C(13) | 76(4)           | 83(4)           | 82(3)           | 19(3)           | 8(3)            | 20(3)           |
| C(11) | 67(3)           | 79(3)           | 74(3)           | 10(3)           | -2(3)           | 12(3)           |
| C(22) | 61(3)           | 64(3)           | 61(3)           | 11(2)           | 2(2)            | 10(2)           |
| C(21) | 65(3)           | 66(3)           | 59(3)           | 8(2)            | -2(2)           | 7(2)            |
| C(25) | 76(3)           | 62(3)           | 62(3)           | 10(2)           | -2(2)           | 11(3)           |
| C(24) | 62(4)           | 85(4)           | 61(3)           | 2(3)            | 1(2)            | 9(3)            |
| C(23) | 67(4)           | 80(4)           | 58(3)           | 11(2)           | 6(3)            | 3(3)            |
| C(29) | 92(4)           | 76(3)           | 67(3)           | 15(3)           | -2(3)           | 1(3)            |
| C(28) | 128(6)          | 76(4)           | 70(3)           | 9(3)            | -10(3)          | 4(3)            |
| C(27) | 152(6)          | 78(4)           | 59(3)           | 9(3)            | 0(3)            | 31(4)           |
| C(26) | 122(5)          | 74(3)           | 68(3)           | 8(3)            | 10(3)           | 34(3)           |
| C(10) | 67(3)           | 79(3)           | 77(3)           | 21(2)           | 2(3)            | 8(3)            |
| C(19) | 69(3)           | 72(3)           | 58(3)           | 5(2)            | 0(2)            | 3(3)            |
| C(20) | 73(4)           | 78(3)           | 76(3)           | 7(2)            | -4(3)           | 8(3)            |
| F(4)  | 87(2)           | 86(2)           | 54(1)           | 5(1)            | 6(1)            | 5(2)            |
| F(3)  | 76(2)           | 86(2)           | 78(2)           | 10(1)           | 8(2)            | 14(2)           |
| F(1)  | 77(2)           | 80(2)           | 78(2)           | 13(1)           | 17(1)           | 0(2)            |
| F(2)  | 93(2)           | 88(2)           | 60(2)           | 15(1)           | -1(1)           | 15(2)           |
| N(2)  | 86(4)           | 110(3)          | 82(3)           | 35(2)           | 16(3)           | 23(3)           |
| N(1)  | 88(3)           | 98(3)           | 77(3)           | 20(2)           | 5(2)            | 19(3)           |
| N(4)  | 110(4)          | 106(4)          | 111(3)          | 38(3)           | 39(3)           | 43(3)           |
| N(3)  | 94(4)           | 87(3)           | 77(3)           | 24(2)           | 3(2)            | 16(3)           |
| N(5)  | 82(3)           | 69(3)           | 62(2)           | 7(2)            | -2(2)           | 13(2)           |
| S(1)  | 71(1)           | 79(1)           | 62(1)           | 18(1)           | 7(1)            | 10(1)           |
| S(2)  | 74(1)           | 78(1)           | 65(1)           | 16(1)           | 8(1)            | 12(1)           |

**Table S16.** Torsion angles [°] for 7-T-Et-MN-pyrr (**8f**).

|                         |           |                         |           |
|-------------------------|-----------|-------------------------|-----------|
| C(1)-C(2)-C(4)-C(5)     | -1.5(8)   | C(6)-C(7)-C(21)-C(25)   | -38.3(7)  |
| C(3)-C(2)-C(4)-C(5)     | -173.9(5) | C(8)-C(7)-C(21)-C(22)   | -33.7(7)  |
| C(2)-C(4)-C(5)-C(6)     | 158.2(5)  | C(6)-C(7)-C(21)-C(22)   | 142.7(5)  |
| C(2)-C(4)-C(5)-S(1)     | -15.6(8)  | C(22)-C(21)-C(25)-N(5)  | 162.9(5)  |
| C(4)-C(5)-C(6)-C(7)     | -170.6(4) | C(7)-C(21)-C(25)-N(5)   | -16.2(8)  |
| S(1)-C(5)-C(6)-C(7)     | 4.2(5)    | C(22)-C(21)-C(25)-C(24) | -14.5(5)  |
| C(5)-C(6)-C(7)-C(8)     | -5.3(6)   | C(7)-C(21)-C(25)-C(24)  | 166.4(4)  |
| C(5)-C(6)-C(7)-C(21)    | 178.0(4)  | N(5)-C(25)-C(24)-F(4)   | -39.9(6)  |
| C(6)-C(7)-C(8)-C(9)     | -173.5(4) | C(21)-C(25)-C(24)-F(4)  | 137.9(4)  |
| C(21)-C(7)-C(8)-C(9)    | 3.2(8)    | N(5)-C(25)-C(24)-F(3)   | 79.1(5)   |
| C(6)-C(7)-C(8)-S(1)     | 4.0(5)    | C(21)-C(25)-C(24)-F(3)  | -103.1(4) |
| C(21)-C(7)-C(8)-S(1)    | -179.3(4) | N(5)-C(25)-C(24)-C(23)  | -162.4(4) |
| C(7)-C(8)-C(9)-C(10)    | -174.4(4) | C(21)-C(25)-C(24)-C(23) | 15.4(5)   |
| S(1)-C(8)-C(9)-C(10)    | 8.4(6)    | C(17)-C(22)-C(23)-F(1)  | -58.5(6)  |
| C(7)-C(8)-C(9)-C(18)    | 58.0(6)   | C(21)-C(22)-C(23)-F(1)  | 125.4(4)  |
| S(1)-C(8)-C(9)-C(18)    | -119.2(4) | C(17)-C(22)-C(23)-F(2)  | 62.0(6)   |
| C(8)-C(9)-C(18)-C(19)   | 51.4(4)   | C(21)-C(22)-C(23)-F(2)  | -114.1(4) |
| C(10)-C(9)-C(18)-C(19)  | -75.8(4)  | C(17)-C(22)-C(23)-C(24) | 179.2(4)  |
| C(8)-C(9)-C(18)-C(17)   | -74.8(4)  | C(21)-C(22)-C(23)-C(24) | 3.1(5)    |
| C(10)-C(9)-C(18)-C(17)  | 158.0(4)  | F(4)-C(24)-C(23)-F(1)   | 99.3(4)   |
| C(8)-C(9)-C(18)-S(2)    | 169.8(3)  | F(3)-C(24)-C(23)-F(1)   | -16.5(5)  |
| C(10)-C(9)-C(18)-S(2)   | 42.5(4)   | C(25)-C(24)-C(23)-F(1)  | -135.5(4) |
| C(19)-C(18)-C(17)-C(22) | -86.2(5)  | F(4)-C(24)-C(23)-F(2)   | -16.3(5)  |
| C(9)-C(18)-C(17)-C(22)  | 38.9(6)   | F(3)-C(24)-C(23)-F(2)   | -132.0(4) |
| S(2)-C(18)-C(17)-C(22)  | 156.6(4)  | C(25)-C(24)-C(23)-F(2)  | 109.0(4)  |
| C(19)-C(18)-C(17)-C(16) | 102.6(4)  | F(4)-C(24)-C(23)-C(22)  | -136.3(4) |
| C(9)-C(18)-C(17)-C(16)  | -132.3(4) | F(3)-C(24)-C(23)-C(22)  | 108.0(4)  |
| S(2)-C(18)-C(17)-C(16)  | -14.6(4)  | C(25)-C(24)-C(23)-C(22) | -11.0(5)  |
| C(22)-C(17)-C(16)-C(15) | -159.6(5) | N(5)-C(29)-C(28)-C(27)  | -35.1(5)  |
| C(18)-C(17)-C(16)-C(15) | 12.1(6)   | C(29)-C(28)-C(27)-C(26) | 40.7(5)   |
| C(17)-C(16)-C(15)-C(14) | 169.9(4)  | C(28)-C(27)-C(26)-N(5)  | -29.9(5)  |
| C(17)-C(16)-C(15)-S(2)  | -2.9(6)   | C(17)-C(18)-C(19)-C(20) | -55.9(5)  |
| C(16)-C(15)-C(14)-C(12) | -173.2(5) | C(9)-C(18)-C(19)-C(20)  | 178.4(4)  |
| S(2)-C(15)-C(14)-C(12)  | -1.3(8)   | S(2)-C(18)-C(19)-C(20)  | 59.6(4)   |
| C(15)-C(14)-C(12)-C(13) | -4.1(9)   | C(21)-C(25)-N(5)-C(26)  | 171.8(5)  |
| C(15)-C(14)-C(12)-C(11) | 176.3(5)  | C(24)-C(25)-N(5)-C(26)  | -11.0(7)  |
| C(16)-C(17)-C(22)-C(21) | 168.5(5)  | C(21)-C(25)-N(5)-C(29)  | -21.9(7)  |
| C(18)-C(17)-C(22)-C(21) | -1.8(8)   | C(24)-C(25)-N(5)-C(29)  | 155.2(4)  |
| C(16)-C(17)-C(22)-C(23) | -6.5(7)   | C(27)-C(26)-N(5)-C(25)  | 175.9(4)  |
| C(18)-C(17)-C(22)-C(23) | -176.8(4) | C(27)-C(26)-N(5)-C(29)  | 8.1(5)    |
| C(17)-C(22)-C(21)-C(25) | -168.4(5) | C(28)-C(29)-N(5)-C(25)  | -151.4(4) |
| C(23)-C(22)-C(21)-C(25) | 7.1(5)    | C(28)-C(29)-N(5)-C(26)  | 16.8(5)   |
| C(17)-C(22)-C(21)-C(7)  | 10.7(8)   | C(6)-C(5)-S(1)-C(8)     | -1.6(4)   |
| C(23)-C(22)-C(21)-C(7)  | -173.8(4) | C(4)-C(5)-S(1)-C(8)     | 172.7(5)  |
| C(8)-C(7)-C(21)-C(25)   | 145.3(5)  | C(7)-C(8)-S(1)-C(5)     | -1.4(4)   |



|                        |           |                        |           |
|------------------------|-----------|------------------------|-----------|
| C(9)-C(8)-S(1)-C(5)    | 176.2(4)  | C(19)-C(18)-S(2)-C(15) | -109.0(3) |
| C(16)-C(15)-S(2)-C(18) | -5.5(4)   | C(17)-C(18)-S(2)-C(15) | 11.3(3)   |
| C(14)-C(15)-S(2)-C(18) | -178.0(4) | C(9)-C(18)-S(2)-C(15)  | 131.0(3)  |

---

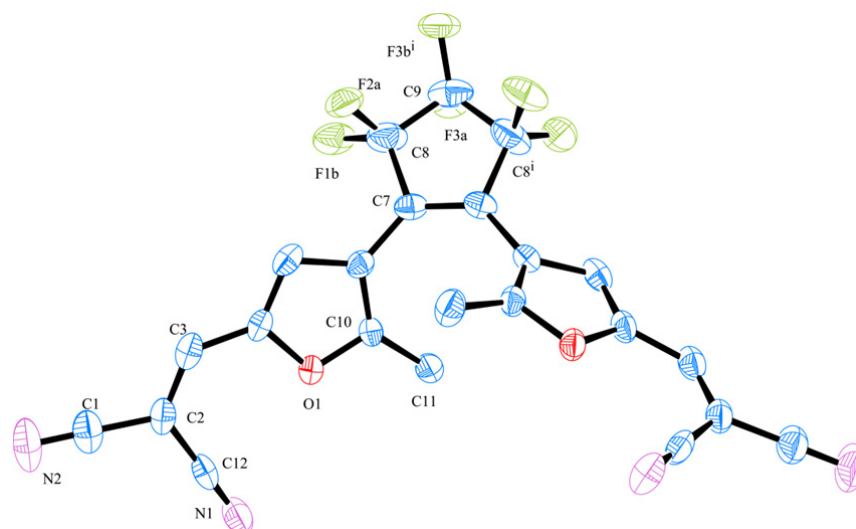

**Figure S4.** ORTEP of C5F-MN (7) with ellipsoids drawn at the 50% level and hydrogen atoms omitted for clarity.

**Table S17.** Crystal data and structure refinement parameters for C5F-MN (7)

|                                          | C5F-MN (7) (CCDC 894167)                                                                                                    |
|------------------------------------------|-----------------------------------------------------------------------------------------------------------------------------|
| Empirical formula                        | C <sub>23</sub> H <sub>10</sub> F <sub>6</sub> N <sub>4</sub> O <sub>2</sub>                                                |
| Formula weight                           | 488.35                                                                                                                      |
| Temperature                              | 100(2) K                                                                                                                    |
| Wavelength                               | 0.71073 Å                                                                                                                   |
| Crystal system                           | Monoclinic                                                                                                                  |
| Space group                              | <i>C</i> 2/c                                                                                                                |
| Unit cell dimensions                     | a = 21.890(4) Å $\alpha = 90^\circ$<br>b = 9.2771(15) Å $\beta = 99.344(12)^\circ$<br>c = 10.6726(14) Å $\gamma = 90^\circ$ |
| Volume                                   | 2138.6(6) Å <sup>3</sup>                                                                                                    |
| Z                                        | 4                                                                                                                           |
| Density (calculated)                     | 1.517 Mg/m <sup>3</sup>                                                                                                     |
| Absorption coefficient                   | 0.135 mm <sup>-1</sup>                                                                                                      |
| F(000)                                   | 984                                                                                                                         |
| Crystal size                             | 0.400 x 0.267 x 0.100 mm <sup>3</sup>                                                                                       |
| Theta range for data collection          | 1.89 to 26.82°.                                                                                                             |
| Index ranges                             | 27 ≤ h ≤ 27, -11 ≤ k ≤ 11, -13 ≤ l ≤ 12                                                                                     |
| Reflections collected                    | 14031                                                                                                                       |
| Independent reflections                  | 2275 [R(int) = 0.2274]                                                                                                      |
| Completeness to theta = 26.82°           | 99.2 %                                                                                                                      |
| Absorption correction                    | Integration                                                                                                                 |
| Max. and min. transmission               | 0.9871 and 0.9315                                                                                                           |
| Refinement method                        | Full-matrix least-squares on <i>F</i> <sup>2</sup>                                                                          |
| Data / restraints / parameters           | 2275 / 0 / 188                                                                                                              |
| Goodness-of-fit on <i>F</i> <sup>2</sup> | 0.985                                                                                                                       |
| Final R indices [I > 2σ(I)]              | <i>R</i> <sub>1</sub> = 0.0589, <i>wR</i> <sub>2</sub> = 0.1048                                                             |
| R indices (all data)                     | <i>R</i> <sub>1</sub> = 0.1270, <i>wR</i> <sub>2</sub> = 0.1219                                                             |
| Largest diff. peak and hole              | 0.209 and -0.202 e.Å <sup>-3</sup>                                                                                          |

**Table S18.** Atomic coordinates ( $\times 10^4$ ) and equivalent isotropic displacement parameters ( $\text{\AA}^2 \times 10^3$ ) for C5F-MN (7).

U(eq) is defined as one third of the trace of the orthogonalized  $U^{ij}$  tensor.

|       | x       | y        | z       | U(eq) |
|-------|---------|----------|---------|-------|
| F(1A) | 952(2)  | 10897(4) | 3393(6) | 55(2) |
| F(2A) | 468(3)  | 10723(5) | 701(5)  | 49(1) |
| F(3A) | 325(2)  | 12008(7) | 3674(4) | 58(2) |
| F(1B) | 1112(2) | 10820(4) | 2484(7) | 58(2) |
| F(2B) | 731(3)  | 10907(5) | 1341(7) | 53(1) |
| F(3B) | 72(3)   | 12724(5) | 3219(5) | 62(2) |
| O(1)  | 1257(1) | 5829(2)  | 2657(2) | 33(1) |
| N(1)  | 2070(1) | 2981(3)  | 3212(2) | 49(1) |
| N(2)  | 3089(1) | 3788(3)  | 94(3)   | 69(1) |
| C(1)  | 2707(1) | 4157(3)  | 637(3)  | 48(1) |
| C(2)  | 2231(1) | 4609(3)  | 1335(3) | 36(1) |
| C(3)  | 1914(1) | 5836(3)  | 1028(3) | 37(1) |
| C(4)  | 1445(1) | 6494(3)  | 1625(2) | 32(1) |
| C(5)  | 1130(1) | 7736(3)  | 1364(2) | 35(1) |
| C(6)  | 711(1)  | 7866(2)  | 2252(2) | 29(1) |
| C(7)  | 291(1)  | 9064(2)  | 2368(2) | 32(1) |
| C(8)  | 505(1)  | 10574(3) | 2197(4) | 58(1) |
| C(9)  | 0       | 11550(4) | 2500    | 51(1) |
| C(10) | 812(1)  | 6686(3)  | 3030(2) | 30(1) |
| C(11) | 572(1)  | 6215(3)  | 4176(3) | 41(1) |
| C(12) | 2139(1) | 3708(3)  | 2376(3) | 37(1) |

**Table S19.** Bond lengths [ $\text{\AA}$ ] and angles [ $^\circ$ ] for C5F-MN (7).

|                    |            |                     |          |              |          |
|--------------------|------------|---------------------|----------|--------------|----------|
| F(1A)-C(8)         | 1.507(5)   | O(1)-C(4)           | 1.383(3) | C(6)-C(10)   | 1.370(3) |
| F(2A)-C(8)         | 1.592(7)   | N(1)-C(12)          | 1.148(3) | C(6)-C(7)    | 1.461(3) |
| F(3A)-C(9)         | 1.403(4)   | N(2)-C(1)           | 1.144(4) | C(7)-C(7)#1  | 1.348(5) |
| F(1B)-C(8)         | 1.334(4)   | C(1)-C(2)           | 1.438(4) | C(7)-C(8)    | 1.498(4) |
| F(1B)-F(2B)        | 1.363(12)  | C(2)-C(3)           | 1.346(4) | C(8)-C(9)    | 1.504(4) |
| F(2B)-C(8)         | 1.150(6)   | C(2)-C(12)          | 1.430(4) | C(9)-F(3B)#1 | 1.327(5) |
| F(3B)-C(9)         | 1.327(5)   | C(3)-C(4)           | 1.430(4) | C(9)-F(3A)#1 | 1.403(4) |
| F(3B)-F(3B)#1      | 1.516(11)  | C(4)-C(5)           | 1.348(3) | C(9)-C(8)#1  | 1.504(4) |
| O(1)-C(10)         | 1.366(3)   | C(5)-C(6)           | 1.427(3) | C(10)-C(11)  | 1.474(4) |
|                    |            |                     |          |              |          |
| C(8)-F(1B)-F(2B)   | 50.4(3)    | F(2B)-C(8)-F(1A)    | 108.3(6) |              |          |
| C(8)-F(2B)-F(1B)   | 63.5(5)    | C(7)-C(8)-F(1A)     | 104.8(3) |              |          |
| C(9)-F(3B)-F(3B)#1 | 55.2(3)    | C(9)-C(8)-F(1A)     | 95.6(3)  |              |          |
| C(10)-O(1)-C(4)    | 106.92(18) | F(1B)-C(8)-F(2A)    | 95.8(5)  |              |          |
| N(2)-C(1)-C(2)     | 179.2(4)   | C(7)-C(8)-F(2A)     | 103.7(3) |              |          |
| C(3)-C(2)-C(12)    | 123.5(2)   | C(9)-C(8)-F(2A)     | 104.2(3) |              |          |
| C(3)-C(2)-C(1)     | 120.6(3)   | F(1A)-C(8)-F(2A)    | 138.8(5) |              |          |
| C(12)-C(2)-C(1)    | 115.9(2)   | F(3B)-C(9)-F(3B)#1  | 69.6(6)  |              |          |
| C(2)-C(3)-C(4)     | 129.2(2)   | F(3B)#1-C(9)-F(3A)  | 105.2(6) |              |          |
| C(5)-C(4)-O(1)     | 109.7(2)   | F(3B)-C(9)-F(3A)#1  | 105.2(6) |              |          |
| C(5)-C(4)-C(3)     | 130.7(2)   | F(3A)-C(9)-F(3A)#1  | 144.7(6) |              |          |
| O(1)-C(4)-C(3)     | 119.5(2)   | F(3B)-C(9)-C(8)#1   | 113.1(2) |              |          |
| C(4)-C(5)-C(6)     | 107.3(2)   | F(3B)#1-C(9)-C(8)#1 | 126.6(3) |              |          |
| C(10)-C(6)-C(5)    | 106.2(2)   | F(3A)-C(9)-C(8)#1   | 105.9(2) |              |          |
| C(10)-C(6)-C(7)    | 126.7(2)   | F(3A)#1-C(9)-C(8)#1 | 95.2(3)  |              |          |
| C(5)-C(6)-C(7)     | 127.0(2)   | F(3B)-C(9)-C(8)     | 126.6(3) |              |          |
| C(7)#1-C(7)-C(6)   | 130.33(13) | F(3B)#1-C(9)-C(8)   | 113.0(2) |              |          |
| C(7)#1-C(7)-C(8)   | 110.52(16) | F(3A)-C(9)-C(8)     | 95.2(3)  |              |          |
| C(6)-C(7)-C(8)     | 119.1(2)   | F(3A)#1-C(9)-C(8)   | 105.9(2) |              |          |
| F(2B)-C(8)-F(1B)   | 66.1(6)    | C(8)#1-C(9)-C(8)    | 106.0(3) |              |          |
| F(2B)-C(8)-C(7)    | 122.1(4)   | O(1)-C(10)-C(6)     | 109.9(2) |              |          |
| F(1B)-C(8)-C(7)    | 116.9(3)   | O(1)-C(10)-C(11)    | 115.8(2) |              |          |
| F(2B)-C(8)-C(9)    | 115.8(3)   | C(6)-C(10)-C(11)    | 134.2(2) |              |          |
| F(1B)-C(8)-C(9)    | 126.0(3)   | N(1)-C(12)-C(2)     | 179.5(3) |              |          |
| C(7)-C(8)-C(9)     | 106.3(3)   |                     |          |              |          |

Symmetry transformations used to generate equivalent atoms: #1 -x,y,-z+1/2

**Table S20.** Anisotropic displacement parameters ( $\text{\AA}^2 \times 10^3$ ) for C5F-MN (7).The anisotropic displacement factor exponent takes the form:  $-2\pi^2 [ h^2 a^{*2} U^{11} + \dots + 2 h k a^* b^* U^{12} ]$ 

|       | U <sup>11</sup> | U <sup>22</sup> | U <sup>33</sup> | U <sup>23</sup> | U <sup>13</sup> | U <sup>12</sup> |
|-------|-----------------|-----------------|-----------------|-----------------|-----------------|-----------------|
| F(1A) | 52(2)           | 45(2)           | 59(4)           | 2(2)            | -15(2)          | -17(2)          |
| F(2A) | 72(3)           | 36(2)           | 42(3)           | 10(2)           | 21(2)           | 0(2)            |
| F(3A) | 75(3)           | 49(3)           | 46(2)           | -13(2)          | 3(2)            | -18(2)          |
| F(1B) | 46(2)           | 37(2)           | 84(5)           | 7(2)            | -4(2)           | -14(2)          |
| F(2B) | 68(3)           | 37(2)           | 60(4)           | 10(2)           | 28(3)           | -4(2)           |
| F(3B) | 89(3)           | 32(2)           | 67(3)           | -18(2)          | 27(3)           | -17(2)          |
| O(1)  | 30(1)           | 34(1)           | 37(1)           | 3(1)            | 14(1)           | 2(1)            |
| N(1)  | 47(1)           | 54(2)           | 48(2)           | -2(1)           | 16(1)           | 17(1)           |
| N(2)  | 48(2)           | 95(2)           | 72(2)           | -26(2)          | 32(2)           | -3(1)           |
| C(1)  | 37(2)           | 60(2)           | 48(2)           | -18(2)          | 13(1)           | -7(1)           |
| C(2)  | 29(1)           | 46(2)           | 34(2)           | -9(1)           | 11(1)           | -7(1)           |
| C(3)  | 33(1)           | 47(2)           | 31(1)           | -5(1)           | 11(1)           | -11(1)          |
| C(4)  | 30(1)           | 38(1)           | 31(1)           | 2(1)            | 12(1)           | -7(1)           |
| C(5)  | 33(1)           | 41(1)           | 32(1)           | 6(1)            | 6(1)            | -11(1)          |
| C(6)  | 26(1)           | 28(1)           | 32(1)           | 0(1)            | 4(1)            | -6(1)           |
| C(7)  | 35(1)           | 27(1)           | 31(1)           | 3(1)            | -2(1)           | -2(1)           |
| C(8)  | 41(2)           | 36(2)           | 93(3)           | 14(2)           | -1(2)           | -7(1)           |
| C(9)  | 84(3)           | 28(2)           | 37(2)           | 0               | 3(2)            | 0               |
| C(10) | 23(1)           | 32(1)           | 35(1)           | 1(1)            | 7(1)            | 2(1)            |
| C(11) | 43(2)           | 40(2)           | 44(2)           | 10(1)           | 18(1)           | 11(1)           |
| C(12) | 30(1)           | 44(2)           | 39(2)           | -12(1)          | 9(1)            | 9(1)            |

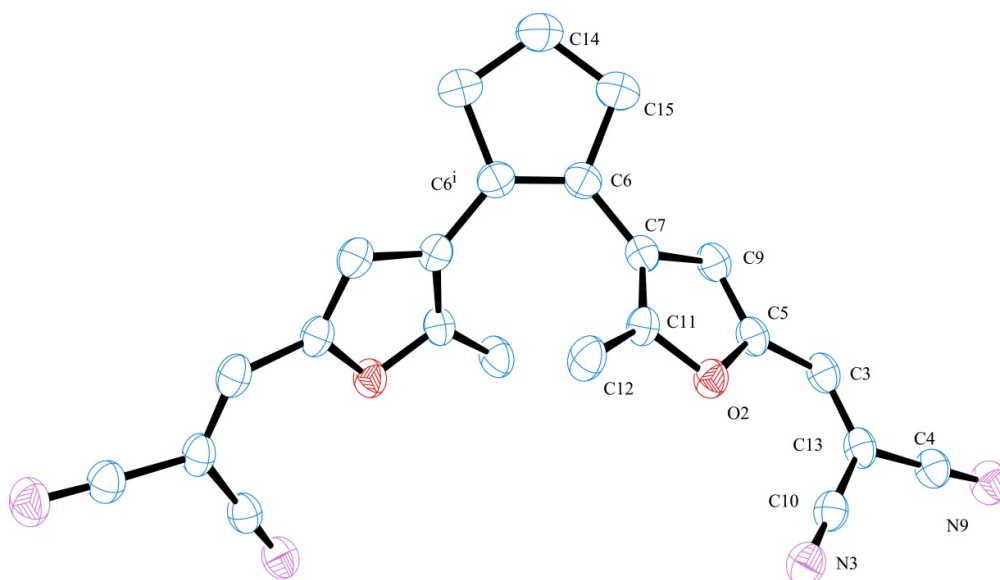

**Figure S5.** ORTEP of C5H-MN (**14**) with ellipsoids drawn at the 50% level and hydrogen atoms omitted for clarity.

**Table S21.** Crystal data and structure refinement parameters for C5H-MN (**14**)

| C5H-MN ( <b>14</b> ) (CCDC 1946676) |                                                                                                                             |
|-------------------------------------|-----------------------------------------------------------------------------------------------------------------------------|
| Empirical formula                   | C <sub>23</sub> H <sub>16</sub> N <sub>4</sub> O <sub>2</sub>                                                               |
| Formula weight                      | 380.40                                                                                                                      |
| Temperature                         | 100(2) K                                                                                                                    |
| Wavelength                          | 0.71073 Å                                                                                                                   |
| Crystal system                      | Monoclinic                                                                                                                  |
| Space group                         | C 2/c                                                                                                                       |
| Unit cell dimensions                | a = 21.831(3) Å $\alpha = 90^\circ$<br>b = 9.0389(8) Å $\beta = 101.746(10)^\circ$<br>c = 10.1044(13) Å $\gamma = 90^\circ$ |
| Volume                              | 1952.2(4) Å <sup>3</sup>                                                                                                    |
| Z                                   | 4                                                                                                                           |
| Density (calculated)                | 1.294 Mg/m <sup>3</sup>                                                                                                     |
| Absorption coefficient              | 0.086 mm <sup>-1</sup>                                                                                                      |
| F(000)                              | 792                                                                                                                         |
| Crystal size                        | 0.900 x 0.800 x 0.750 mm <sup>3</sup>                                                                                       |
| Theta range for data collection     | 1.906 to 26.171°                                                                                                            |
| Index ranges                        | -26 ≤ h ≤ 26, -11 ≤ k ≤ 11, -12 ≤ l ≤ 12                                                                                    |
| Reflections collected               | 11920                                                                                                                       |
| Independent reflections             | 1960 [R(int) = 0.2671]                                                                                                      |
| Completeness to theta = 25.242°     | 99.9 %                                                                                                                      |
| Absorption correction               | Integration                                                                                                                 |
| Max. and min. transmission          | 0.9794 and 0.9430                                                                                                           |
| Refinement method                   | Full-matrix least-squares on F <sup>2</sup>                                                                                 |
| Data / restraints / parameters      | 1960 / 0 / 133                                                                                                              |
| Goodness-of-fit on F <sup>2</sup>   | 1.045                                                                                                                       |
| Final R indices [I > 2σ(I)]         | R <sub>1</sub> = 0.0559, wR <sub>2</sub> = 0.1328                                                                           |
| R indices (all data)                | R <sub>1</sub> = 0.0901, wR <sub>2</sub> = 0.1425                                                                           |
| Largest diff. peak and hole         | 0.293 and -0.204 e.Å <sup>-3</sup>                                                                                          |

**Table S22.** Atomic coordinates ( $\times 10^4$ ) and equivalent isotropic displacement parameters ( $\text{\AA}^2 \times 10^3$ ) for C5H-MN (14).

U(eq) is defined as one third of the trace of the orthogonalized  $U^{ij}$  tensor.

|       | x       | y        | z       | U(eq) |
|-------|---------|----------|---------|-------|
| O(2)  | 1238(1) | 944(2)   | 7697(1) | 34(1) |
| N(3)  | 1938(1) | -2181(2) | 8039(2) | 40(1) |
| C(3)  | 1902(1) | 1015(2)  | 6044(2) | 35(1) |
| C(4)  | 2683(1) | -710(2)  | 5602(2) | 37(1) |
| C(5)  | 1437(1) | 1666(2)  | 6654(2) | 33(1) |
| C(6)  | 294(1)  | 4346(2)  | 7396(2) | 34(1) |
| C(7)  | 709(1)  | 3091(2)  | 7302(2) | 32(1) |
| N(9)  | 3078(1) | -999(2)  | 5050(2) | 47(1) |
| C(9)  | 1130(1) | 2972(2)  | 6400(2) | 35(1) |
| C(10) | 2054(1) | -1346(2) | 7271(2) | 34(1) |
| C(11) | 800(1)  | 1838(2)  | 8081(2) | 32(1) |
| C(12) | 550(1)  | 1304(2)  | 9255(2) | 41(1) |
| C(13) | 2193(1) | -306(2)  | 6302(2) | 34(1) |
| C(14) | 0       | 6876(4)  | 7500    | 55(1) |
| C(15) | 529(1)  | 5898(2)  | 7264(3) | 51(1) |

**Table S23.** Bond lengths [Å] and angles [°] for C5H-MN (**14**).

---

|                   |            |                     |            |               |          |
|-------------------|------------|---------------------|------------|---------------|----------|
| O(2)-C(11)        | 1.368(2)   | C(4)-C(13)          | 1.445(3)   | C(7)-C(9)     | 1.425(3) |
| O(2)-C(5)         | 1.382(2)   | C(5)-C(9)           | 1.356(3)   | C(10)-C(13)   | 1.434(3) |
| N(3)-C(10)        | 1.147(3)   | C(6)-C(6)#1         | 1.343(4)   | C(11)-C(12)   | 1.483(3) |
| C(3)-C(13)        | 1.353(3)   | C(6)-C(7)           | 1.466(3)   | C(14)-C(15)   | 1.512(3) |
| C(3)-C(5)         | 1.418(3)   | C(6)-C(15)          | 1.509(3)   | C(14)-C(15)#1 | 1.512(3) |
| C(4)-N(9)         | 1.148(3)   | C(7)-C(11)          | 1.370(3)   |               |          |
| <hr/>             |            |                     |            |               |          |
| C(11)-O(2)-C(5)   | 106.53(15) | C(9)-C(7)-C(6)      | 125.92(17) |               |          |
| C(13)-C(3)-C(5)   | 129.15(18) | C(5)-C(9)-C(7)      | 107.68(17) |               |          |
| N(9)-C(4)-C(13)   | 178.4(2)   | N(3)-C(10)-C(13)    | 179.5(2)   |               |          |
| C(9)-C(5)-O(2)    | 109.54(17) | O(2)-C(11)-C(7)     | 110.69(16) |               |          |
| C(9)-C(5)-C(3)    | 130.46(17) | O(2)-C(11)-C(12)    | 115.26(16) |               |          |
| O(2)-C(5)-C(3)    | 119.99(17) | C(7)-C(11)-C(12)    | 133.98(18) |               |          |
| C(6)#1-C(6)-C(7)  | 129.22(11) | C(3)-C(13)-C(10)    | 123.67(17) |               |          |
| C(6)#1-C(6)-C(15) | 111.52(12) | C(3)-C(13)-C(4)     | 119.61(18) |               |          |
| C(7)-C(6)-C(15)   | 119.25(18) | C(10)-C(13)-C(4)    | 116.71(18) |               |          |
| C(11)-C(7)-C(9)   | 105.54(17) | C(15)-C(14)-C(15)#1 | 108.4(3)   |               |          |
| C(11)-C(7)-C(6)   | 128.47(18) | C(6)-C(15)-C(14)    | 104.23(19) |               |          |

---

Symmetry transformations used to generate equivalent atoms: #1 -x,y,-z+3/2



**Table S24.** Anisotropic displacement parameters ( $\text{\AA}^2 \times 10^3$ ) for C5H-MN (**14**).The anisotropic displacement factor exponent takes the form:  $-2\pi^2 [ h^2 a^{*2} U^{11} + \dots + 2 h k a^* b^* U^{12} ]$ 

|       | U <sup>11</sup> | U <sup>22</sup> | U <sup>33</sup> | U <sup>23</sup> | U <sup>13</sup> | U <sup>12</sup> |
|-------|-----------------|-----------------|-----------------|-----------------|-----------------|-----------------|
| O(2)  | 33(1)           | 39(1)           | 33(1)           | 4(1)            | 14(1)           | 2(1)            |
| N(3)  | 41(1)           | 46(1)           | 37(1)           | -2(1)           | 14(1)           | 4(1)            |
| C(3)  | 32(1)           | 45(1)           | 29(1)           | -1(1)           | 10(1)           | -6(1)           |
| C(4)  | 37(1)           | 42(1)           | 34(1)           | -2(1)           | 11(1)           | -2(1)           |
| C(5)  | 32(1)           | 40(1)           | 29(1)           | 2(1)            | 12(1)           | -5(1)           |
| C(6)  | 36(1)           | 34(1)           | 33(1)           | 2(1)            | 7(1)            | -2(1)           |
| C(7)  | 30(1)           | 35(1)           | 33(1)           | -1(1)           | 7(1)            | -4(1)           |
| N(9)  | 45(1)           | 56(1)           | 45(1)           | -6(1)           | 22(1)           | -1(1)           |
| C(9)  | 33(1)           | 40(1)           | 33(1)           | 3(1)            | 10(1)           | -5(1)           |
| C(10) | 32(1)           | 42(1)           | 30(1)           | -5(1)           | 9(1)            | 2(1)            |
| C(11) | 29(1)           | 38(1)           | 33(1)           | -1(1)           | 11(1)           | 2(1)            |
| C(12) | 41(1)           | 48(1)           | 38(1)           | 8(1)            | 18(1)           | 8(1)            |
| C(13) | 31(1)           | 45(1)           | 28(1)           | -4(1)           | 12(1)           | -4(1)           |
| C(14) | 62(2)           | 36(2)           | 72(2)           | 0               | 24(2)           | 0               |
| C(15) | 52(1)           | 36(1)           | 68(2)           | 4(1)            | 18(1)           | -3(1)           |

**Table S25.** Torsion angles [°] for C5H-MN (**14**).

---

|                          |             |
|--------------------------|-------------|
| C(11)-O(2)-C(5)-C(9)     | 0.1(2)      |
| C(11)-O(2)-C(5)-C(3)     | 179.37(17)  |
| C(13)-C(3)-C(5)-C(9)     | -178.6(2)   |
| C(13)-C(3)-C(5)-O(2)     | 2.3(3)      |
| C(6)#1-C(6)-C(7)-C(11)   | -41.8(4)    |
| C(15)-C(6)-C(7)-C(11)    | 137.4(2)    |
| C(6)#1-C(6)-C(7)-C(9)    | 141.7(3)    |
| C(15)-C(6)-C(7)-C(9)     | -39.1(3)    |
| O(2)-C(5)-C(9)-C(7)      | -0.9(2)     |
| C(3)-C(5)-C(9)-C(7)      | 179.92(19)  |
| C(11)-C(7)-C(9)-C(5)     | 1.3(2)      |
| C(6)-C(7)-C(9)-C(5)      | 178.52(18)  |
| C(5)-O(2)-C(11)-C(7)     | 0.8(2)      |
| C(5)-O(2)-C(11)-C(12)    | -176.55(17) |
| C(9)-C(7)-C(11)-O(2)     | -1.3(2)     |
| C(6)-C(7)-C(11)-O(2)     | -178.41(18) |
| C(9)-C(7)-C(11)-C(12)    | 175.4(2)    |
| C(6)-C(7)-C(11)-C(12)    | -1.7(4)     |
| C(5)-C(3)-C(13)-C(10)    | 2.0(3)      |
| C(5)-C(3)-C(13)-C(4)     | -176.44(19) |
| C(6)#1-C(6)-C(15)-C(14)  | 2.9(3)      |
| C(7)-C(6)-C(15)-C(14)    | -176.45(15) |
| C(15)#1-C(14)-C(15)-C(6) | -0.97(10)   |

---

Symmetry transformations used to generate equivalent atoms: #1 -x,y,-z+3/2

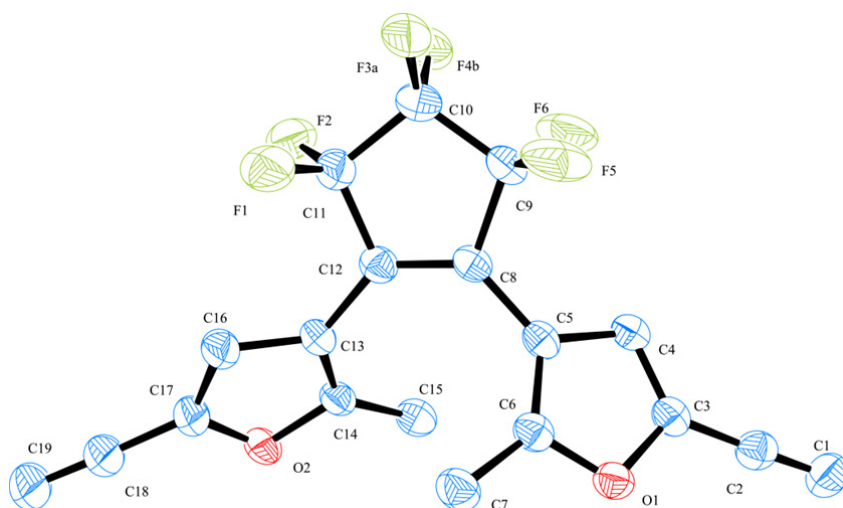

**Figure S6.** ORTEP of C5F-yne (**18**) with ellipsoids drawn at the 50% level and hydrogen atoms omitted for clarity.

**Table S26.** Crystal data and structure refinement parameters for C5F-yne (**18**)

| C5F- yne ( <b>18</b> ) (CCDC 2016261) |                                                                                                                        |
|---------------------------------------|------------------------------------------------------------------------------------------------------------------------|
| Empirical formula                     | C <sub>19</sub> H <sub>10</sub> F <sub>6</sub> O <sub>2</sub>                                                          |
| Formula weight                        | 384.27                                                                                                                 |
| Temperature                           | 100(2) K                                                                                                               |
| Wavelength                            | 0.71073 Å                                                                                                              |
| Crystal system                        | Triclinic                                                                                                              |
| Space group                           | P -1                                                                                                                   |
| Unit cell dimensions                  | a = 7.1470(10) Å      α = 81.952(12)°<br>b = 8.3925(12) Å      β = 87.947(12)°<br>c = 14.495(2) Å      γ = 78.899(12)° |
| Volume                                | 844.7(2) Å <sup>3</sup>                                                                                                |
| Z                                     | 2                                                                                                                      |
| Density (calculated)                  | 1.511 Mg/m <sup>3</sup>                                                                                                |
| Absorption coefficient                | 0.142 mm <sup>-1</sup>                                                                                                 |
| F(000)                                | 388                                                                                                                    |
| Crystal size                          | 0.900 x 0.667 x 0.200 mm <sup>3</sup>                                                                                  |
| Theta range for data collection       | 1.419 to 24.716°.                                                                                                      |
| Index ranges                          | -8 ≤ h ≤ 8, -9 ≤ k ≤ 9, -16 ≤ l ≤ 17                                                                                   |
| Reflections collected                 | 9373                                                                                                                   |
| Independent reflections               | 2841 [R(int) = 0.0674]                                                                                                 |
| Completeness to theta = 25.242°       | 93.1 %                                                                                                                 |
| Absorption correction                 | Integration                                                                                                            |
| Max. and min. transmission            | 0.9788 and 0.9412                                                                                                      |
| Refinement method                     | Full-matrix least-squares on F <sup>2</sup>                                                                            |
| Data / restraints / parameters        | 2841 / 0 / 265                                                                                                         |
| Goodness-of-fit on F <sup>2</sup>     | 0.920                                                                                                                  |
| Final R indices [I > 2σ(I)]           | R <sub>1</sub> = 0.0386, wR <sub>2</sub> = 0.0882                                                                      |
| R indices (all data)                  | R <sub>1</sub> = 0.0644, wR <sub>2</sub> = 0.0961                                                                      |
| Largest diff. peak and hole           | 0.183 and -0.197 e.Å <sup>-3</sup>                                                                                     |

**Table S27.** Atomic coordinates ( $\times 10^4$ ) and equivalent isotropic displacement parameters ( $\text{\AA}^2 \times 10^3$ ) for C5F-yne (**18**).

U(eq) is defined as one third of the trace of the orthogonalized  $U_{ij}$  tensor.

|       | x         | y         | z        | U(eq)  |
|-------|-----------|-----------|----------|--------|
| F(1)  | 10134(2)  | 7066(2)   | 4555(1)  | 57(1)  |
| F(2)  | 7898(2)   | 9044(2)   | 4024(1)  | 52(1)  |
| F(5)  | 13805(2)  | 8707(2)   | 2730(1)  | 67(1)  |
| F(6)  | 11635(2)  | 10670(2)  | 2164(1)  | 66(1)  |
| O(1)  | 12323(2)  | 6120(2)   | 199(1)   | 34(1)  |
| O(2)  | 5930(2)   | 5368(2)   | 2315(1)  | 35(1)  |
| C(1)  | 13350(3)  | 8518(3)   | -1841(2) | 44(1)  |
| C(2)  | 12896(3)  | 8147(3)   | -1060(2) | 36(1)  |
| C(3)  | 12362(3)  | 7752(2)   | -114(1)  | 31(1)  |
| C(4)  | 11890(3)  | 8645(3)   | 588(1)   | 30(1)  |
| C(5)  | 11494(2)  | 7554(2)   | 1388(1)  | 28(1)  |
| C(6)  | 11798(3)  | 6031(3)   | 1116(1)  | 32(1)  |
| C(7)  | 11707(3)  | 4375(3)   | 1594(2)  | 39(1)  |
| C(8)  | 10938(3)  | 7997(2)   | 2313(1)  | 28(1)  |
| C(9)  | 11906(3)  | 9199(3)   | 2696(1)  | 33(1)  |
| C(10) | 11073(4)  | 9377(4)   | 3657(2)  | 58(1)  |
| C(11) | 9638(3)   | 8214(3)   | 3812(1)  | 38(1)  |
| C(12) | 9633(3)   | 7491(3)   | 2923(1)  | 31(1)  |
| C(13) | 8237(3)   | 6457(2)   | 2840(1)  | 31(1)  |
| C(14) | 7191(3)   | 6399(2)   | 2079(1)  | 31(1)  |
| C(15) | 7070(3)   | 7233(3)   | 1112(1)  | 36(1)  |
| C(16) | 7557(3)   | 5410(3)   | 3593(2)  | 38(1)  |
| C(17) | 6184(3)   | 4783(3)   | 3247(1)  | 38(1)  |
| C(18) | 5005(3)   | 3691(3)   | 3666(2)  | 48(1)  |
| C(19) | 4059(4)   | 2784(4)   | 4043(2)  | 66(1)  |
| F(3A) | 12067(14) | 9454(11)  | 4314(3)  | 52(2)  |
| F(4A) | 10730(20) | 10639(17) | 3956(10) | 85(4)  |
| F(3B) | 12765(12) | 8440(30)  | 4262(4)  | 104(4) |
| F(4B) | 9830(11)  | 11069(5)  | 3525(6)  | 51(2)  |

**Table S28.** Bond lengths [Å] and angles [°] for C5F- yne (**18**).

|                   |            |                   |            |             |           |
|-------------------|------------|-------------------|------------|-------------|-----------|
| F(1)-C(11)        | 1.350(3)   | C(4)-C(5)         | 1.429(3)   | C(10)-F(3B) | 1.538(10) |
| F(2)-C(11)        | 1.351(2)   | C(5)-C(6)         | 1.365(3)   | C(11)-C(12) | 1.498(3)  |
| F(5)-C(9)         | 1.341(2)   | C(5)-C(8)         | 1.463(3)   | C(12)-C(13) | 1.462(3)  |
| F(6)-C(9)         | 1.345(2)   | C(6)-C(7)         | 1.476(3)   | C(13)-C(14) | 1.367(3)  |
| O(1)-C(6)         | 1.364(2)   | C(8)-C(12)        | 1.349(3)   | C(13)-C(16) | 1.434(3)  |
| O(1)-C(3)         | 1.386(2)   | C(8)-C(9)         | 1.502(3)   | C(14)-C(15) | 1.474(3)  |
| O(2)-C(14)        | 1.369(2)   | C(9)-C(10)        | 1.511(3)   | C(16)-C(17) | 1.341(3)  |
| O(2)-C(17)        | 1.377(2)   | C(10)-F(4A)       | 1.179(8)   | C(17)-C(18) | 1.422(3)  |
| C(1)-C(2)         | 1.182(3)   | C(10)-F(3A)       | 1.225(6)   | C(18)-C(19) | 1.179(3)  |
| C(2)-C(3)         | 1.421(3)   | C(10)-F(4B)       | 1.514(6)   | F(3A)-F(4A) | 1.30(3)   |
| C(3)-C(4)         | 1.343(3)   | C(10)-C(11)       | 1.537(3)   |             |           |
| C(6)-O(1)-C(3)    | 106.84(15) | F(3A)-C(10)-C(11) | 117.9(3)   |             |           |
| C(14)-O(2)-C(17)  | 107.00(15) | C(9)-C(10)-C(11)  | 105.42(18) |             |           |
| C(1)-C(2)-C(3)    | 178.1(2)   | F(4B)-C(10)-C(11) | 103.9(3)   |             |           |
| C(4)-C(3)-O(1)    | 109.62(17) | C(9)-C(10)-F(3B)  | 100.4(5)   |             |           |
| C(4)-C(3)-C(2)    | 133.3(2)   | F(4B)-C(10)-F(3B) | 138.0(11)  |             |           |
| O(1)-C(3)-C(2)    | 117.11(17) | C(11)-C(10)-F(3B) | 102.7(5)   |             |           |
| C(3)-C(4)-C(5)    | 107.39(18) | F(1)-C(11)-F(2)   | 105.32(17) |             |           |
| C(6)-C(5)-C(4)    | 106.09(17) | F(1)-C(11)-C(12)  | 112.69(18) |             |           |
| C(6)-C(5)-C(8)    | 127.66(18) | F(2)-C(11)-C(12)  | 112.22(16) |             |           |
| C(4)-C(5)-C(8)    | 126.22(18) | F(1)-C(11)-C(10)  | 110.53(19) |             |           |
| O(1)-C(6)-C(5)    | 110.04(17) | F(2)-C(11)-C(10)  | 110.2(2)   |             |           |
| O(1)-C(6)-C(7)    | 115.67(17) | C(12)-C(11)-C(10) | 105.91(17) |             |           |
| C(5)-C(6)-C(7)    | 134.28(18) | C(8)-C(12)-C(13)  | 131.35(18) |             |           |
| C(12)-C(8)-C(5)   | 130.20(18) | C(8)-C(12)-C(11)  | 111.01(17) |             |           |
| C(12)-C(8)-C(9)   | 110.97(17) | C(13)-C(12)-C(11) | 117.59(16) |             |           |
| C(5)-C(8)-C(9)    | 118.83(16) | C(14)-C(13)-C(16) | 106.31(17) |             |           |
| F(5)-C(9)-F(6)    | 104.70(18) | C(14)-C(13)-C(12) | 128.10(18) |             |           |
| F(5)-C(9)-C(8)    | 112.21(16) | C(16)-C(13)-C(12) | 125.31(17) |             |           |
| F(6)-C(9)-C(8)    | 112.58(17) | C(13)-C(14)-O(2)  | 109.59(17) |             |           |
| F(5)-C(9)-C(10)   | 111.03(19) | C(13)-C(14)-C(15) | 134.86(18) |             |           |
| F(6)-C(9)-C(10)   | 109.82(19) | O(2)-C(14)-C(15)  | 115.47(16) |             |           |
| C(8)-C(9)-C(10)   | 106.57(16) | C(17)-C(16)-C(13) | 106.90(18) |             |           |
| F(4A)-C(10)-F(3A) | 65.6(14)   | C(16)-C(17)-O(2)  | 110.19(18) |             |           |
| F(4A)-C(10)-C(9)  | 123.1(6)   | C(16)-C(17)-C(18) | 132.0(2)   |             |           |
| F(3A)-C(10)-C(9)  | 121.8(4)   | O(2)-C(17)-C(18)  | 117.78(18) |             |           |
| C(9)-C(10)-F(4B)  | 103.1(3)   | C(19)-C(18)-C(17) | 177.6(3)   |             |           |
| F(4A)-C(10)-C(11) | 119.5(4)   | C(10)-F(3A)-F(4A) | 55.5(7)    |             |           |
|                   |            | C(10)-F(4A)-F(3A) | 58.9(9)    |             |           |

**Table S29.** Anisotropic displacement parameters ( $\text{\AA}^2 \times 10^3$ ) for C5F- yne (**18**).The anisotropic displacement factor exponent takes the form:  $-2\pi^2 [ h^2 a^{*2} U^{11} + \dots + 2 h k a^* b^* U^{12} ]$ 

|       | U <sup>11</sup> | U <sup>22</sup> | U <sup>33</sup> | U <sup>23</sup> | U <sup>13</sup> | U <sup>12</sup> |
|-------|-----------------|-----------------|-----------------|-----------------|-----------------|-----------------|
| F(1)  | 83(1)           | 54(1)           | 37(1)           | -3(1)           | -17(1)          | -21(1)          |
| F(2)  | 50(1)           | 59(1)           | 52(1)           | -25(1)          | 6(1)            | -13(1)          |
| F(5)  | 28(1)           | 70(1)           | 117(1)          | -56(1)          | -3(1)           | -13(1)          |
| F(6)  | 116(1)          | 30(1)           | 58(1)           | -5(1)           | -16(1)          | -28(1)          |
| O(1)  | 33(1)           | 28(1)           | 40(1)           | -8(1)           | 1(1)            | -6(1)           |
| O(2)  | 30(1)           | 38(1)           | 42(1)           | -9(1)           | 1(1)            | -18(1)          |
| C(1)  | 46(1)           | 42(1)           | 40(1)           | -6(1)           | 6(1)            | -3(1)           |
| C(2)  | 32(1)           | 34(1)           | 41(1)           | -8(1)           | -1(1)           | -3(1)           |
| C(3)  | 27(1)           | 28(1)           | 38(1)           | -2(1)           | -3(1)           | -5(1)           |
| C(4)  | 26(1)           | 25(1)           | 37(1)           | -4(1)           | -3(1)           | -5(1)           |
| C(5)  | 22(1)           | 27(1)           | 35(1)           | -1(1)           | -4(1)           | -6(1)           |
| C(6)  | 27(1)           | 30(1)           | 38(1)           | -5(1)           | -2(1)           | -6(1)           |
| C(7)  | 40(1)           | 28(1)           | 48(1)           | -4(1)           | 2(1)            | -6(1)           |
| C(8)  | 26(1)           | 26(1)           | 33(1)           | -3(1)           | -6(1)           | -6(1)           |
| C(9)  | 30(1)           | 27(1)           | 44(1)           | -5(1)           | -1(1)           | -9(1)           |
| C(10) | 72(2)           | 76(2)           | 44(1)           | -25(1)          | 6(1)            | -49(2)          |
| C(11) | 40(1)           | 41(1)           | 34(1)           | -5(1)           | -1(1)           | -14(1)          |
| C(12) | 30(1)           | 31(1)           | 32(1)           | -4(1)           | -3(1)           | -9(1)           |
| C(13) | 30(1)           | 30(1)           | 33(1)           | -4(1)           | 1(1)            | -11(1)          |
| C(14) | 27(1)           | 28(1)           | 39(1)           | -8(1)           | 3(1)            | -9(1)           |
| C(15) | 31(1)           | 38(1)           | 40(1)           | -6(1)           | -6(1)           | -10(1)          |
| C(16) | 44(1)           | 42(1)           | 33(1)           | -5(1)           | -1(1)           | -19(1)          |
| C(17) | 41(1)           | 42(1)           | 36(1)           | -6(1)           | 5(1)            | -19(1)          |
| C(18) | 54(1)           | 54(2)           | 44(1)           | -13(1)          | 8(1)            | -28(1)          |
| C(19) | 83(2)           | 79(2)           | 54(2)           | -21(1)          | 22(1)           | -55(2)          |
| F(3A) | 56(4)           | 72(4)           | 40(2)           | -10(2)          | -10(2)          | -36(3)          |
| F(4A) | 104(7)          | 89(6)           | 95(6)           | -64(6)          | 54(6)           | -70(6)          |
| F(3B) | 54(3)           | 205(12)         | 57(2)           | 18(4)           | -24(2)          | -59(5)          |
| F(4B) | 62(3)           | 29(2)           | 68(3)           | -19(2)          | 22(3)           | -13(2)          |

**Table S30.** Torsion angles [°] for C5F- yne (**18**).

|                        |             |                         |             |
|------------------------|-------------|-------------------------|-------------|
| C(6)-O(1)-C(3)-C(4)    | 0.4(2)      | F(3A)-C(10)-C(11)-F(2)  | 95.6(6)     |
| C(6)-O(1)-C(3)-C(2)    | 179.40(16)  | C(9)-C(10)-C(11)-F(2)   | -124.4(2)   |
| O(1)-C(3)-C(4)-C(5)    | -1.0(2)     | F(4B)-C(10)-C(11)-F(2)  | -16.3(4)    |
| C(2)-C(3)-C(4)-C(5)    | -179.8(2)   | F(3B)-C(10)-C(11)-F(2)  | 130.9(6)    |
| C(3)-C(4)-C(5)-C(6)    | 1.2(2)      | F(4A)-C(10)-C(11)-C(12) | 141.0(12)   |
| C(3)-C(4)-C(5)-C(8)    | 179.46(17)  | F(3A)-C(10)-C(11)-C(12) | -142.7(6)   |
| C(3)-O(1)-C(6)-C(5)    | 0.4(2)      | C(9)-C(10)-C(11)-C(12)  | -2.8(3)     |
| C(3)-O(1)-C(6)-C(7)    | -178.77(16) | F(4B)-C(10)-C(11)-C(12) | 105.3(4)    |
| C(4)-C(5)-C(6)-O(1)    | -1.0(2)     | F(3B)-C(10)-C(11)-C(12) | -107.5(6)   |
| C(8)-C(5)-C(6)-O(1)    | -179.18(16) | C(5)-C(8)-C(12)-C(13)   | -6.0(4)     |
| C(4)-C(5)-C(6)-C(7)    | 177.9(2)    | C(9)-C(8)-C(12)-C(13)   | 174.0(2)    |
| C(8)-C(5)-C(6)-C(7)    | -0.2(4)     | C(5)-C(8)-C(12)-C(11)   | 176.81(19)  |
| C(6)-C(5)-C(8)-C(12)   | -42.9(3)    | C(9)-C(8)-C(12)-C(11)   | -3.2(2)     |
| C(4)-C(5)-C(8)-C(12)   | 139.3(2)    | F(1)-C(11)-C(12)-C(8)   | -117.2(2)   |
| C(6)-C(5)-C(8)-C(9)    | 137.1(2)    | F(2)-C(11)-C(12)-C(8)   | 124.13(19)  |
| C(4)-C(5)-C(8)-C(9)    | -40.7(3)    | C(10)-C(11)-C(12)-C(8)  | 3.8(3)      |
| C(12)-C(8)-C(9)-F(5)   | 123.0(2)    | F(1)-C(11)-C(12)-C(13)  | 65.2(2)     |
| C(5)-C(8)-C(9)-F(5)    | -57.0(2)    | F(2)-C(11)-C(12)-C(13)  | -53.5(2)    |
| C(12)-C(8)-C(9)-F(6)   | -119.21(19) | C(10)-C(11)-C(12)-C(13) | -173.8(2)   |
| C(5)-C(8)-C(9)-F(6)    | 60.8(2)     | C(8)-C(12)-C(13)-C(14)  | -37.2(4)    |
| C(12)-C(8)-C(9)-C(10)  | 1.2(2)      | C(11)-C(12)-C(13)-C(14) | 139.9(2)    |
| C(5)-C(8)-C(9)-C(10)   | -178.75(19) | C(8)-C(12)-C(13)-C(16)  | 149.8(2)    |
| F(5)-C(9)-C(10)-F(4A)  | 96.5(11)    | C(11)-C(12)-C(13)-C(16) | -33.2(3)    |
| F(6)-C(9)-C(10)-F(4A)  | -18.8(11)   | C(16)-C(13)-C(14)-O(2)  | -0.7(2)     |
| C(8)-C(9)-C(10)-F(4A)  | -141.0(11)  | C(12)-C(13)-C(14)-O(2)  | -174.81(18) |
| F(5)-C(9)-C(10)-F(3A)  | 16.6(6)     | C(16)-C(13)-C(14)-C(15) | 175.8(2)    |
| F(6)-C(9)-C(10)-F(3A)  | -98.7(6)    | C(12)-C(13)-C(14)-C(15) | 1.7(4)      |
| C(8)-C(9)-C(10)-F(3A)  | 139.1(5)    | C(17)-O(2)-C(14)-C(13)  | 0.6(2)      |
| F(5)-C(9)-C(10)-F(4B)  | 129.9(4)    | C(17)-O(2)-C(14)-C(15)  | -176.72(17) |
| F(6)-C(9)-C(10)-F(4B)  | 14.6(4)     | C(14)-C(13)-C(16)-C(17) | 0.6(2)      |
| C(8)-C(9)-C(10)-F(4B)  | -107.6(4)   | C(12)-C(13)-C(16)-C(17) | 174.9(2)    |
| F(5)-C(9)-C(10)-C(11)  | -121.4(2)   | C(13)-C(16)-C(17)-O(2)  | -0.3(2)     |
| F(6)-C(9)-C(10)-C(11)  | 123.3(2)    | C(13)-C(16)-C(17)-C(18) | -179.5(2)   |
| C(8)-C(9)-C(10)-C(11)  | 1.1(3)      | C(14)-O(2)-C(17)-C(16)  | -0.2(2)     |
| F(5)-C(9)-C(10)-F(3B)  | -15.0(7)    | C(14)-O(2)-C(17)-C(18)  | 179.15(19)  |
| F(6)-C(9)-C(10)-F(3B)  | -130.3(7)   | C(9)-C(10)-F(3A)-F(4A)  | 115.2(4)    |
| C(8)-C(9)-C(10)-F(3B)  | 107.5(6)    | F(4B)-C(10)-F(3A)-F(4A) | 1.3(4)      |
| F(4A)-C(10)-C(11)-F(1) | -96.7(12)   | C(11)-C(10)-F(3A)-F(4A) | -111.8(5)   |
| F(3A)-C(10)-C(11)-F(1) | -20.4(7)    | F(3B)-C(10)-F(3A)-F(4A) | 175.9(7)    |
| C(9)-C(10)-C(11)-F(1)  | 119.5(2)    | C(9)-C(10)-F(4A)-F(3A)  | -113.3(6)   |
| F(4B)-C(10)-C(11)-F(1) | -132.4(4)   | F(4B)-C(10)-F(4A)-F(3A) | -177.9(6)   |
| F(3B)-C(10)-C(11)-F(1) | 14.9(6)     | C(11)-C(10)-F(4A)-F(3A) | 109.6(7)    |
| F(4A)-C(10)-C(11)-F(2) | 19.4(12)    | F(3B)-C(10)-F(4A)-F(3A) | -2.4(4)     |

## (D) Plots of one- and two dimensional NMR Spectra

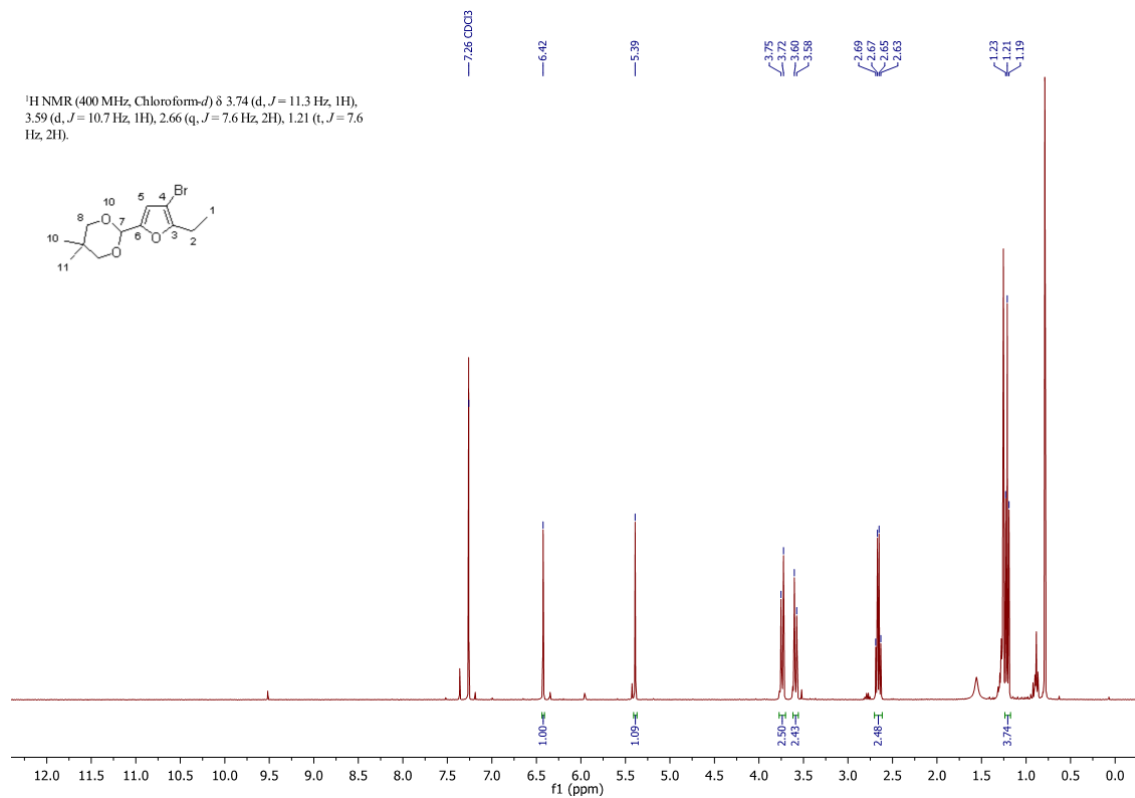

**Figure S7.** <sup>1</sup>H NMR spectrum of 2-(4-bromo-5-ethylfuran-2-yl)-5,5-dimethyl-1,3-dioxane in CDCl<sub>3</sub>.

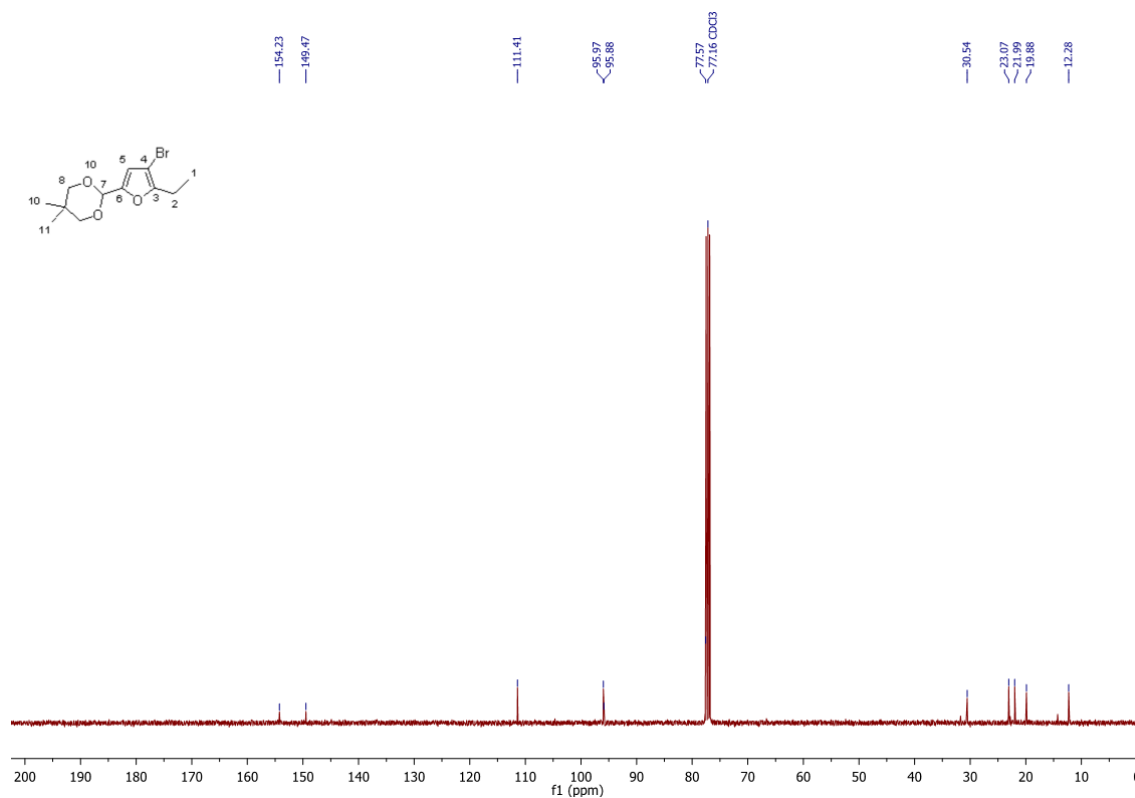

**Figure S8.** <sup>13</sup>C NMR spectrum of 2-(4-bromo-5-ethylfuran-2-yl)-5,5-dimethyl-1,3-dioxane in CDCl<sub>3</sub>.



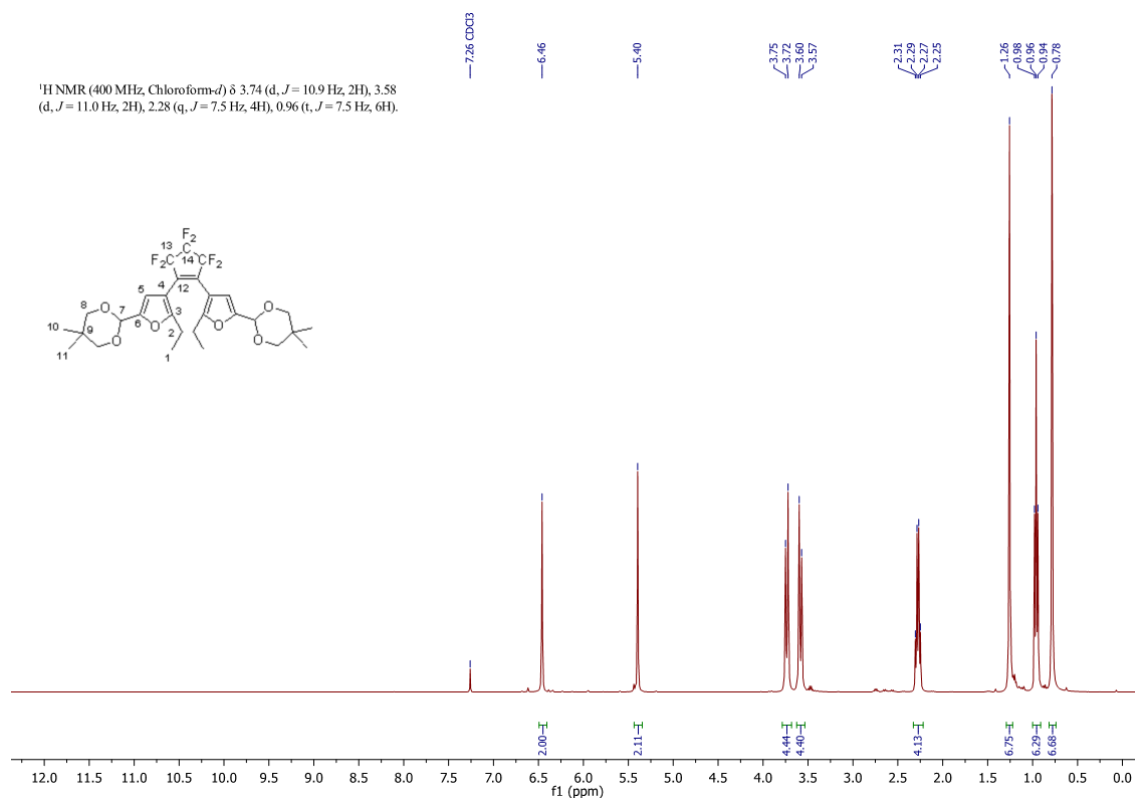

**Figure S9.** <sup>1</sup>H NMR spectrum of C5F-Et-NPA in CDCl<sub>3</sub>.

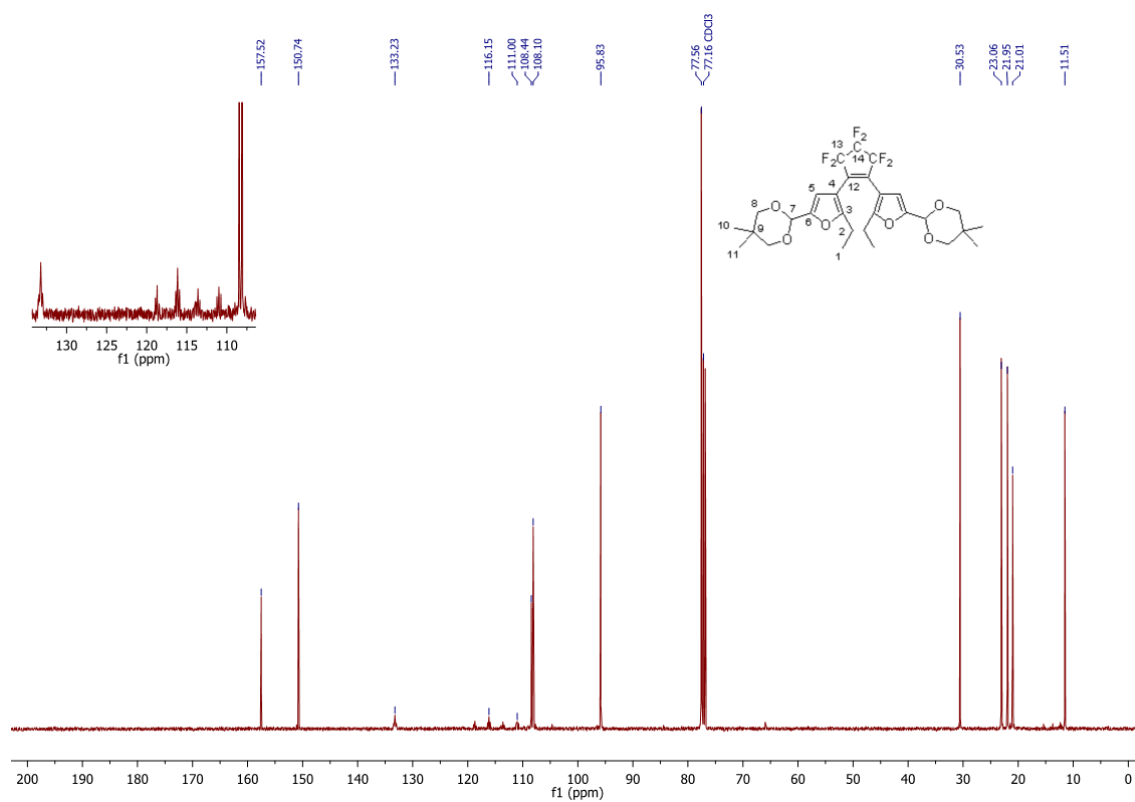

**Figure S10.** <sup>13</sup>C NMR spectrum of C5F-Et-NPA in CDCl<sub>3</sub>.

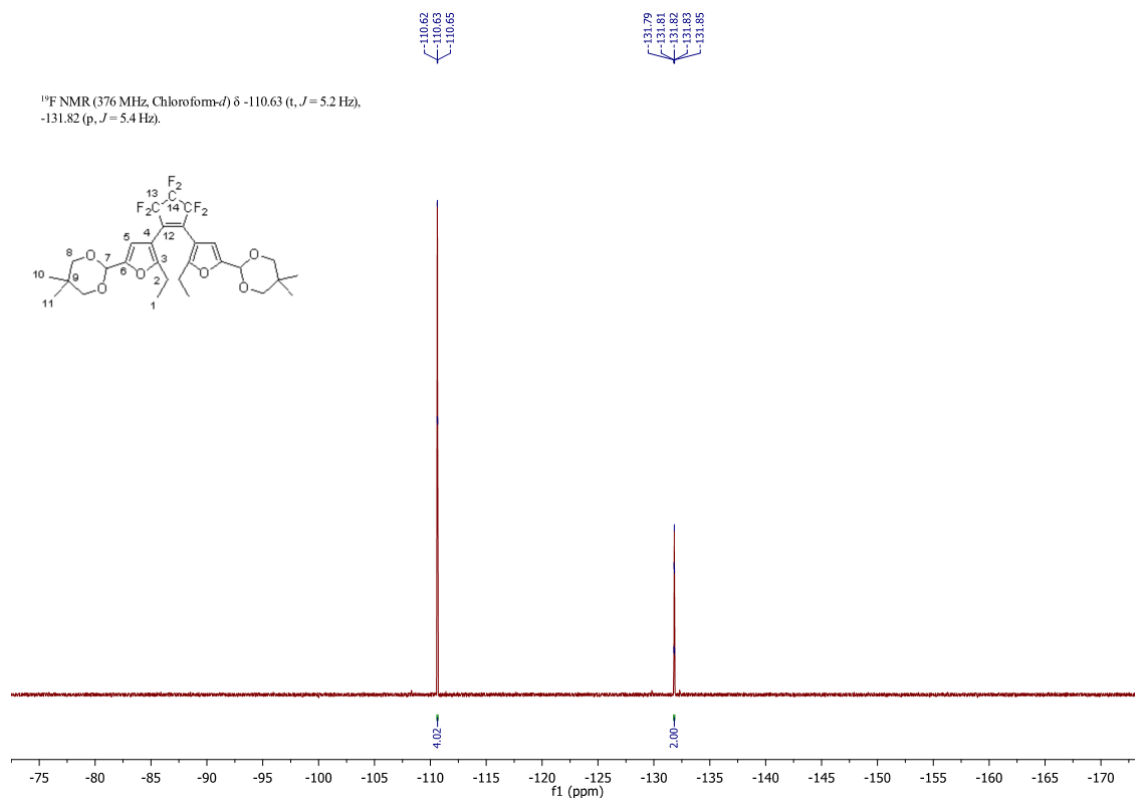

**Figure S11.** <sup>19</sup>F NMR spectrum of C5F-Et-NPA in CDCl<sub>3</sub>.

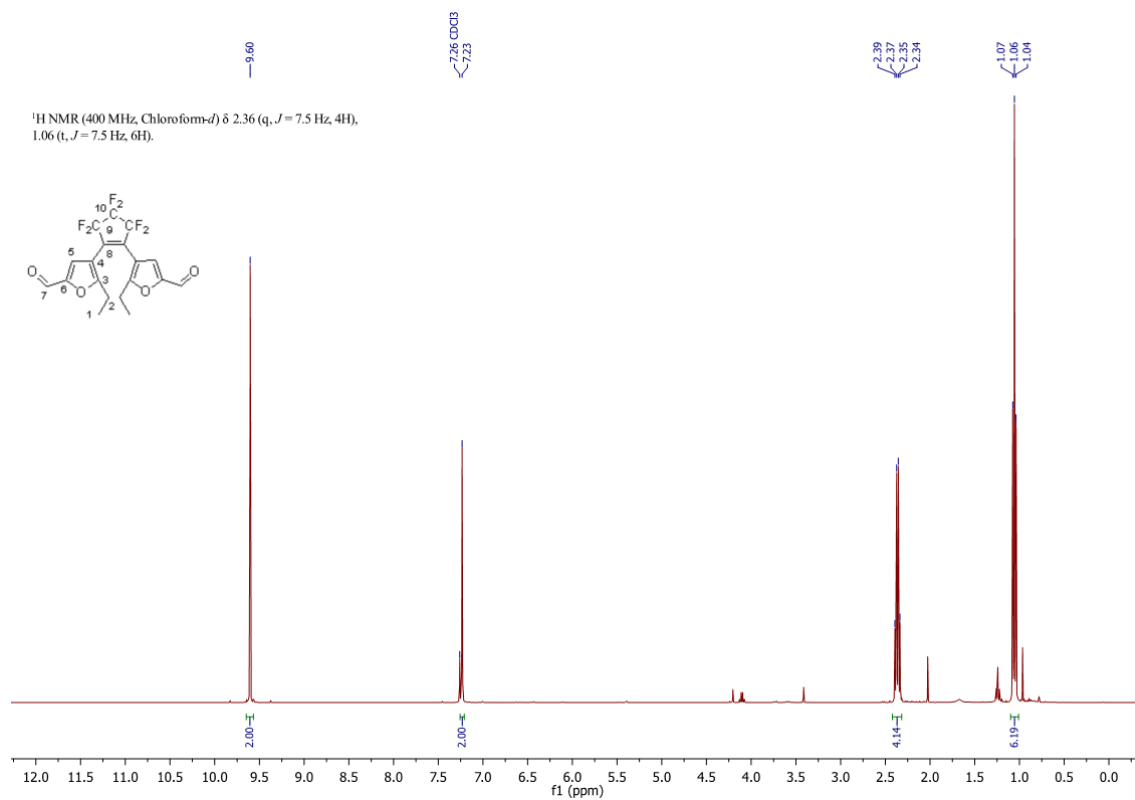

**Figure S12.** <sup>1</sup>H NMR spectrum of C5F-Et-CHO (11) in CDCl<sub>3</sub>.

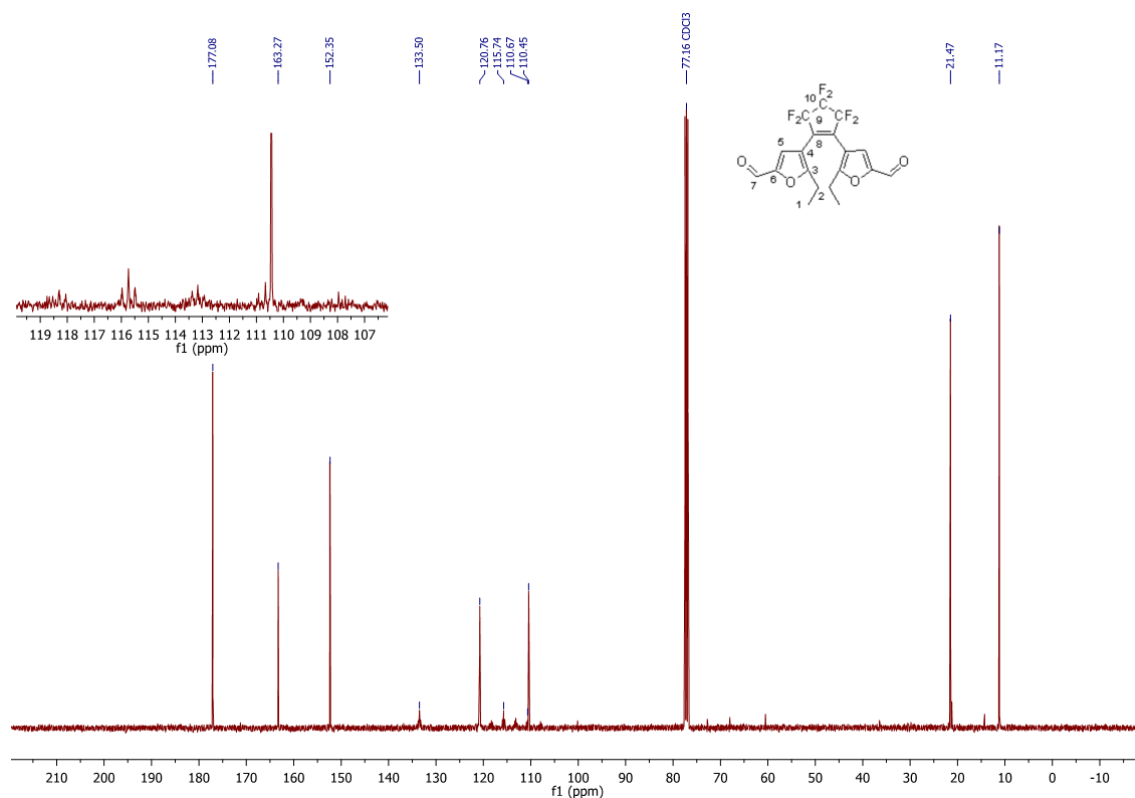

**Figure S13.**  $^{13}\text{C}$  NMR spectrum of C5F-Et-CHO (11) in  $\text{CDCl}_3$ .

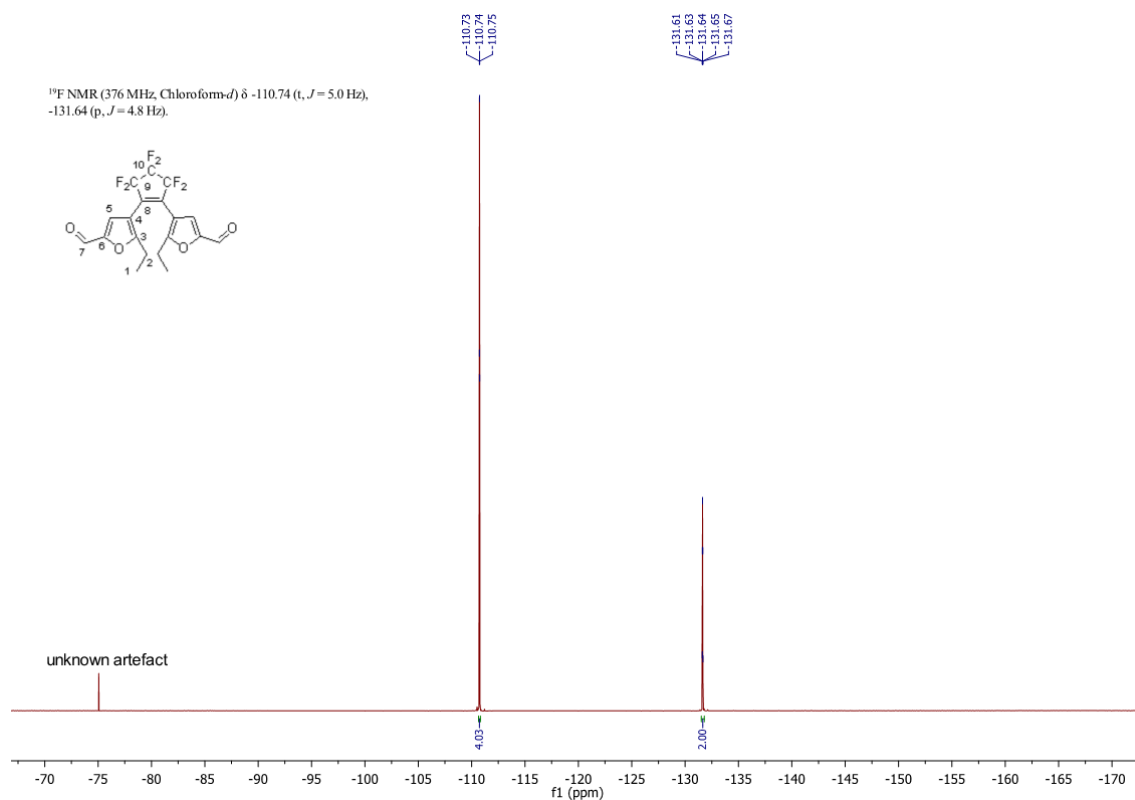

**Figure S14.**  $^{19}\text{F}$  NMR spectrum of C5F-Et-CHO (11) in  $\text{CDCl}_3$ .

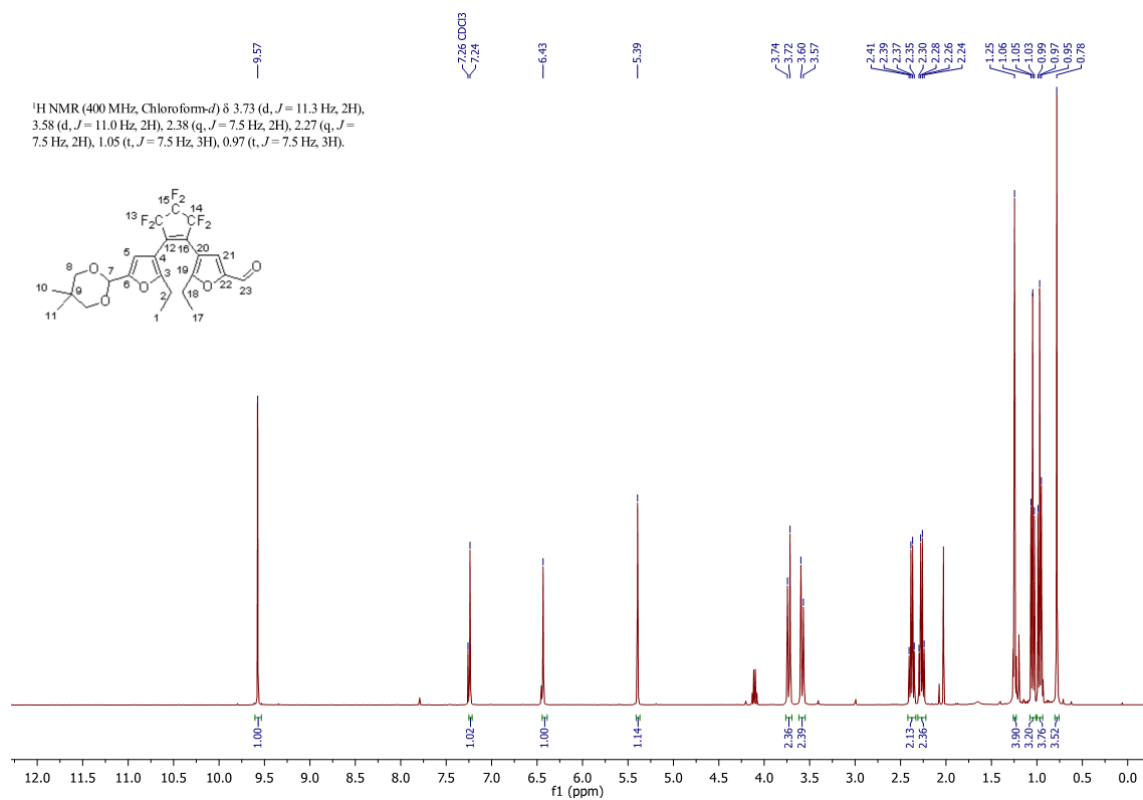

Figure S15. <sup>1</sup>H NMR spectrum of C5F-Et-NPA-CHO in CDCl<sub>3</sub>.

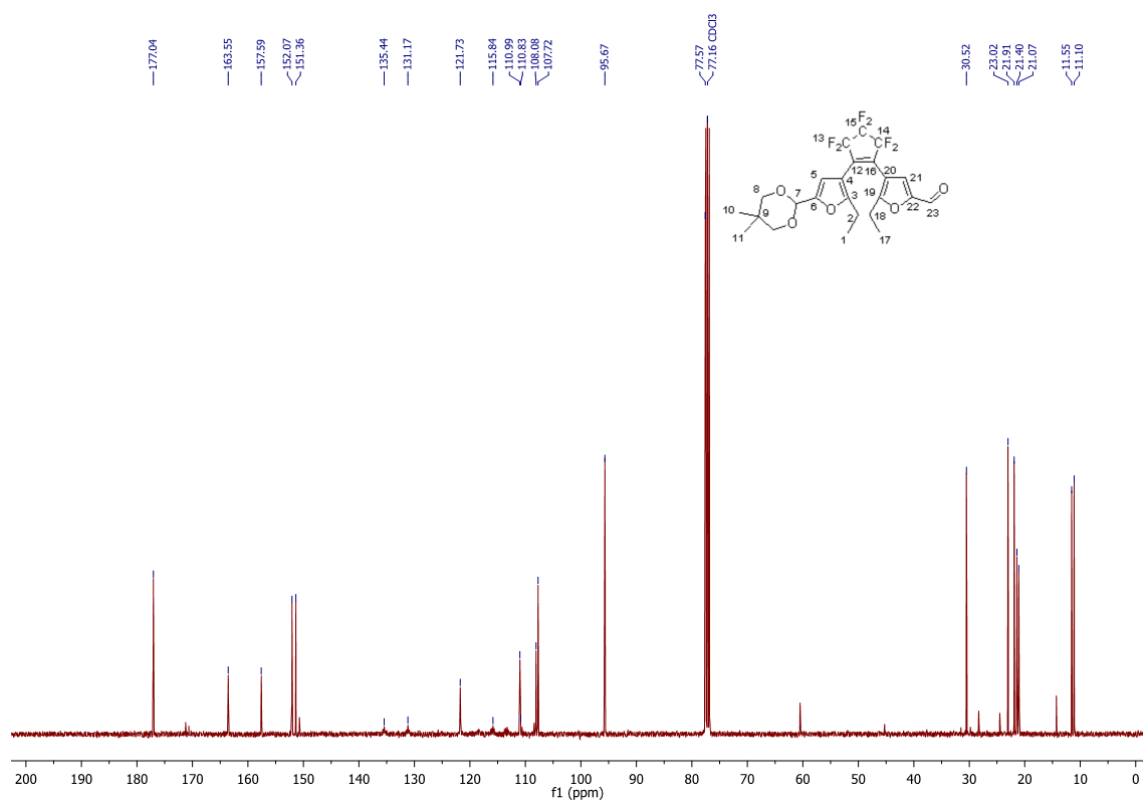

Figure S16. <sup>13</sup>C NMR spectrum of C5F-Et-NPA-CHO in CDCl<sub>3</sub>.

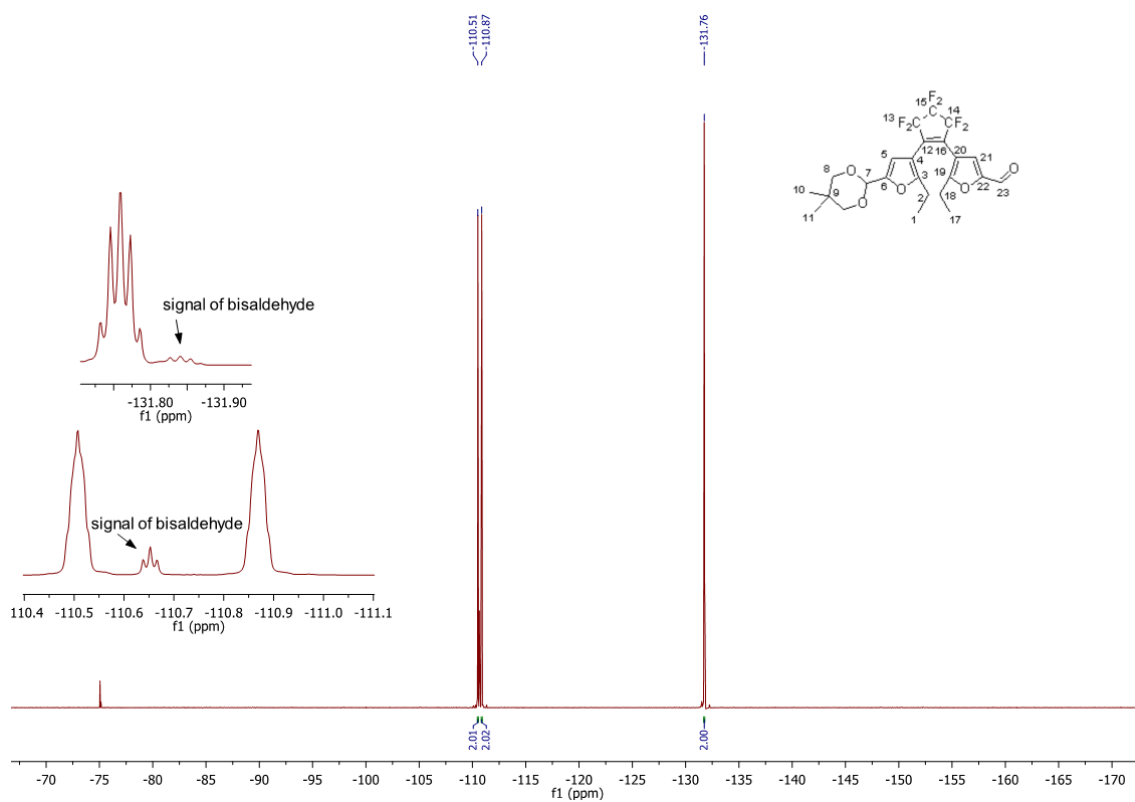

**Figure S17.**  $^{19}\text{F}$  NMR spectrum of C5F-Et-NPA-CHO in  $\text{CDCl}_3$ .

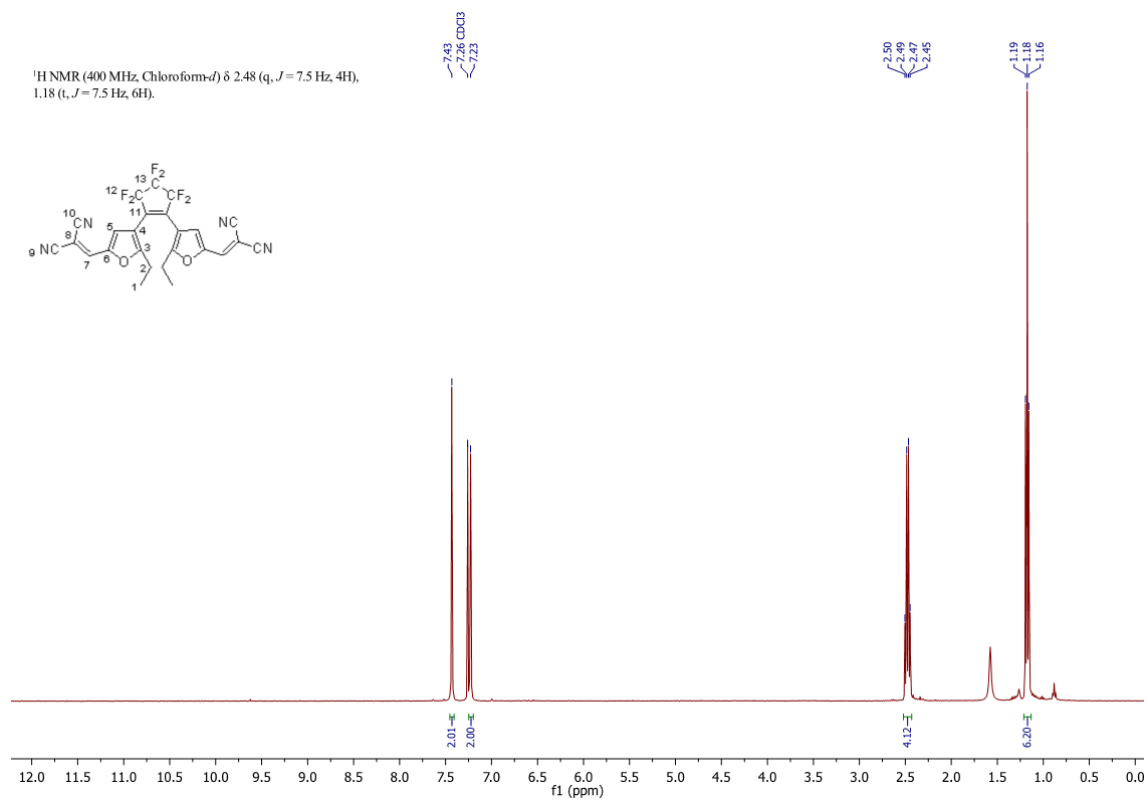

**Figure S18.**  $^1\text{H}$  NMR spectrum of C5F-Et-MN (12) in  $\text{CDCl}_3$ .

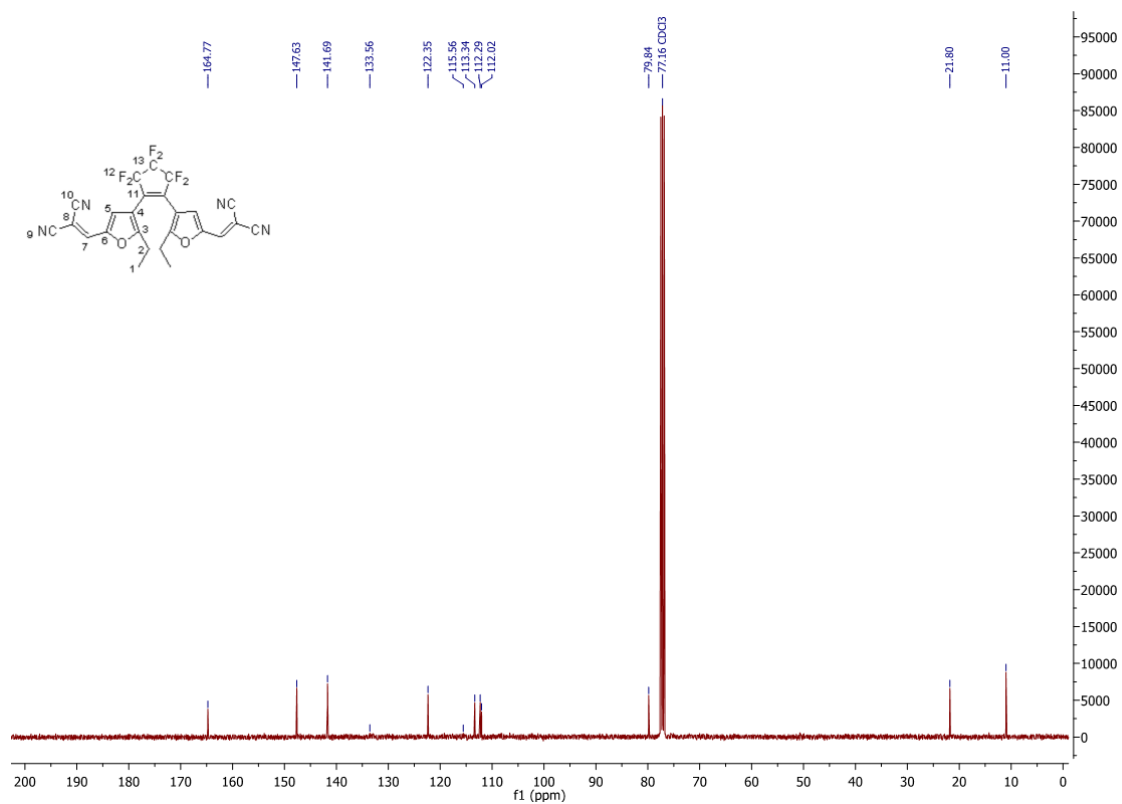

**Figure S19.**  $^{13}\text{C}$  NMR spectrum of C5F-Et-MN (**12**) in CDCl<sub>3</sub>.

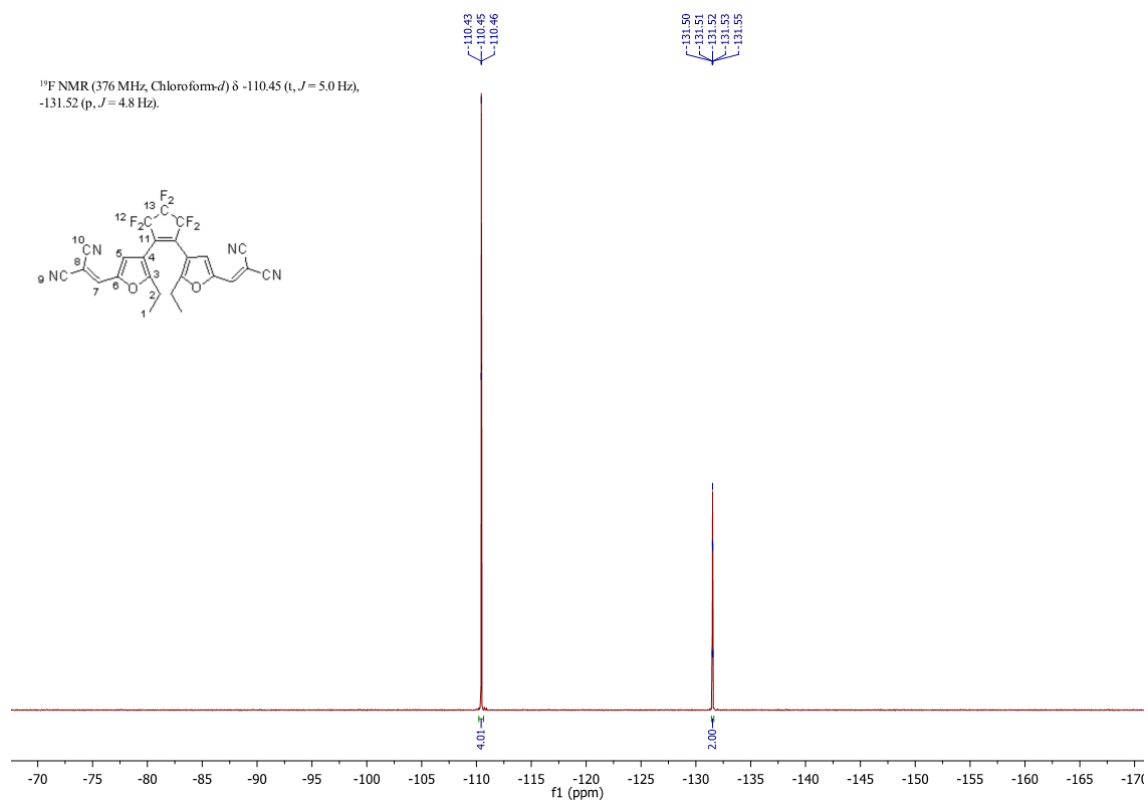

**Figure S20.**  $^{19}\text{F}$  NMR spectrum of C5F-Et-MN (**12**) in CDCl<sub>3</sub>.

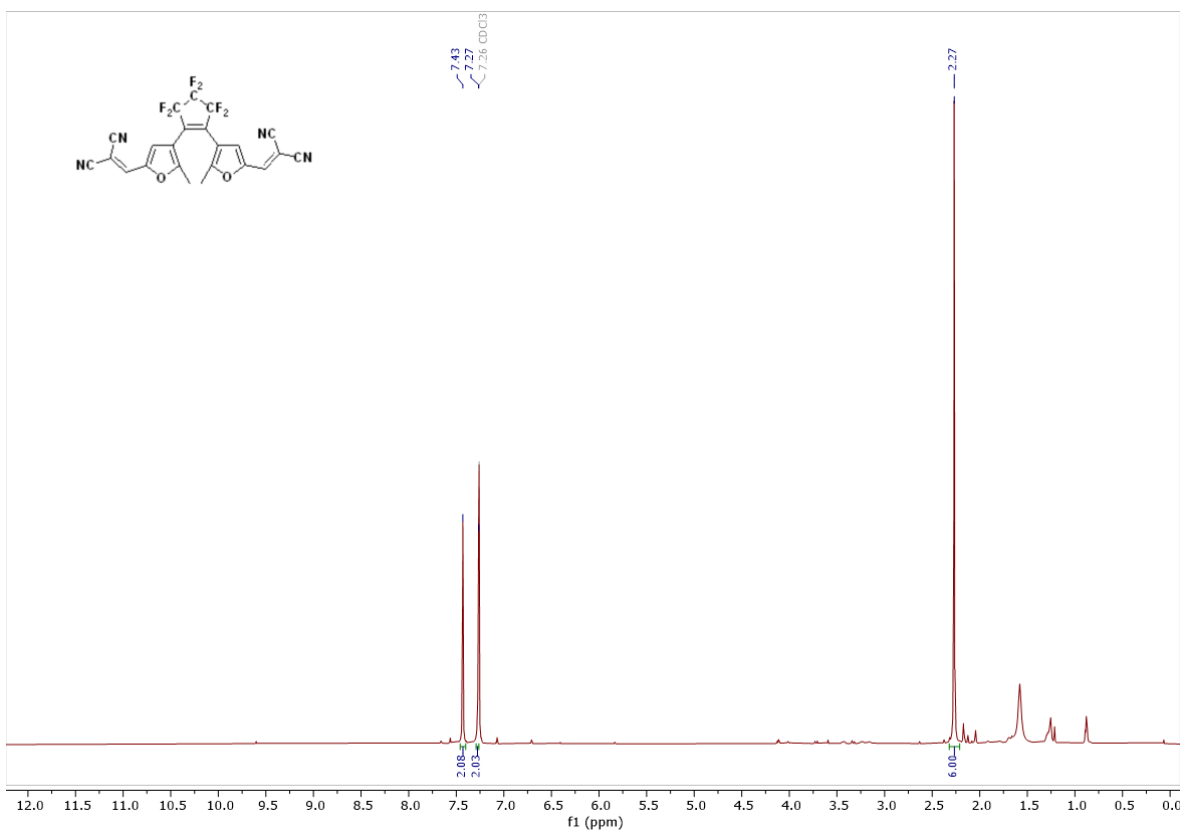

**Figure S21.** <sup>1</sup>H NMR spectrum of C5F-MN (7) in CDCl<sub>3</sub>.

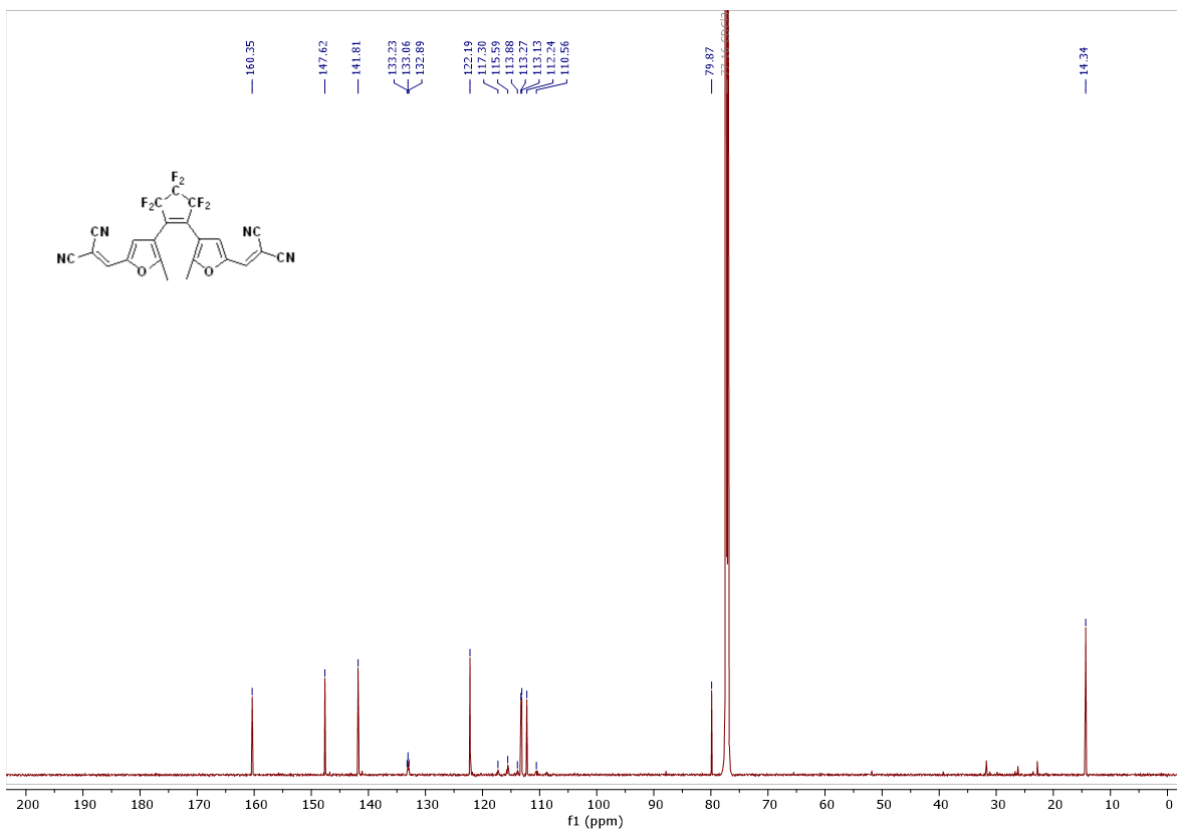

**Figure S22.** <sup>13</sup>C NMR spectrum of C5F-MN (7) in CDCl<sub>3</sub>.

$^1\text{H}$  NMR (400 MHz, Chloroform- $d_3$ )  $\delta$  2.77 (t,  $J = 7.5$  Hz, 4H),  
2.09 (p,  $J = 7.6$  Hz, 2H).

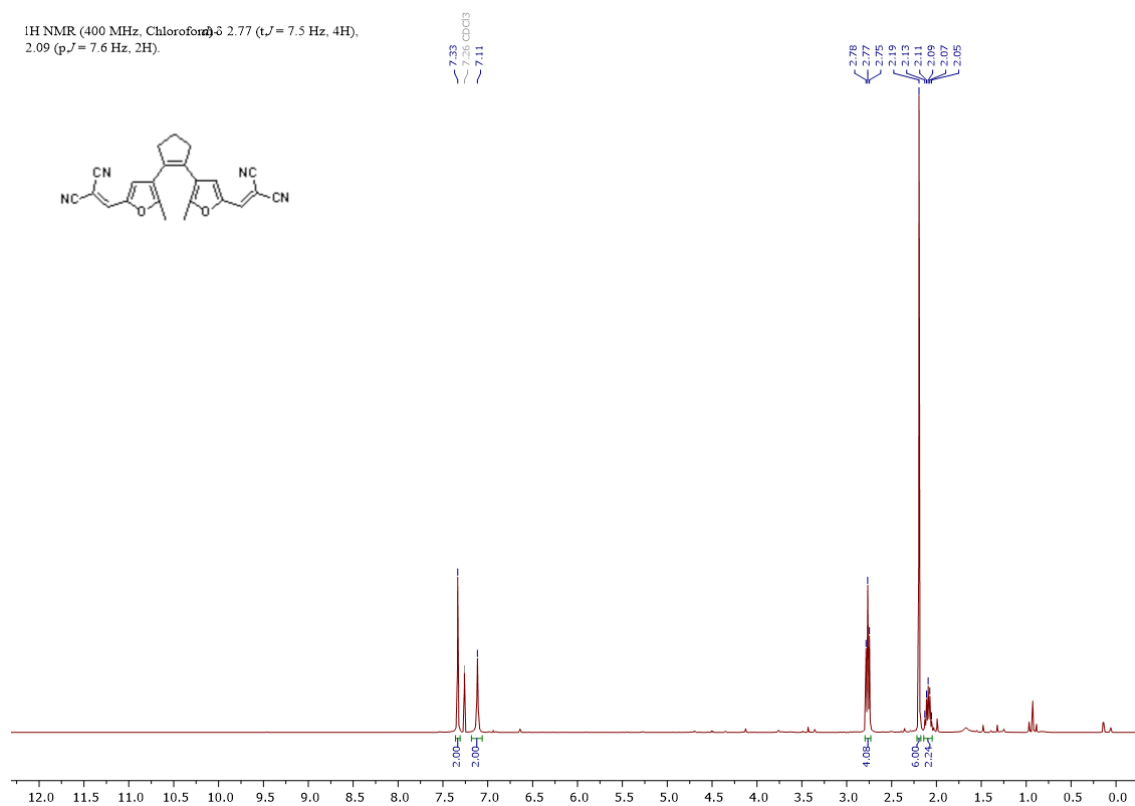

Figure S23.  $^1\text{H}$  NMR spectrum of C5H-MN (14) in  $\text{CDCl}_3$ .

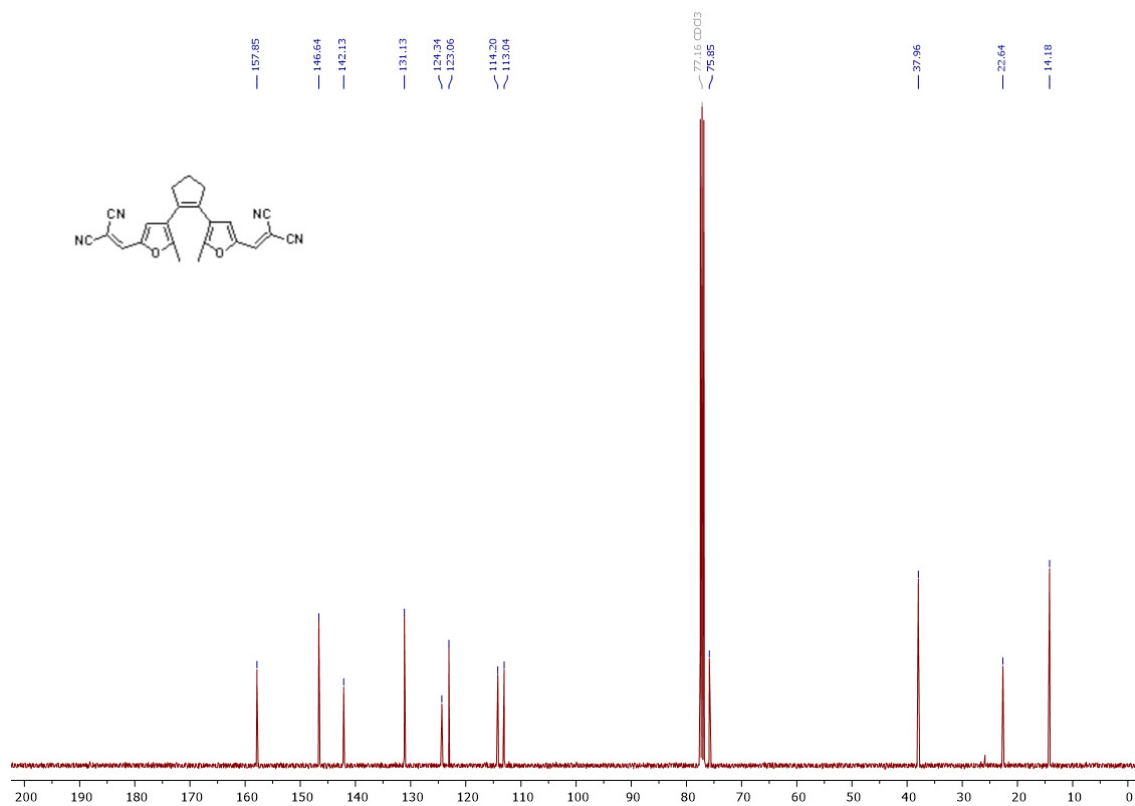

Figure S24.  $^{13}\text{C}$  NMR spectrum of C5H-MN (14) in  $\text{CDCl}_3$ .



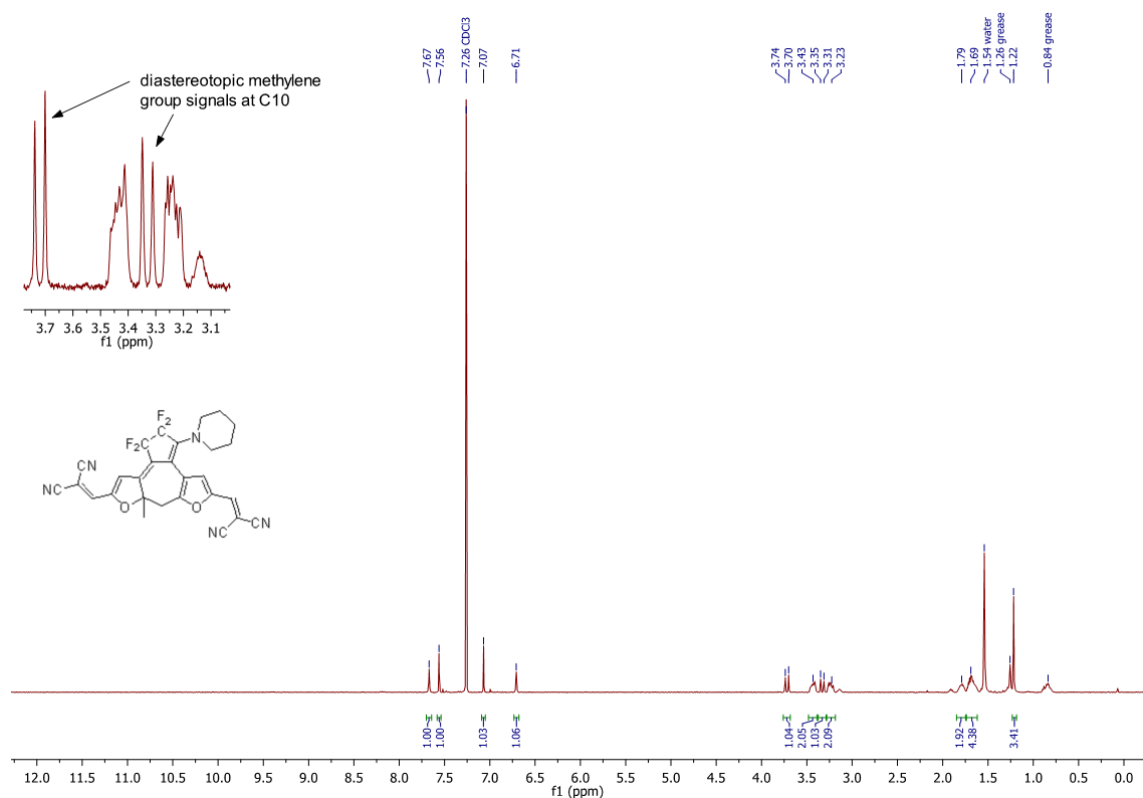

**Figure S25.** <sup>1</sup>H NMR spectrum of 7-MN-pip (**8a**) in CDCl<sub>3</sub>.

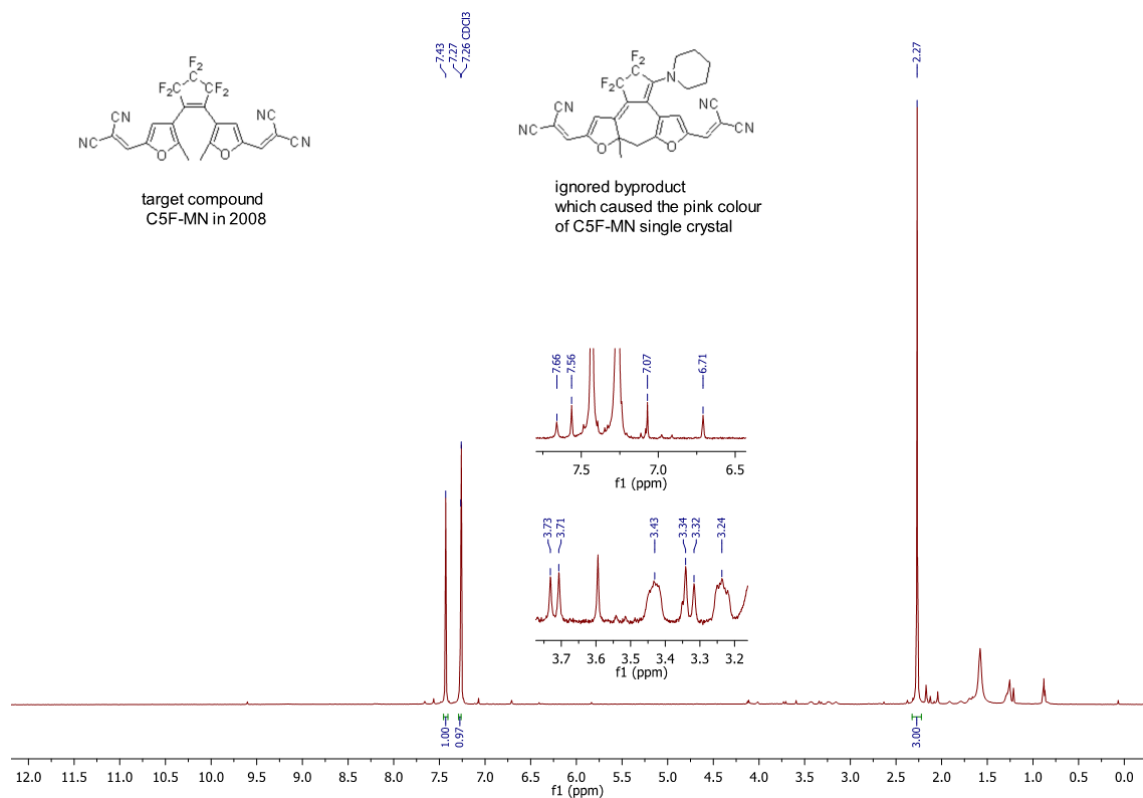

**Figure S26.** <sup>1</sup>H NMR spectrum of C5F-MN (**7**) in CDCl<sub>3</sub> contaminated with trace amounts of byproduct 7-MN-pip (**8a**) from ref [2].

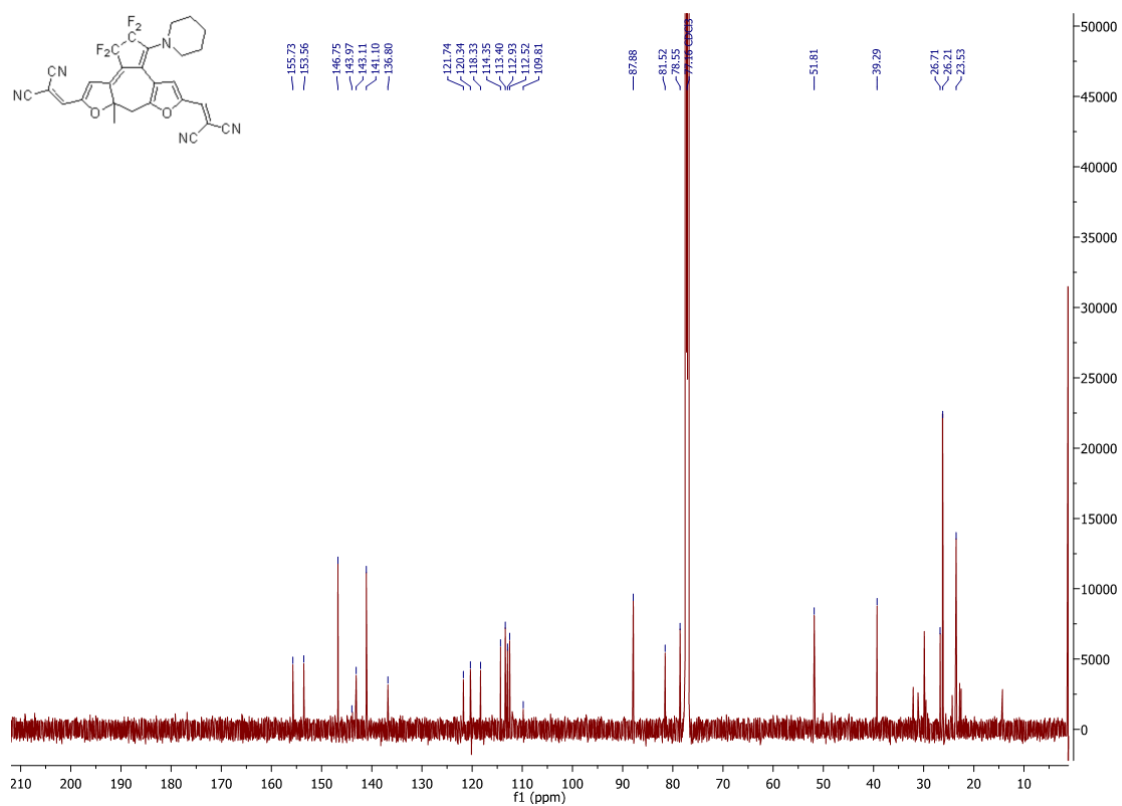

Figure S27. <sup>13</sup>C NMR spectrum of 7-MN-pip (**8a**) in CDCl<sub>3</sub>.

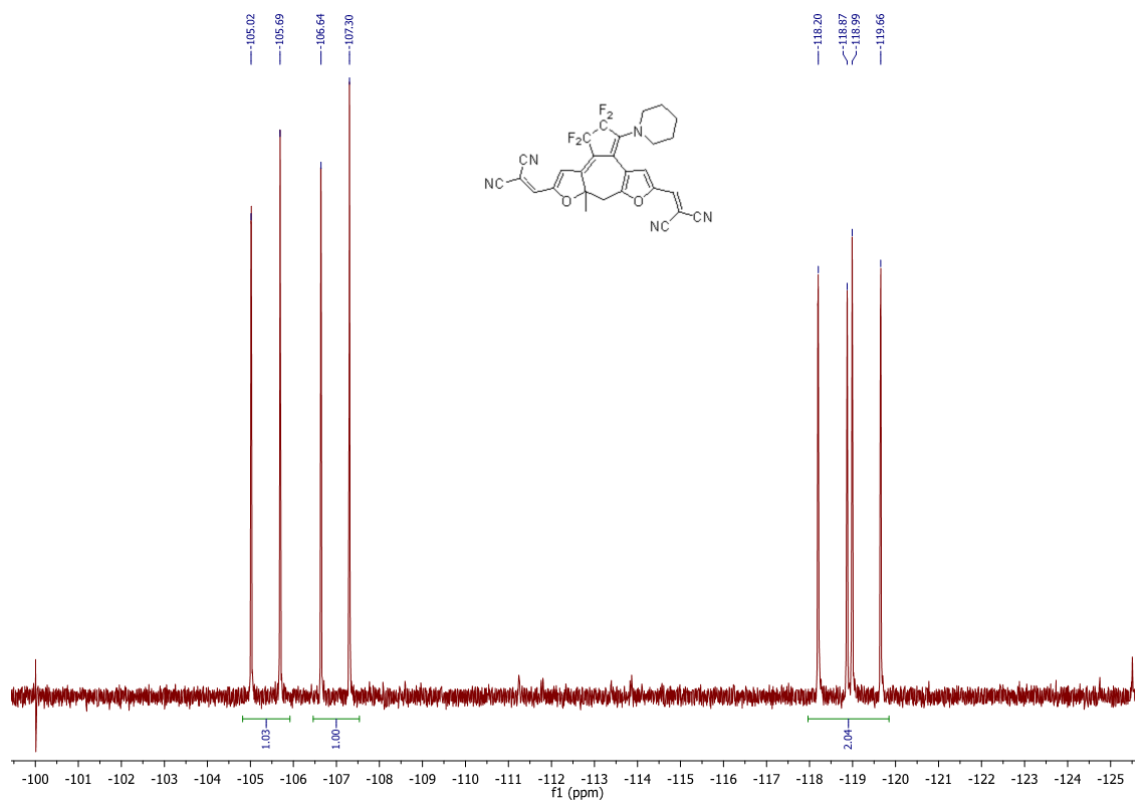

Figure S28. <sup>19</sup>F NMR spectrum of 7-MN-pip (**8a**) in CDCl<sub>3</sub>.

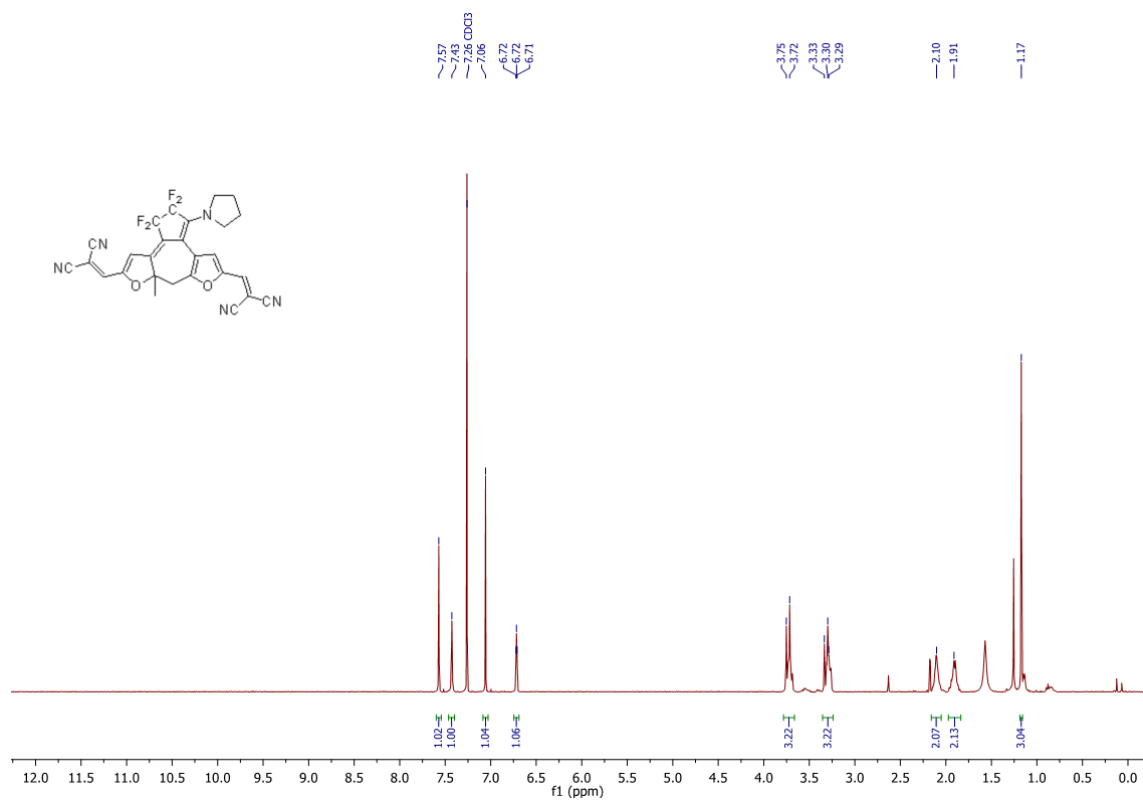

**Figure S29.** <sup>1</sup>H NMR spectrum of 7-MN-pyrr (**8b**) in CDCl<sub>3</sub>.

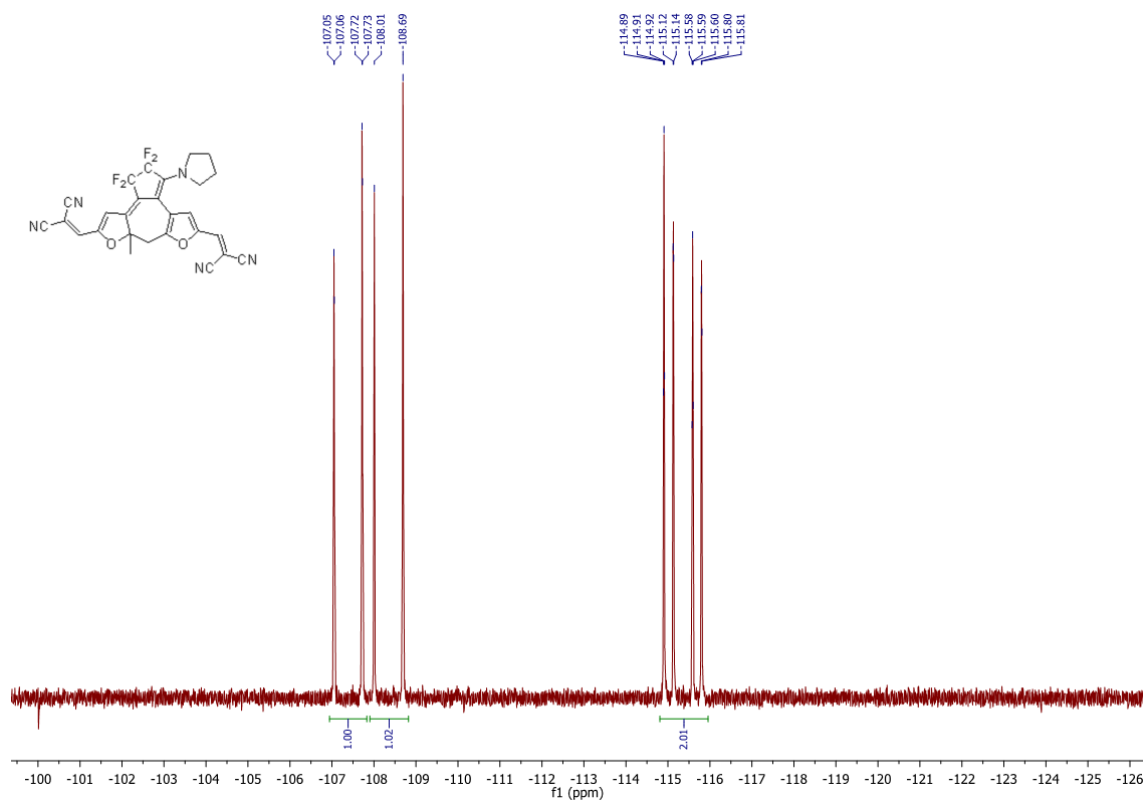

**Figure S30.** <sup>19</sup>F NMR spectrum of 7-MN-pyrr (**8b**) in CDCl<sub>3</sub>.

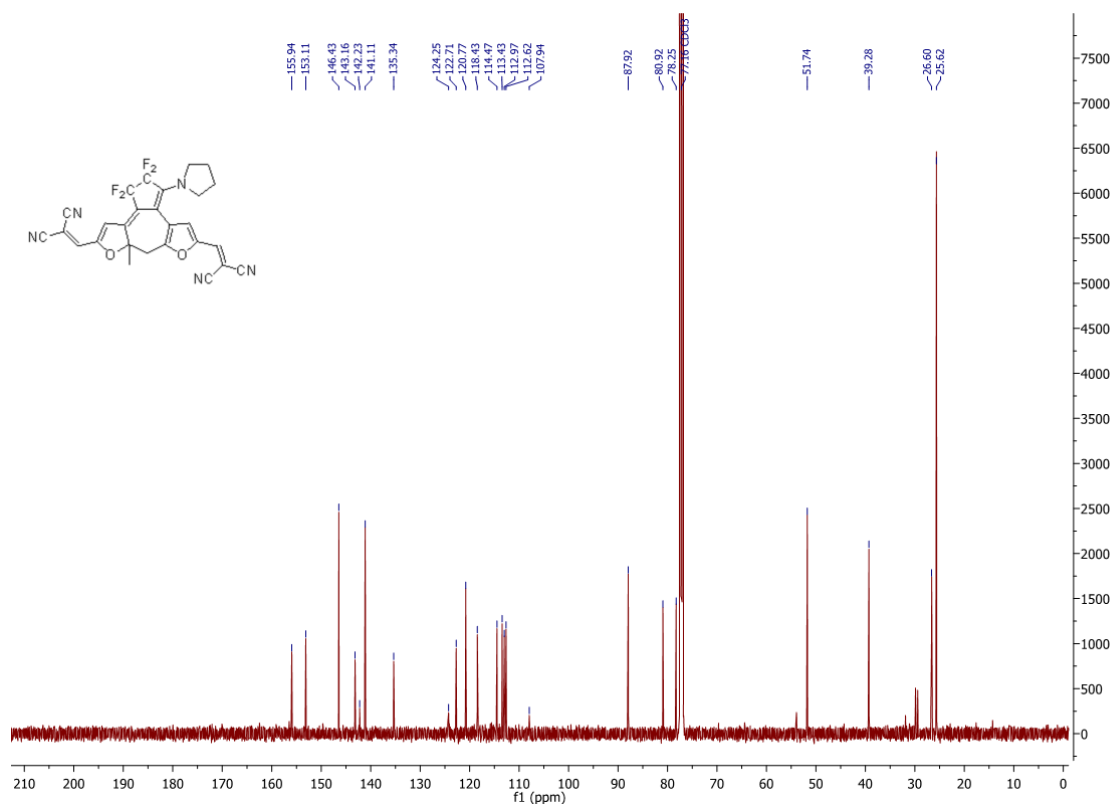

**Figure S31.**  $^{13}\text{C}$  NMR spectrum of 7-MN-pyrr (**8b**) in  $\text{CDCl}_3$ .

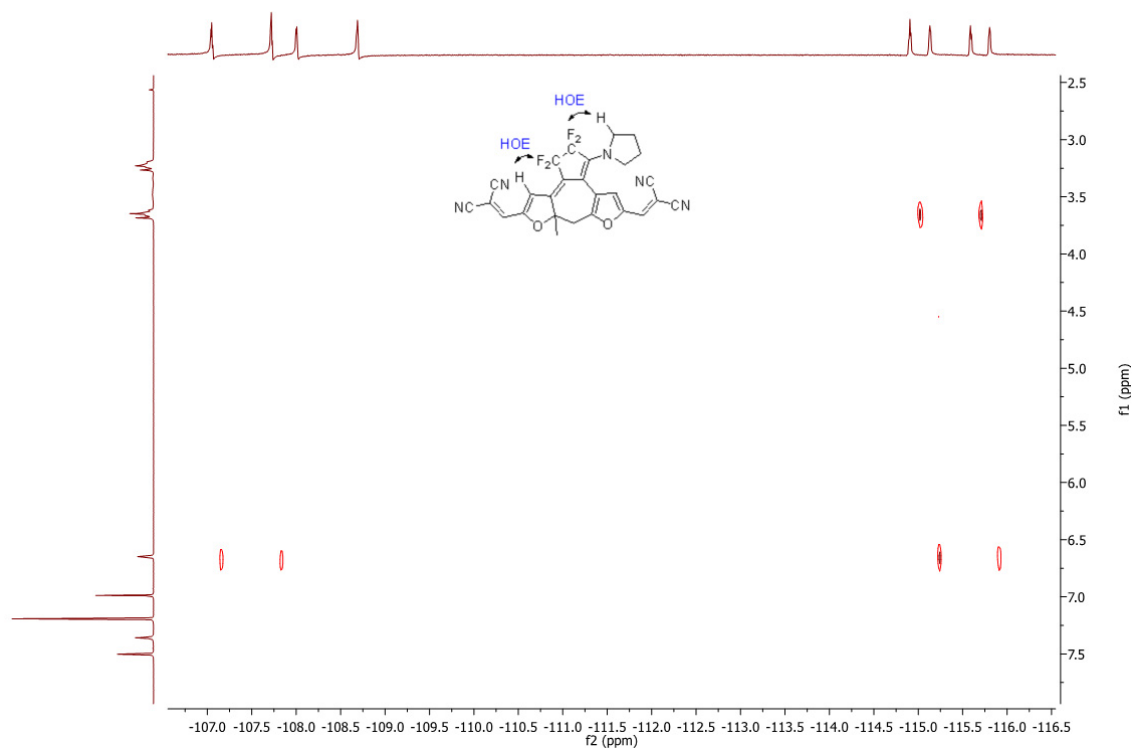

**Figure S32.**  $\{^1\text{H}, ^{19}\text{F}\}$ -HOESY spectrum of 7-MN-pyrr (**8b**) in  $\text{CDCl}_3$ .

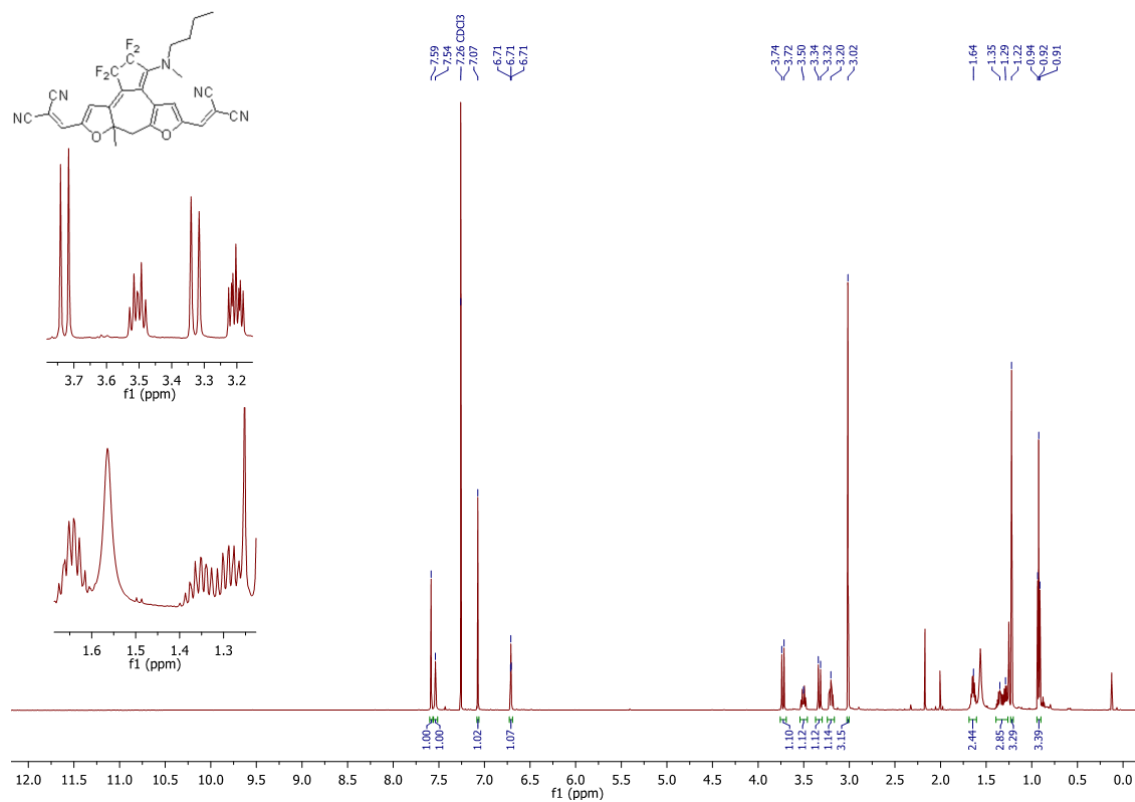

**Figure S33.**  $^1\text{H}$  NMR spectrum of 7-MN-mebu (**8c**) in  $\text{CDCl}_3$ .

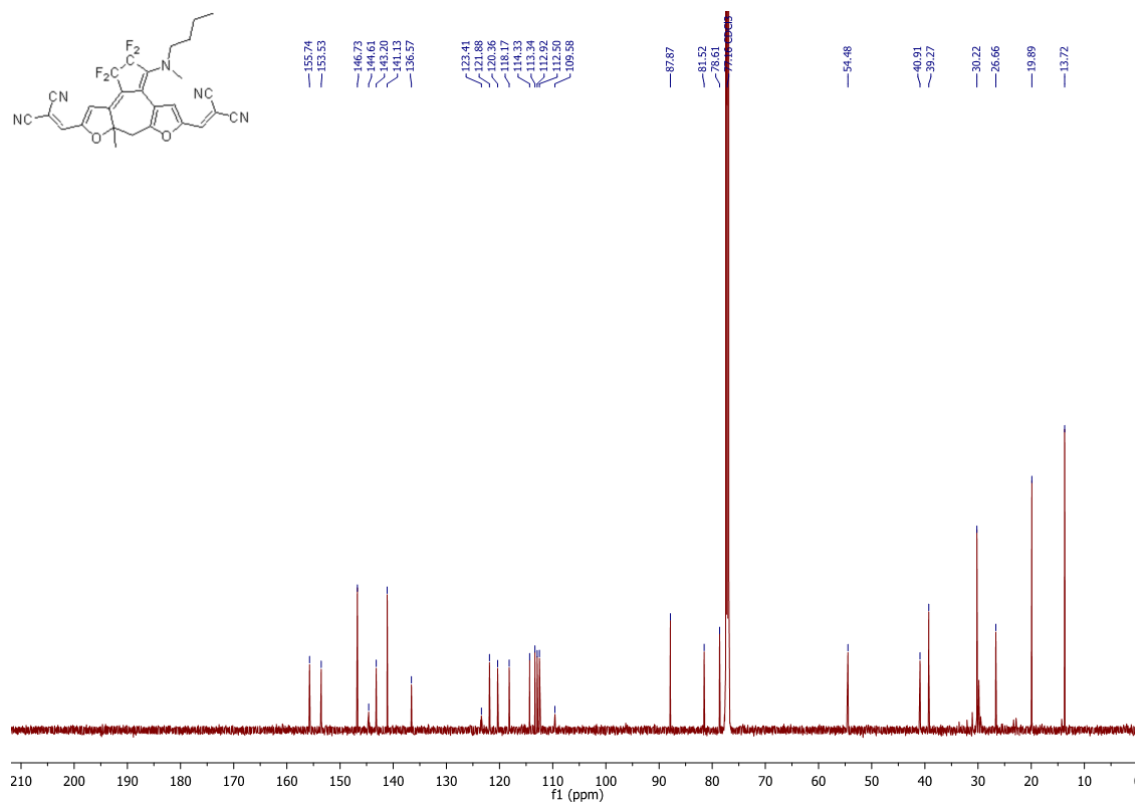

**Figure S34.**  $^{13}\text{C}$  NMR spectrum of 7-MN-mebu (**8c**) in  $\text{CDCl}_3$ .

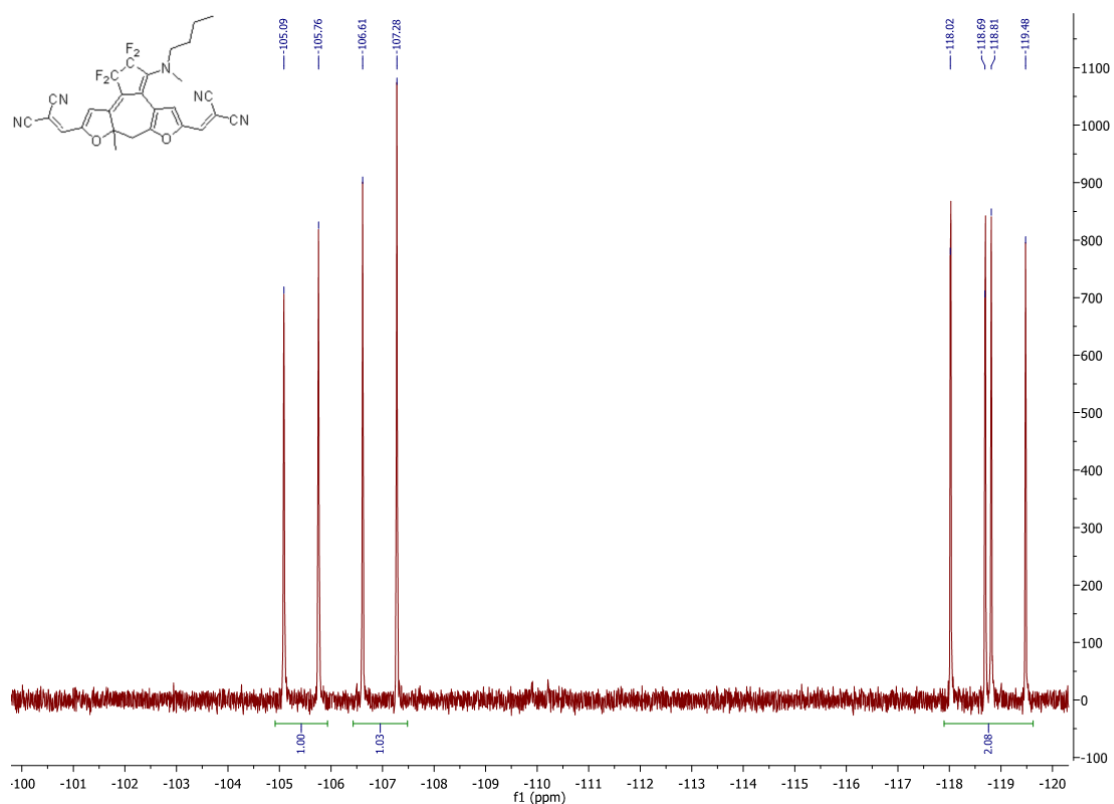

**Figure S35.**  $^{19}\text{F}$  NMR spectrum of 7-MN-mebu (**8c**) in  $\text{CDCl}_3$ .

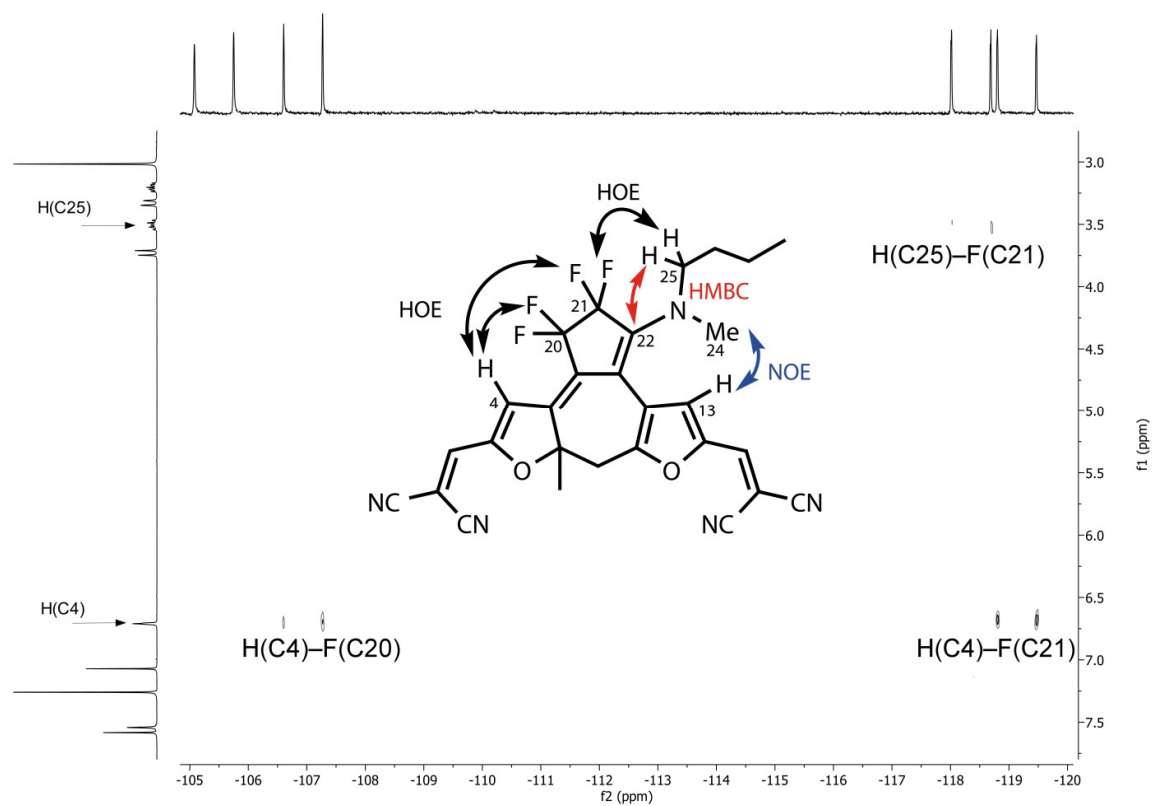

**Figure S36.**  $\{^1\text{H}, ^{19}\text{F}\}$ -HOESY spectrum of 7-MN-mebu (**8c**) in  $\text{CDCl}_3$ . Inset shows coupling of protons and fluorine atoms of the tetrafluorocyclopentene moiety.

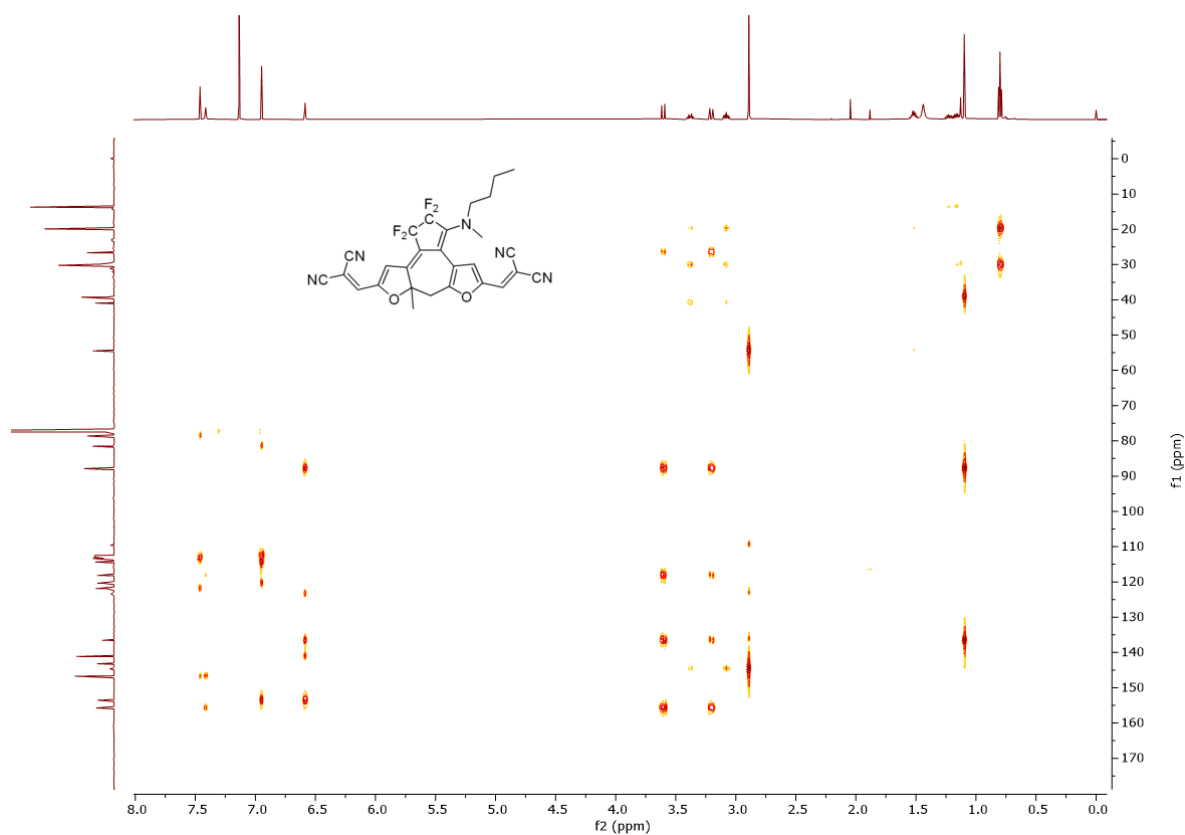

**Figure S37.** HMBC spectrum of 7-MN-mebu (**8c**) in  $\text{CDCl}_3$ .

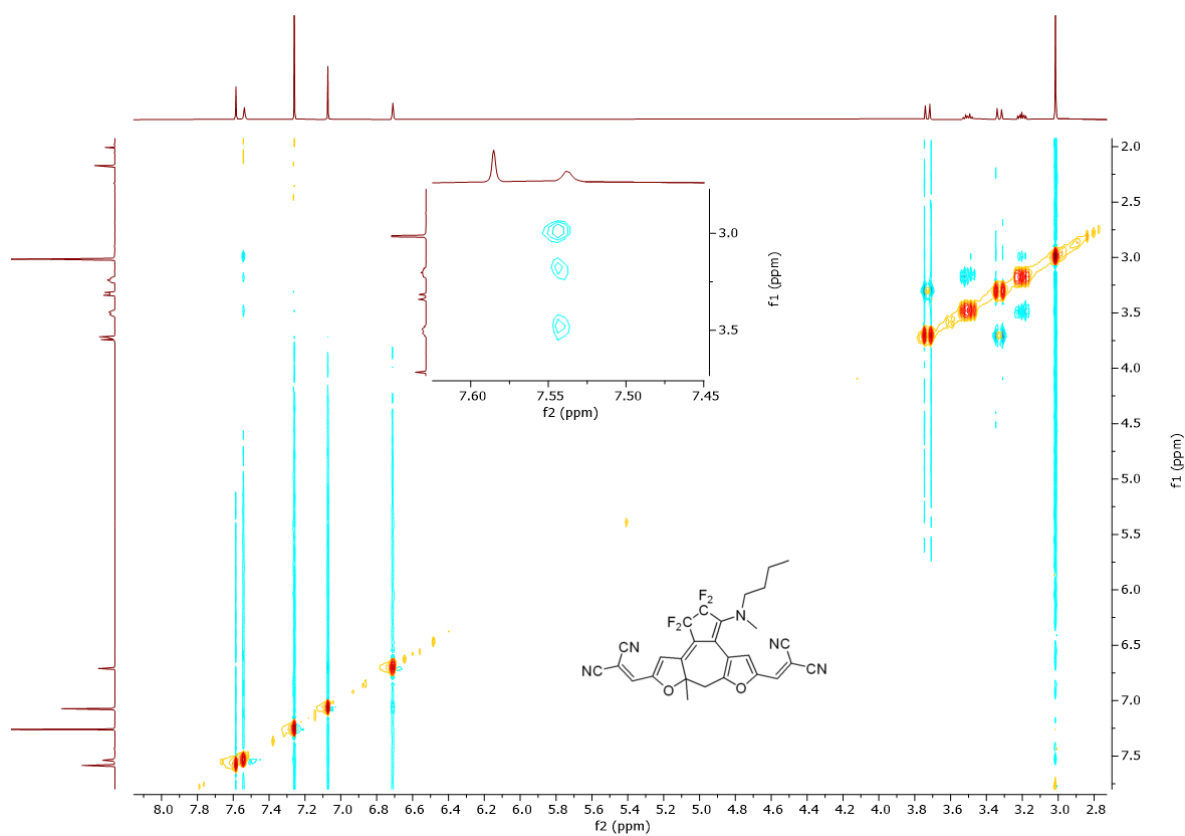

**Figure S38.** NOESY spectrum of 7-MN-mebu (**8c**) in  $\text{CDCl}_3$ .

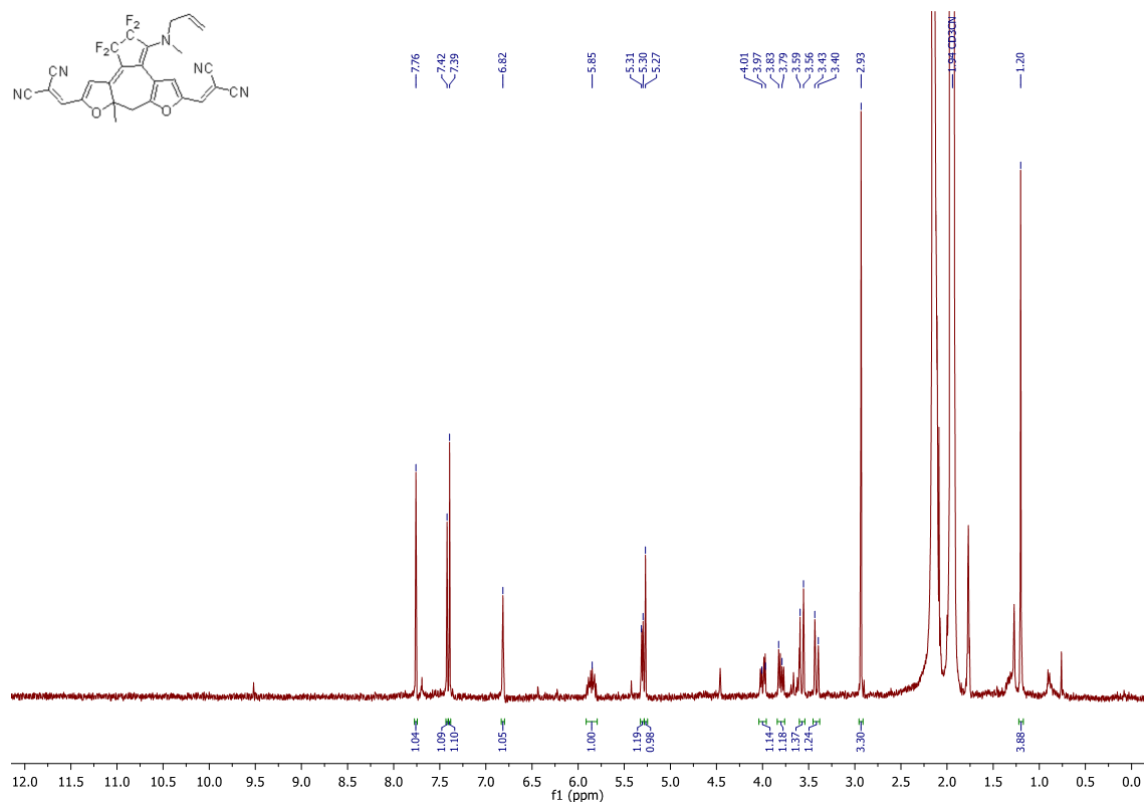

Figure S39. <sup>1</sup>H NMR spectrum of 7-MN-meall (8d) in CDCl<sub>3</sub>.

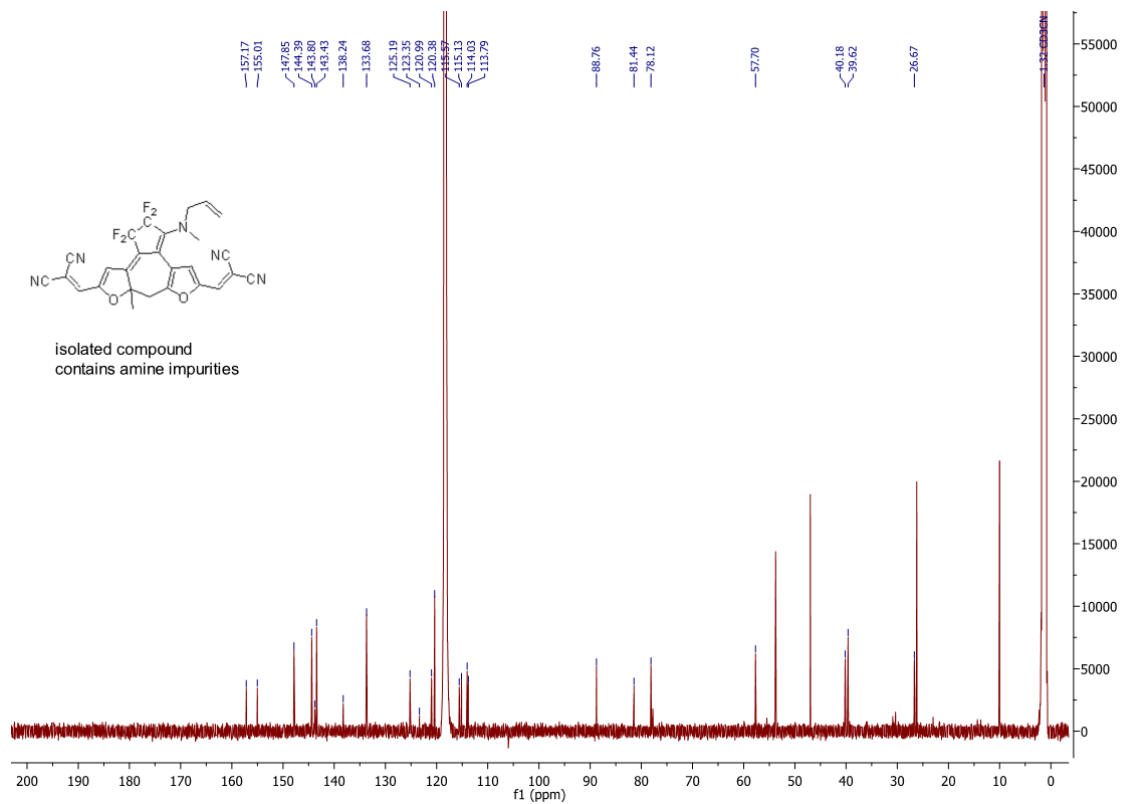

Figure S40. <sup>13</sup>C NMR spectrum of 7-MN-meall (8d) in CDCl<sub>3</sub>.



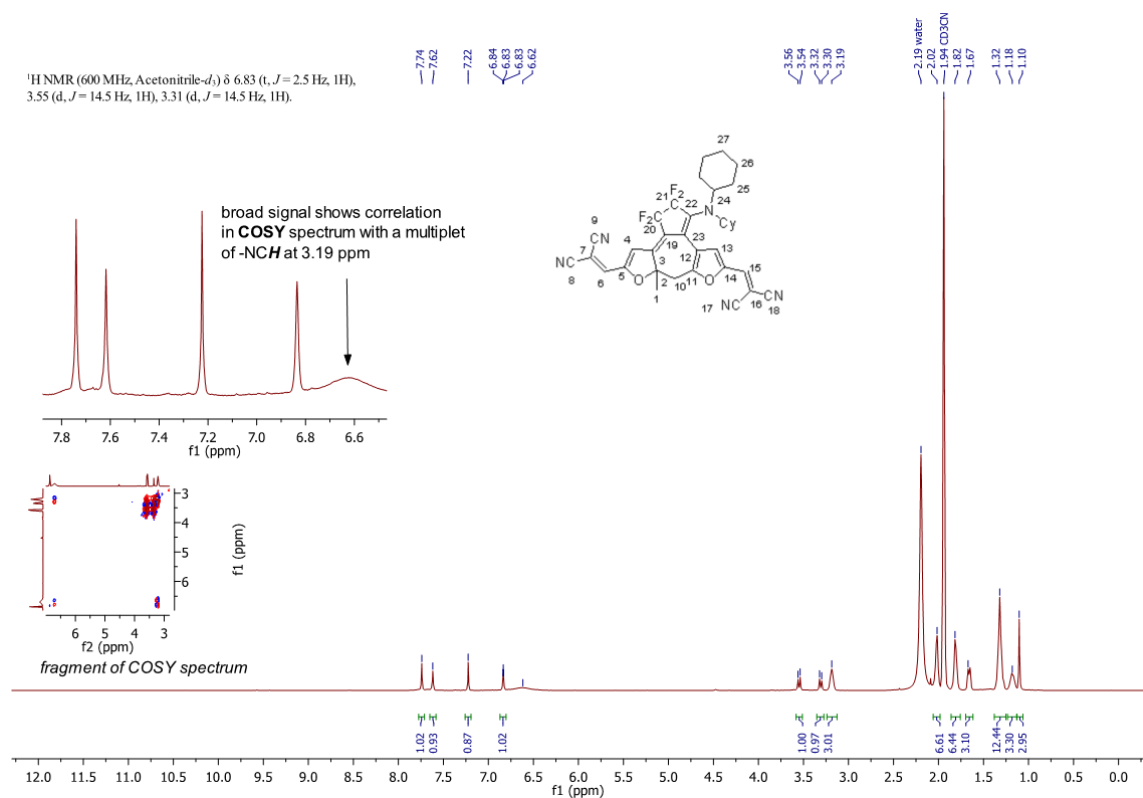

**Figure S41.** <sup>1</sup>H NMR spectrum of 7-MN-cy (**8e**) in CD<sub>3</sub>CN.

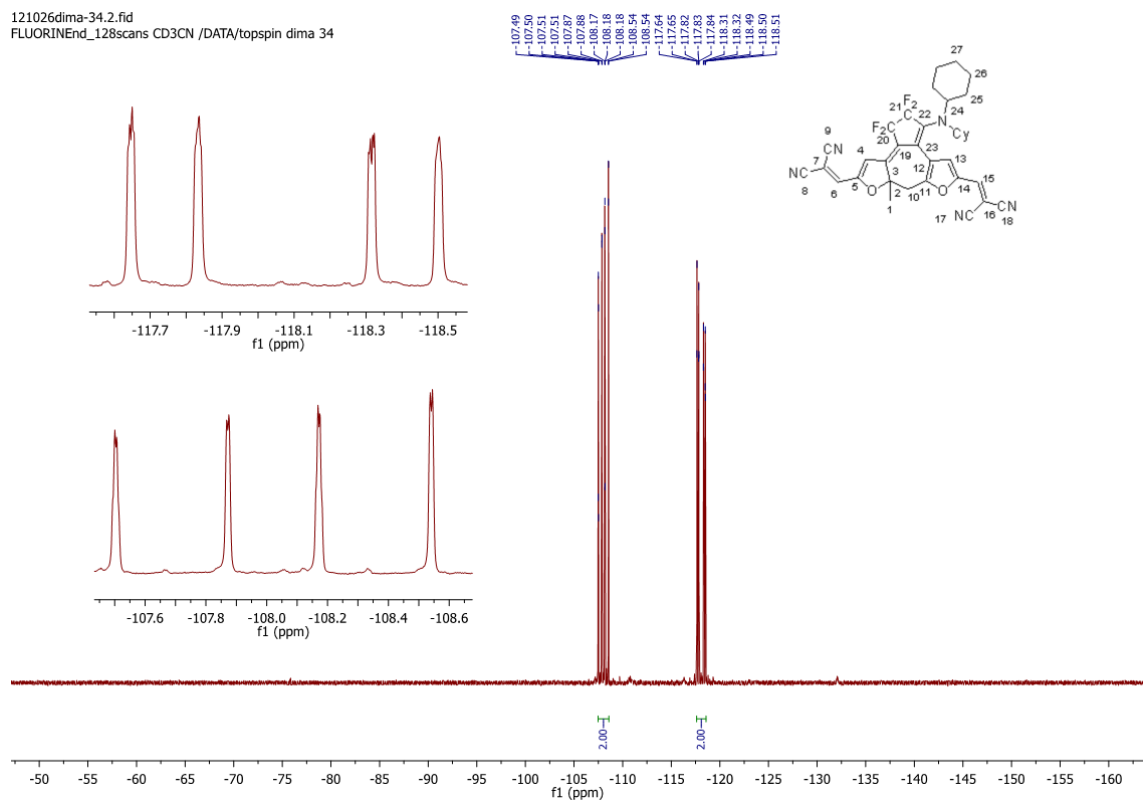

**Figure S42.** <sup>19</sup>F NMR spectrum of 7-MN-cy (**8e**) in CD<sub>3</sub>CN.

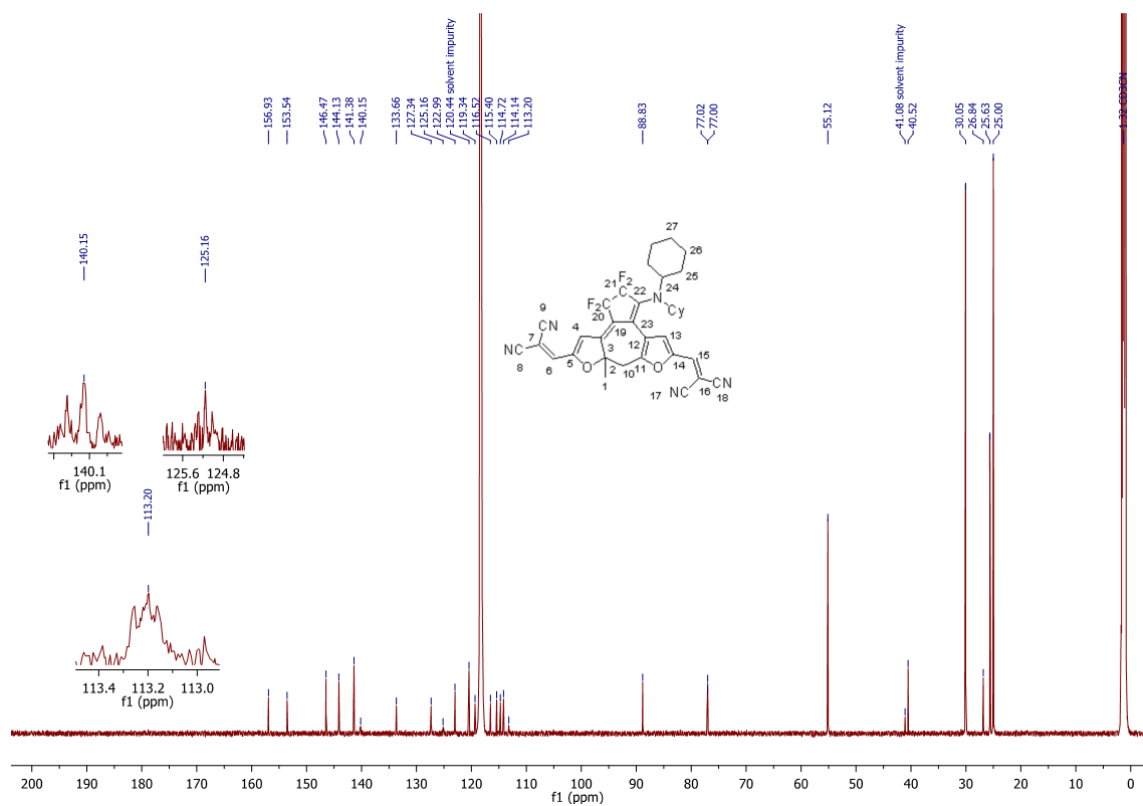

**Figure S43.**  $^{13}\text{C}$  NMR spectrum of 7-MN-cy (**8e**) in  $\text{CD}_3\text{CN}$ .

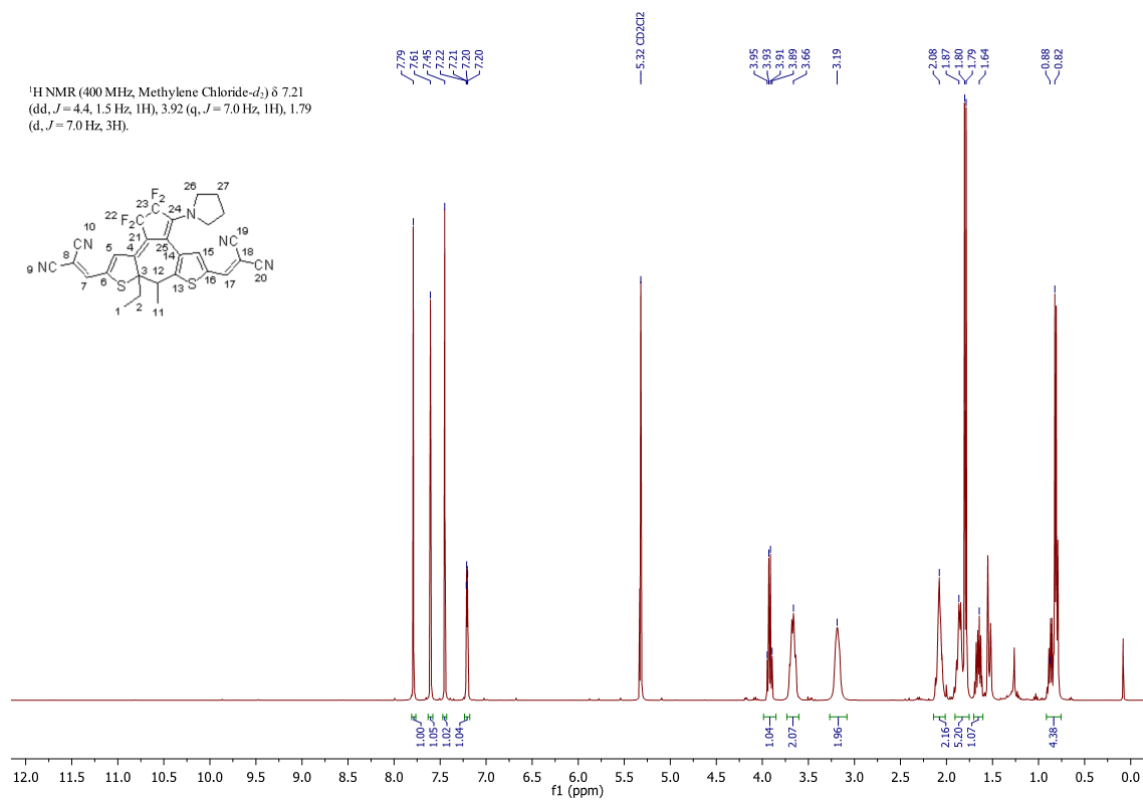

**Figure S44.**  $^1\text{H}$  NMR spectrum of 7-T-Et-MN-pyrr (**8f**) in  $\text{CD}_2\text{Cl}_2$ .

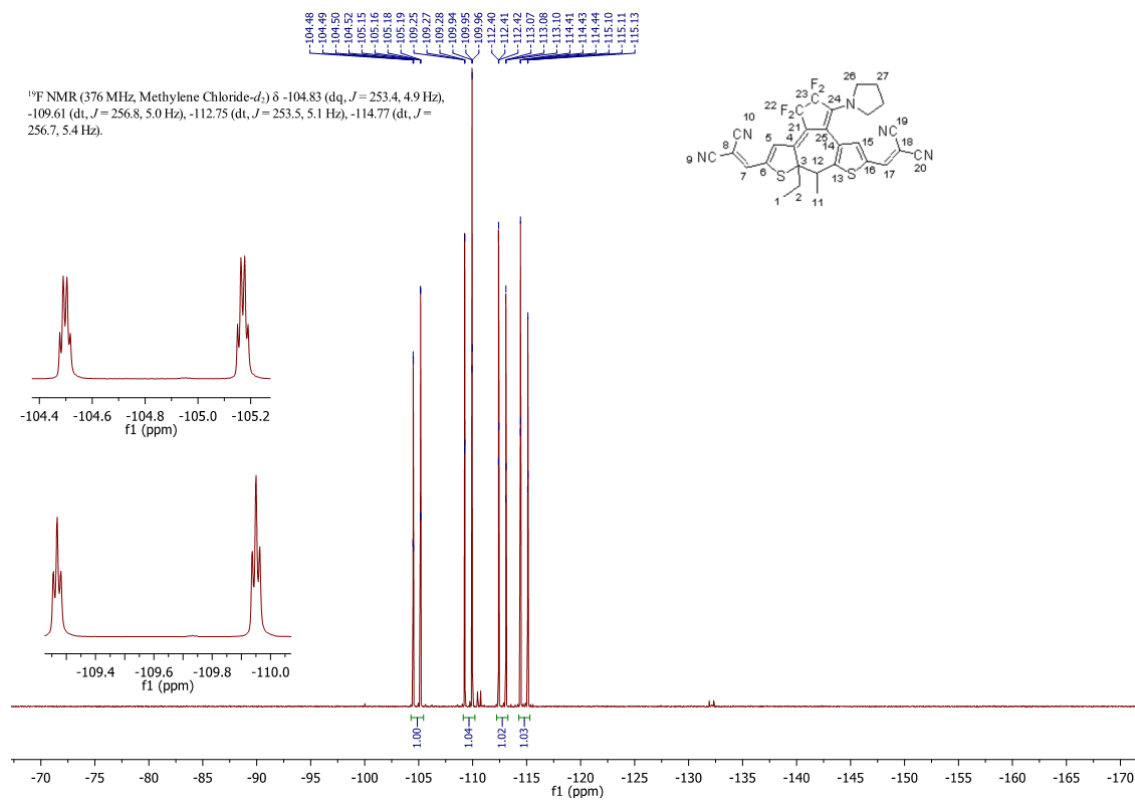

**Figure S45.** <sup>19</sup>F NMR spectrum of 7-T-Et-MN-pyrr (**8f**) in CD<sub>2</sub>Cl<sub>2</sub>.

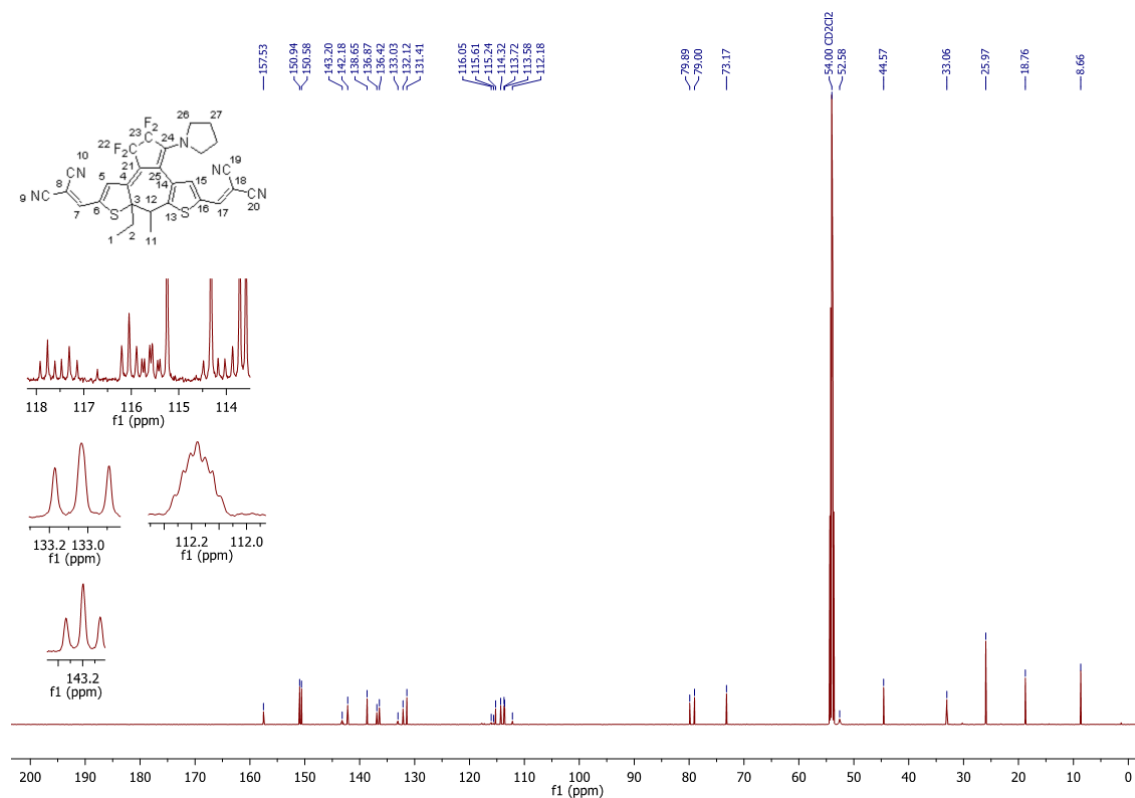

**Figure S46.** <sup>13</sup>C NMR spectrum of 7-T-Et-MN-pyrr (**8f**) in CD<sub>2</sub>Cl<sub>2</sub>.

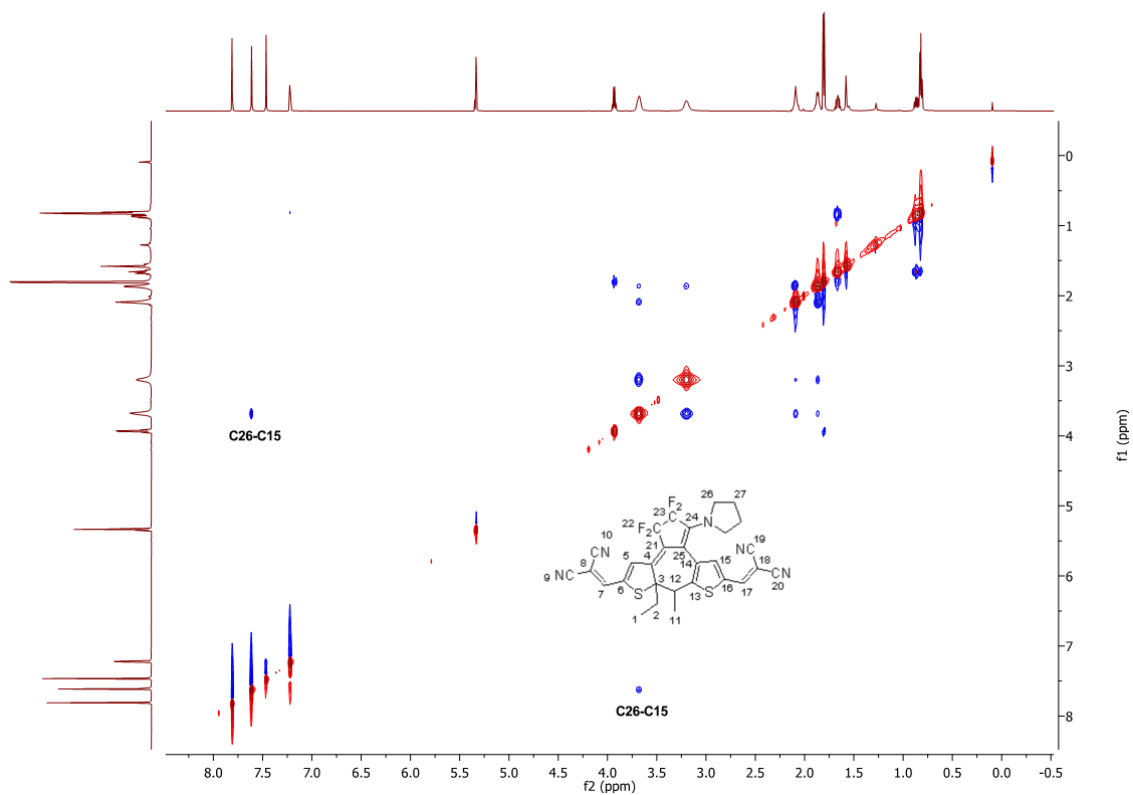

**Figure S47.** NOESY spectrum of 7-T-Et-MN-pyrr (**8f**) in  $\text{CD}_2\text{Cl}_2$ .

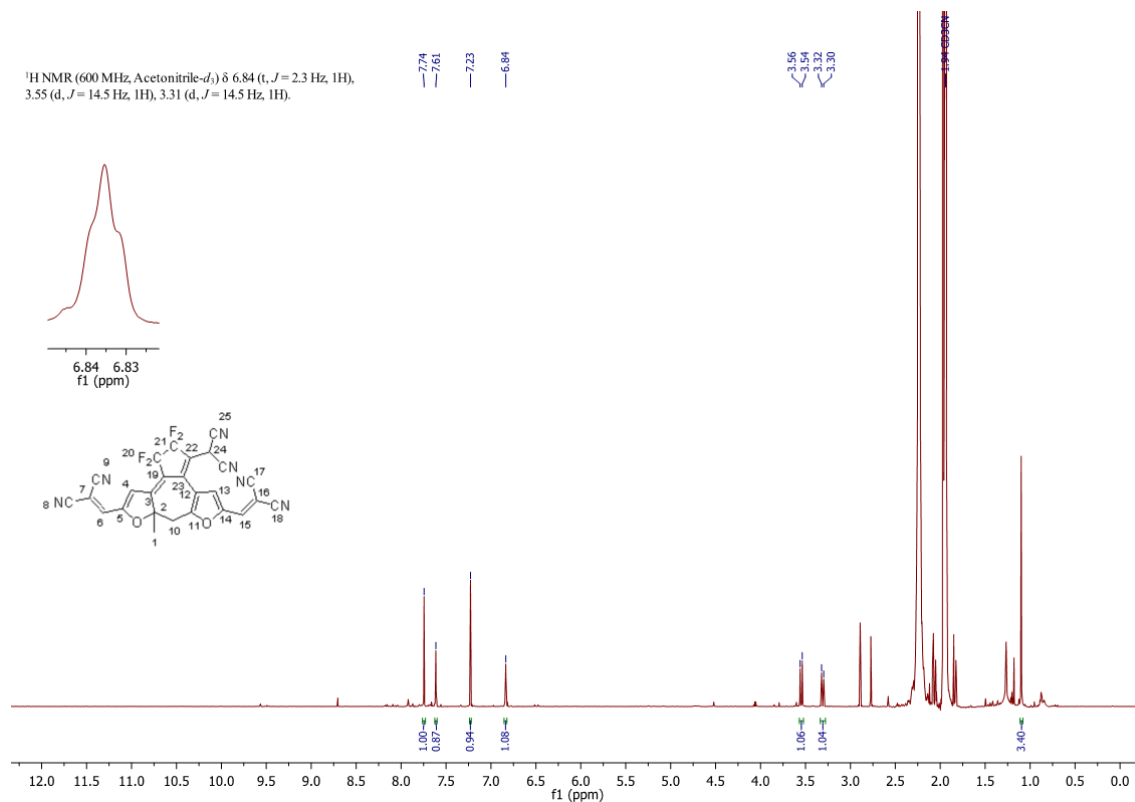

**Figure S48.**  $^1\text{H NMR}$  spectrum of 7-MN-MN (**8g**) in  $\text{CD}_3\text{CN}$ .

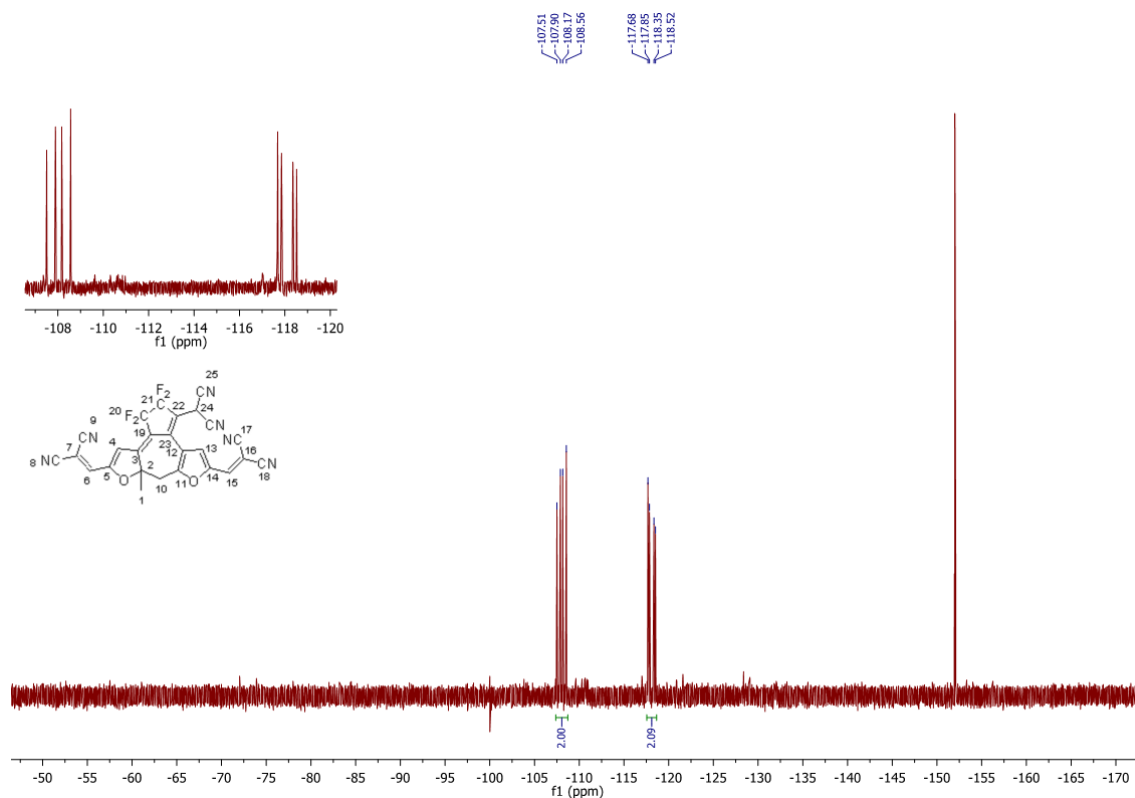

Figure S49.  $^{19}\text{F}$  NMR spectrum of 7-MN-MN (**8g**) in  $\text{CD}_3\text{CN}$ .

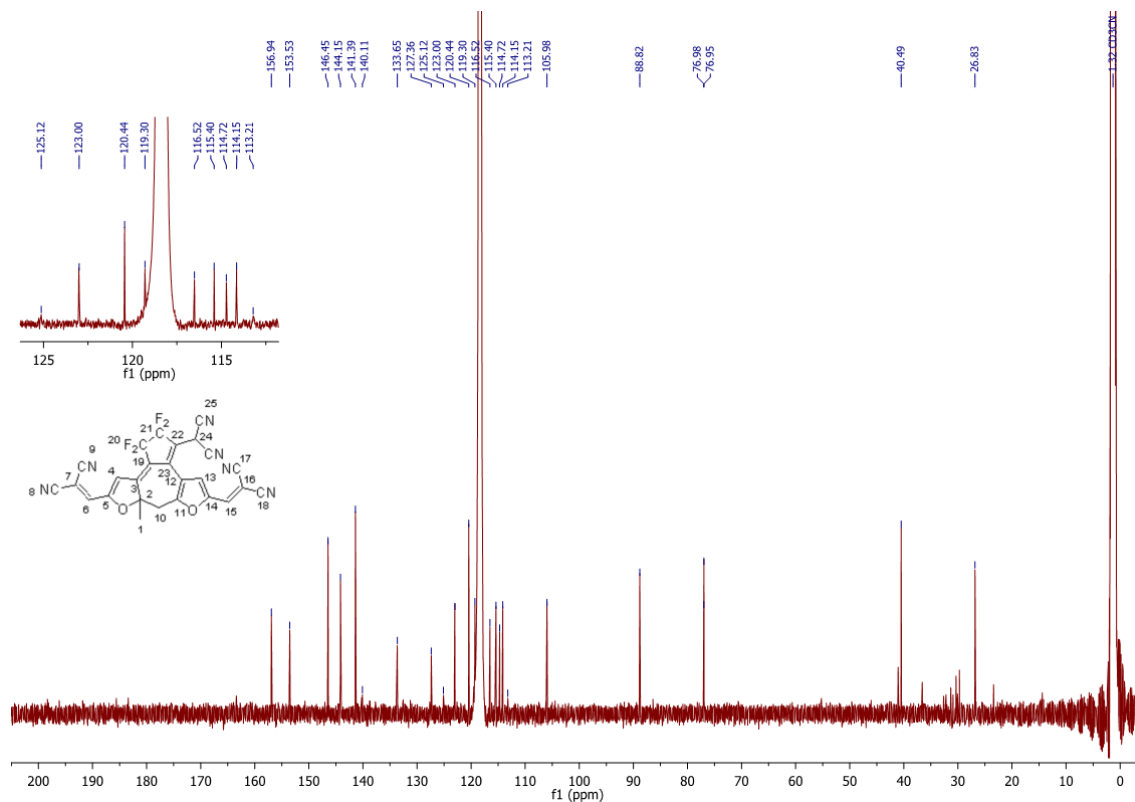

Figure S50.  $^{13}\text{C}$  NMR spectrum of 7-MN-MN (**8g**) in  $\text{CD}_3\text{CN}$ .

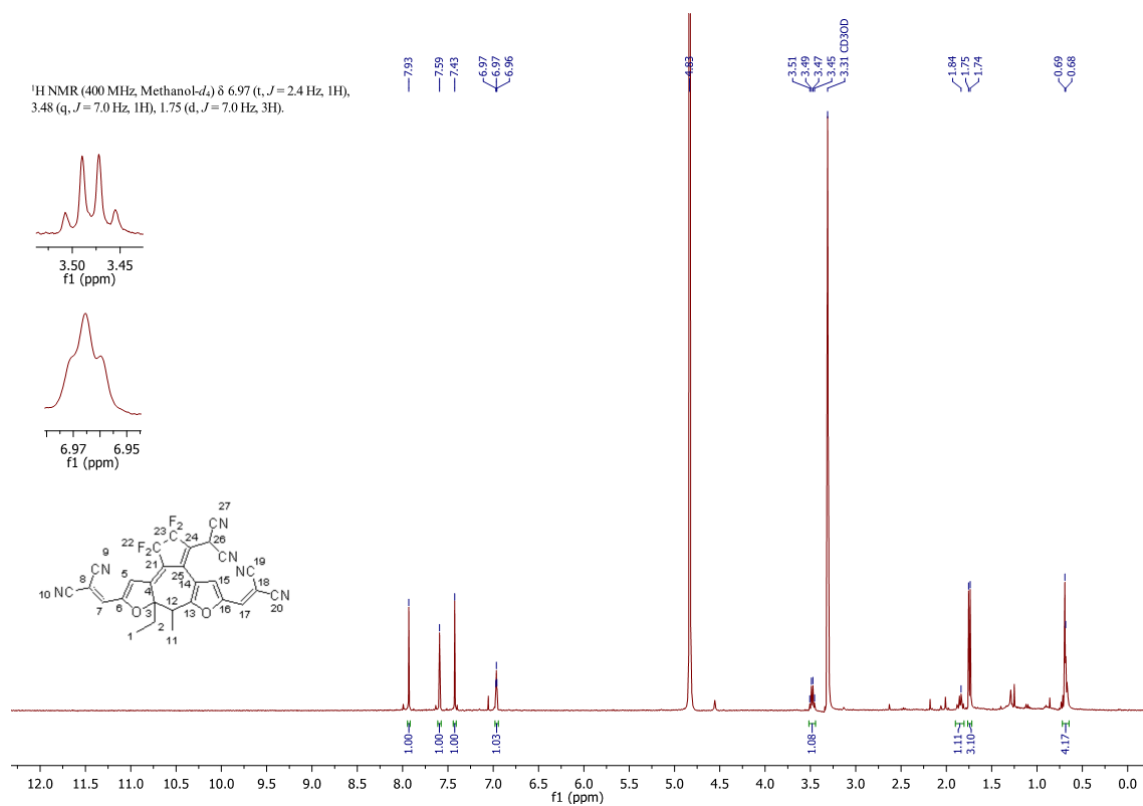

**Figure S51.** <sup>1</sup>H NMR spectrum of 7-Et-MN-MN (**8h**) in CD<sub>3</sub>OD.

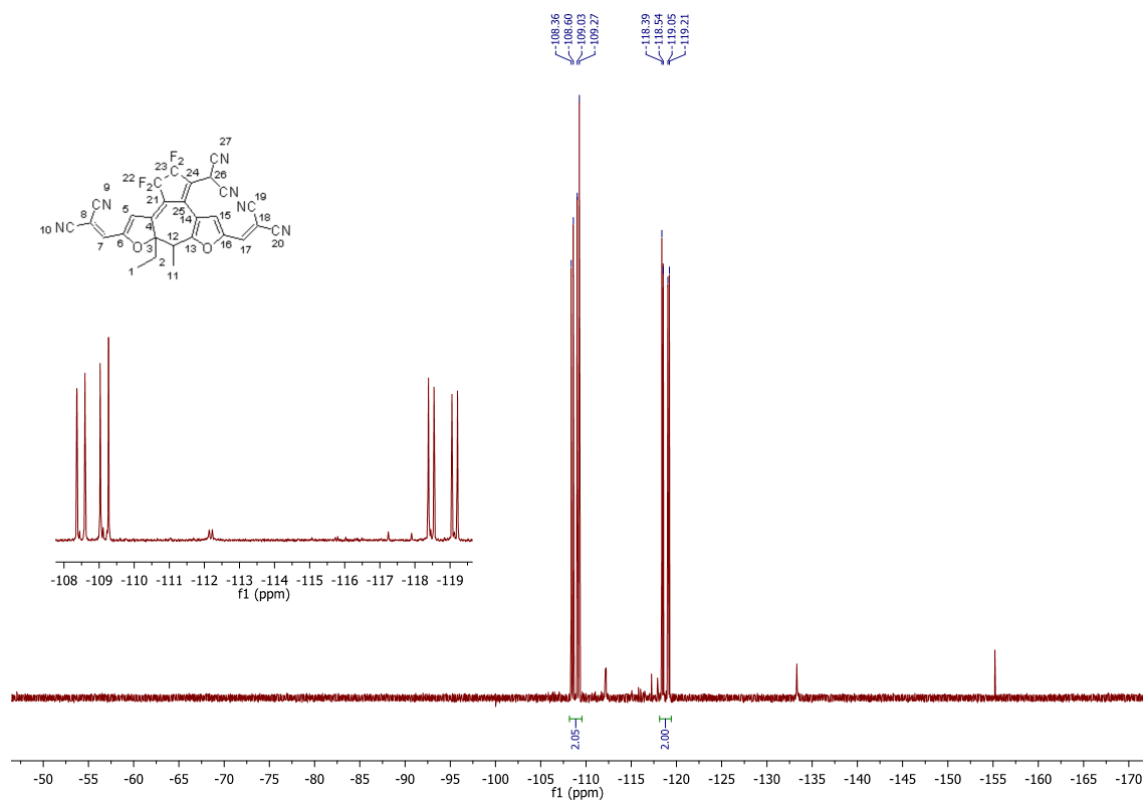

**Figure S52.** <sup>19</sup>F NMR spectrum of 7-Et-MN-MN (**8h**) in CD<sub>3</sub>OD.

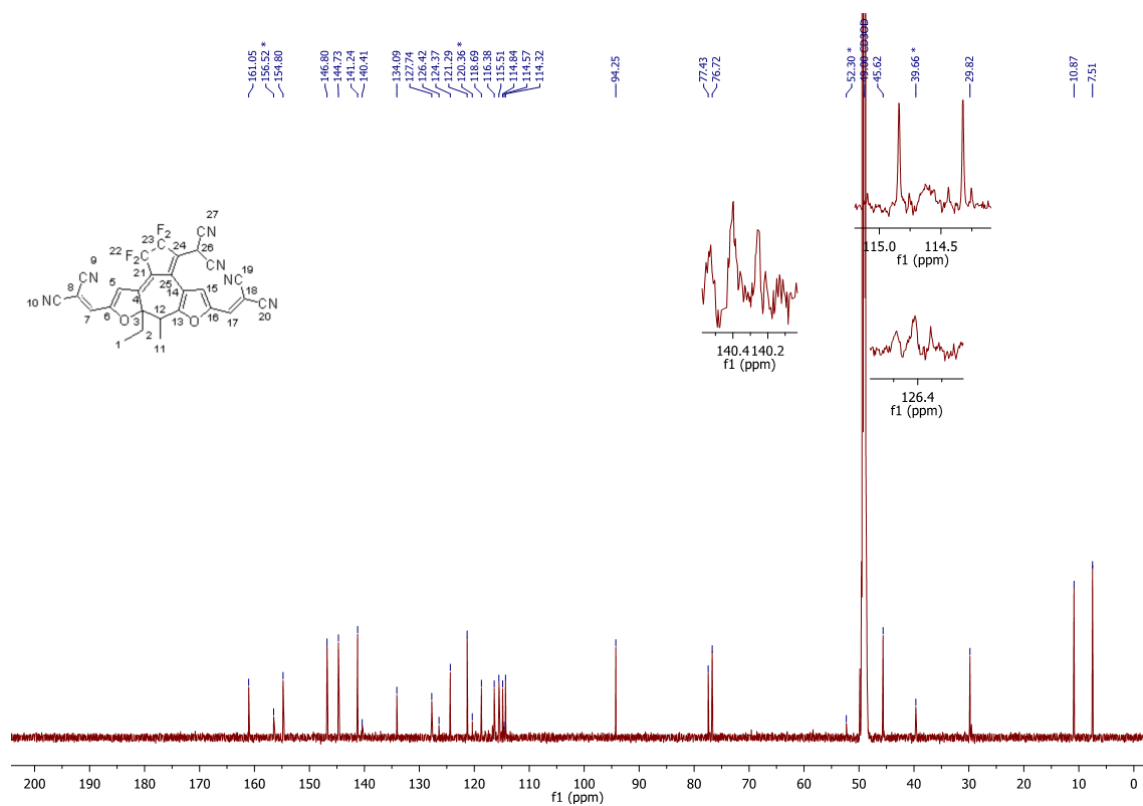

**Figure S53.**  $^{13}\text{C}$  NMR spectrum of 7-Et-MN-MN (**8h**) in  $\text{CD}_3\text{OD}$ .

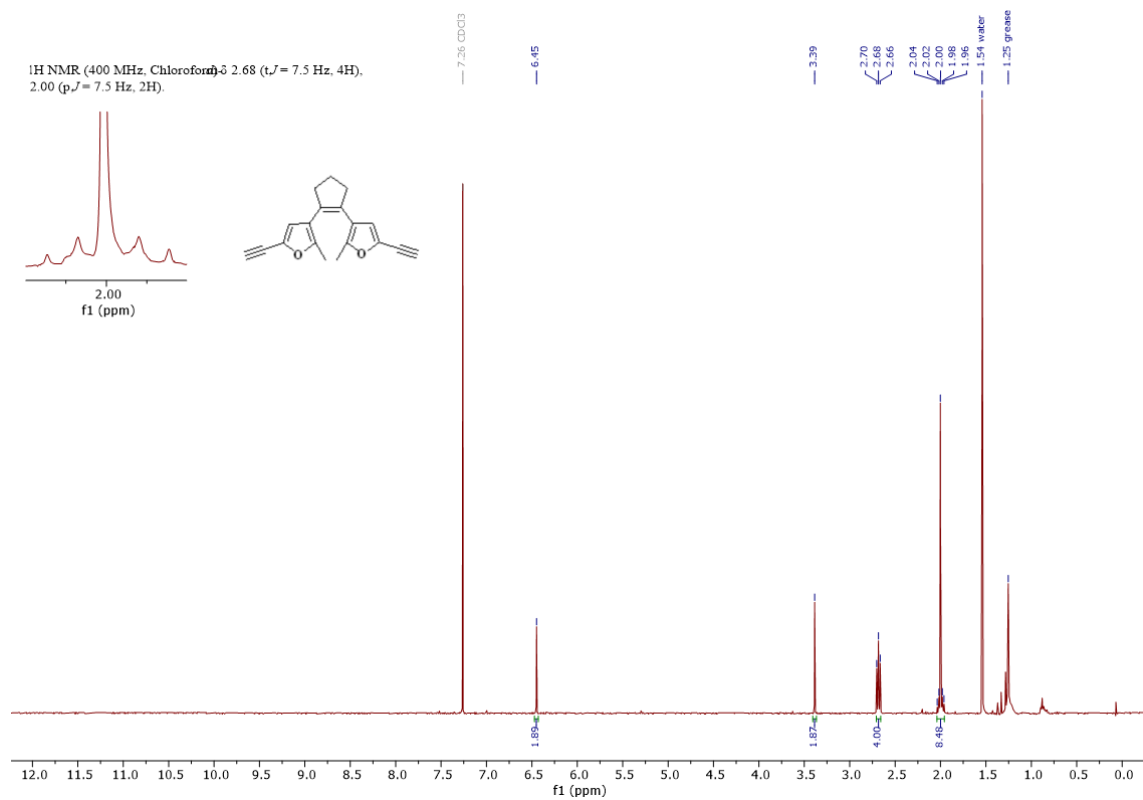

**Figure S54.**  $^1\text{H}$  NMR spectrum of C5H-yne (**19**) in  $\text{CDCl}_3$ .

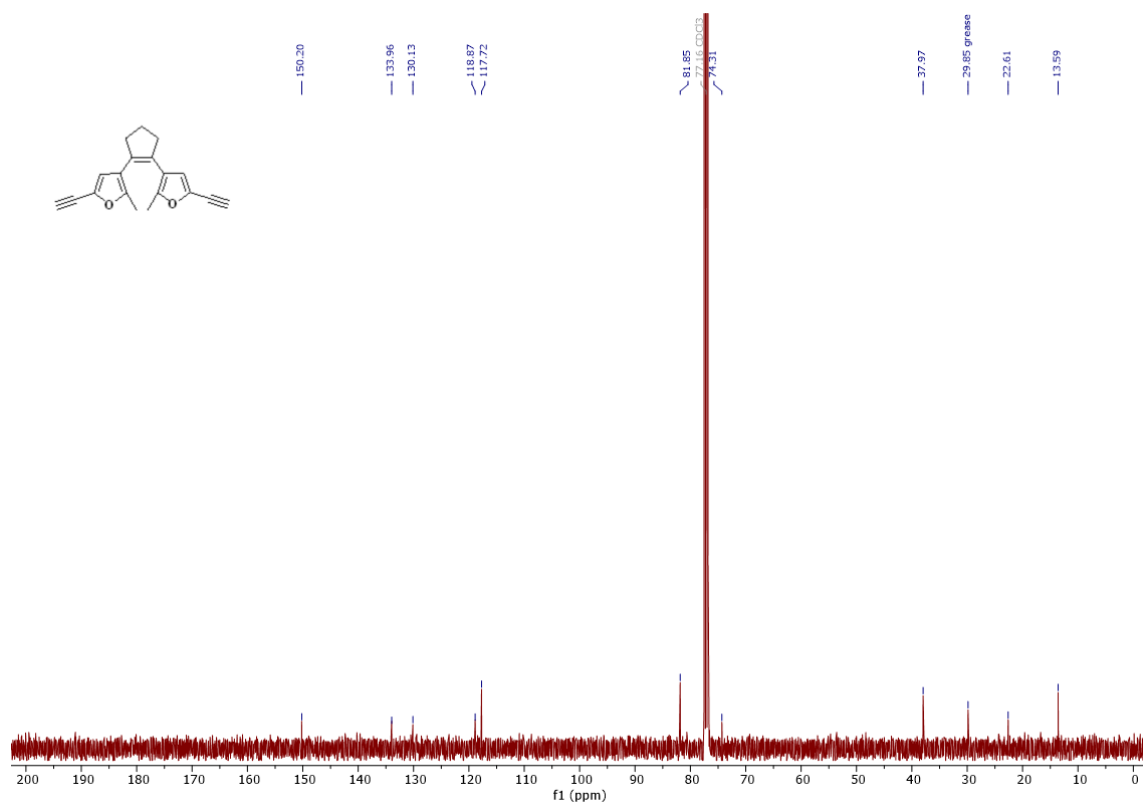

Figure S55.  $^{13}\text{C}$  NMR spectrum of C5H-yne (**19**) in  $\text{CDCl}_3$ .

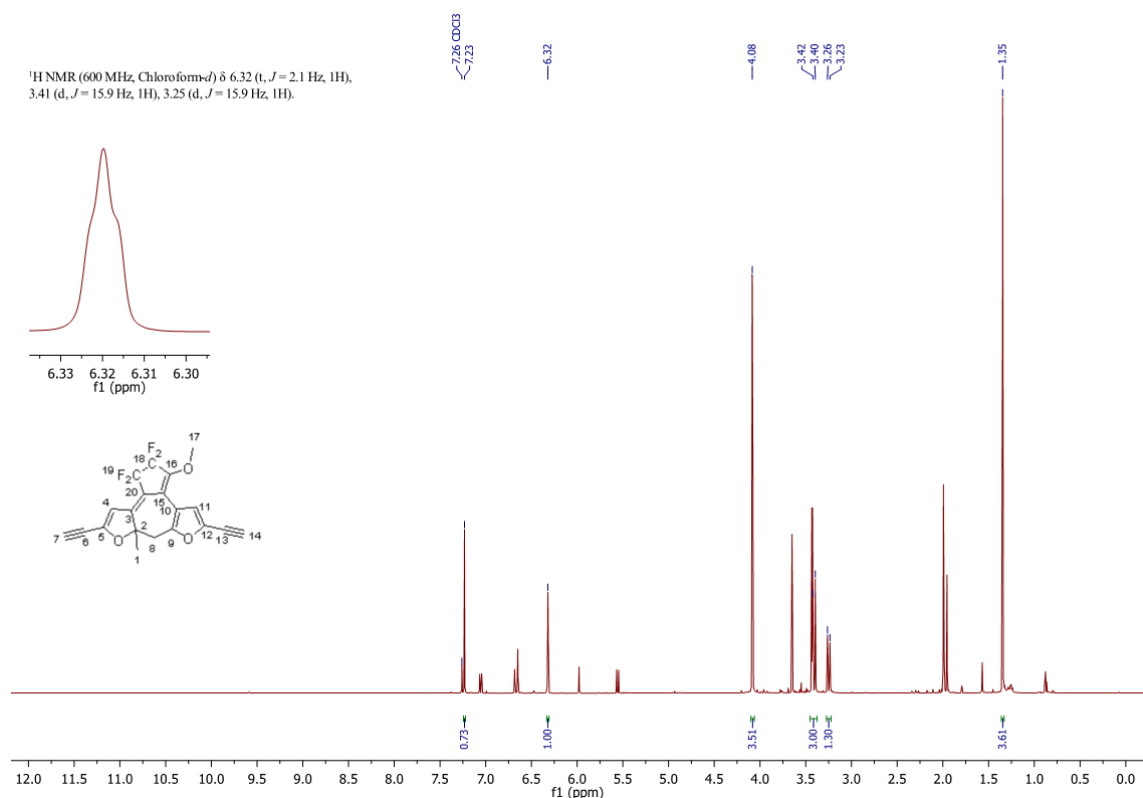

Figure S56.  $^1\text{H}$  NMR spectrum of 7-yne-OMe (**20**) in  $\text{CDCl}_3$  (only signals corresponding to **20** are marked).



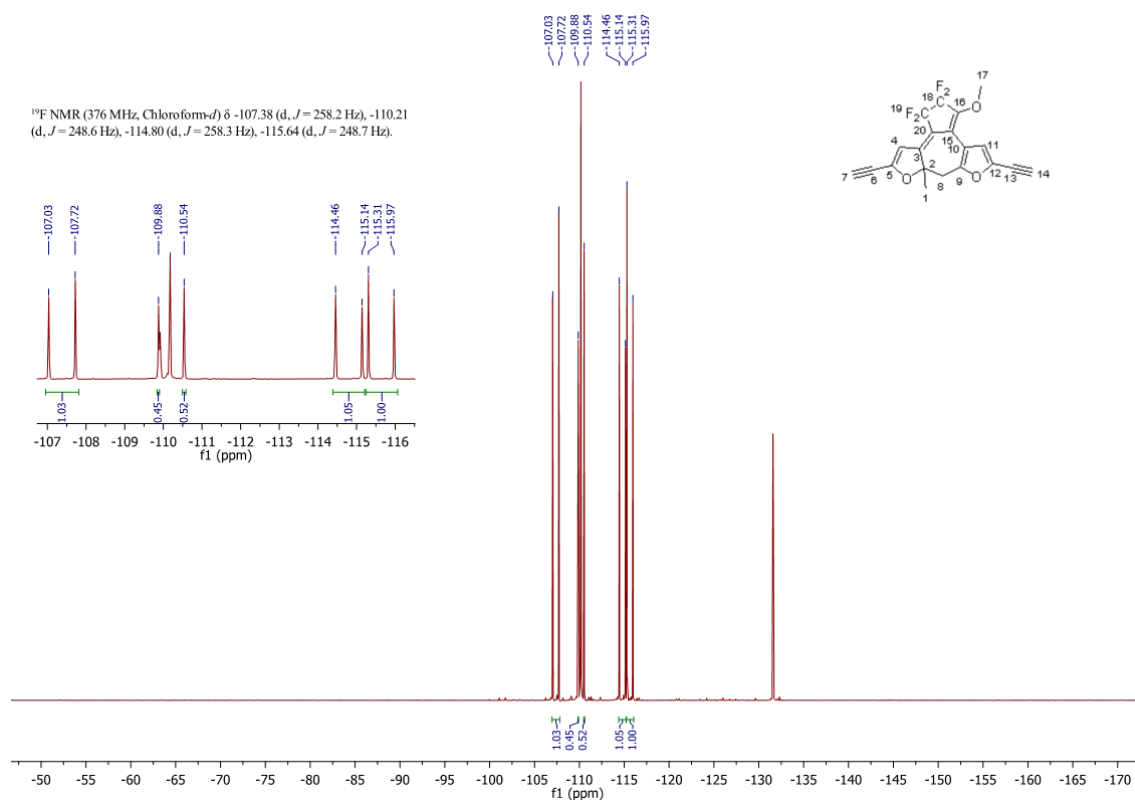

**Figure S57.** <sup>19</sup>F NMR spectrum of 7-yne-OMe (**20**) in CDCl<sub>3</sub> (only signals corresponding to **20** are marked).

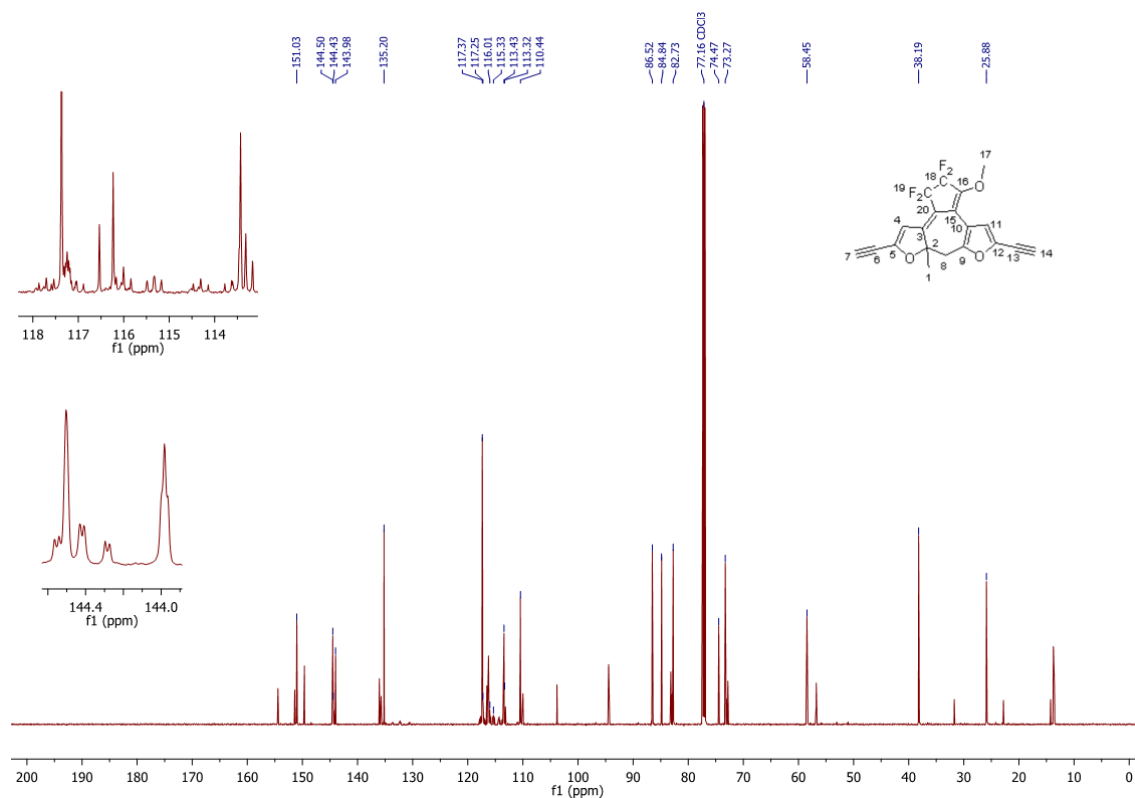

**Figure S58.** <sup>13</sup>C NMR spectrum of 7-yne-OMe (**20**) in CDCl<sub>3</sub> (only signals corresponding to **20** are marked).

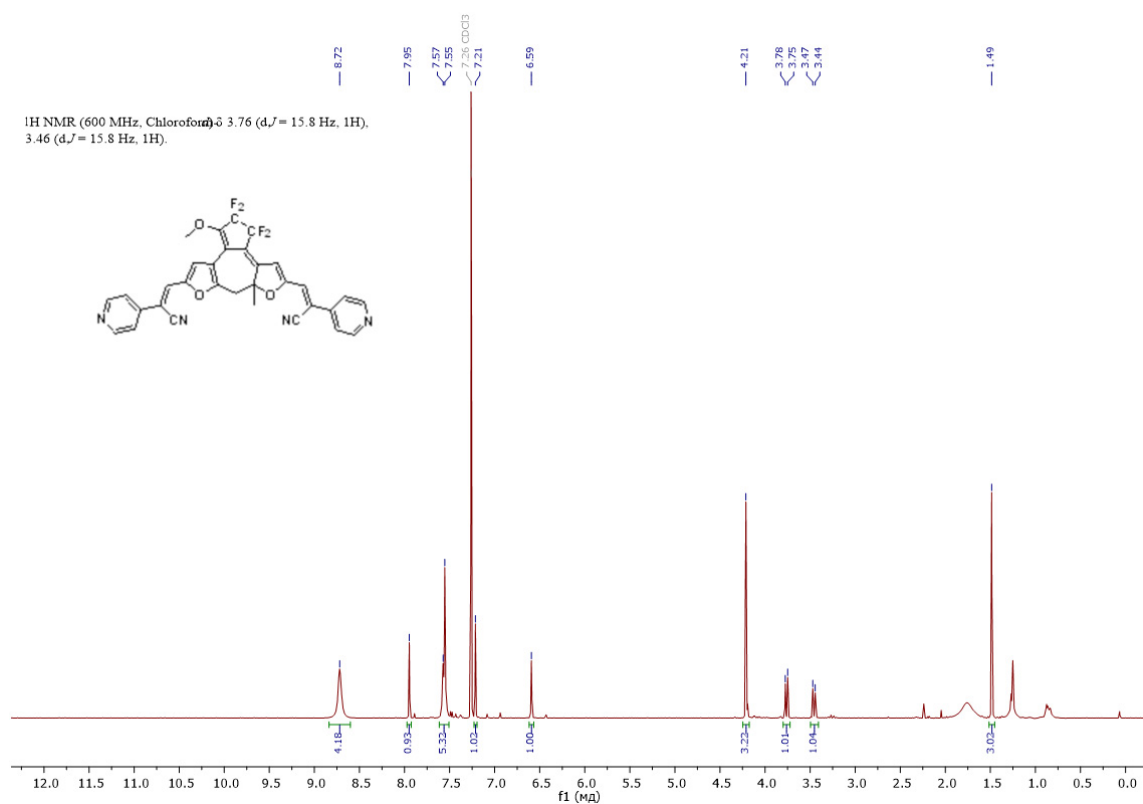

**Figure S59.** <sup>1</sup>H NMR spectrum of 7-MN-4PyOMe (17) in CDCl<sub>3</sub>.

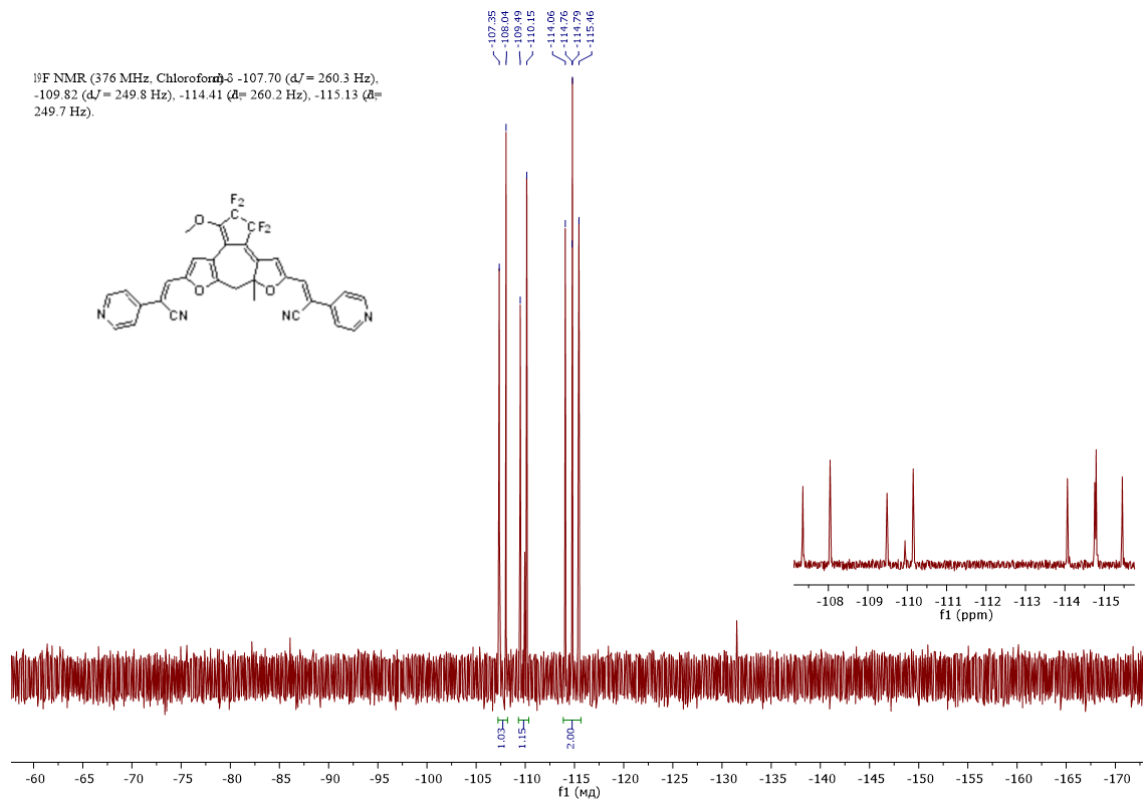

**Figure S60.** <sup>19</sup>F NMR spectrum of 7-MN-4PyOMe (17) in CDCl<sub>3</sub>.

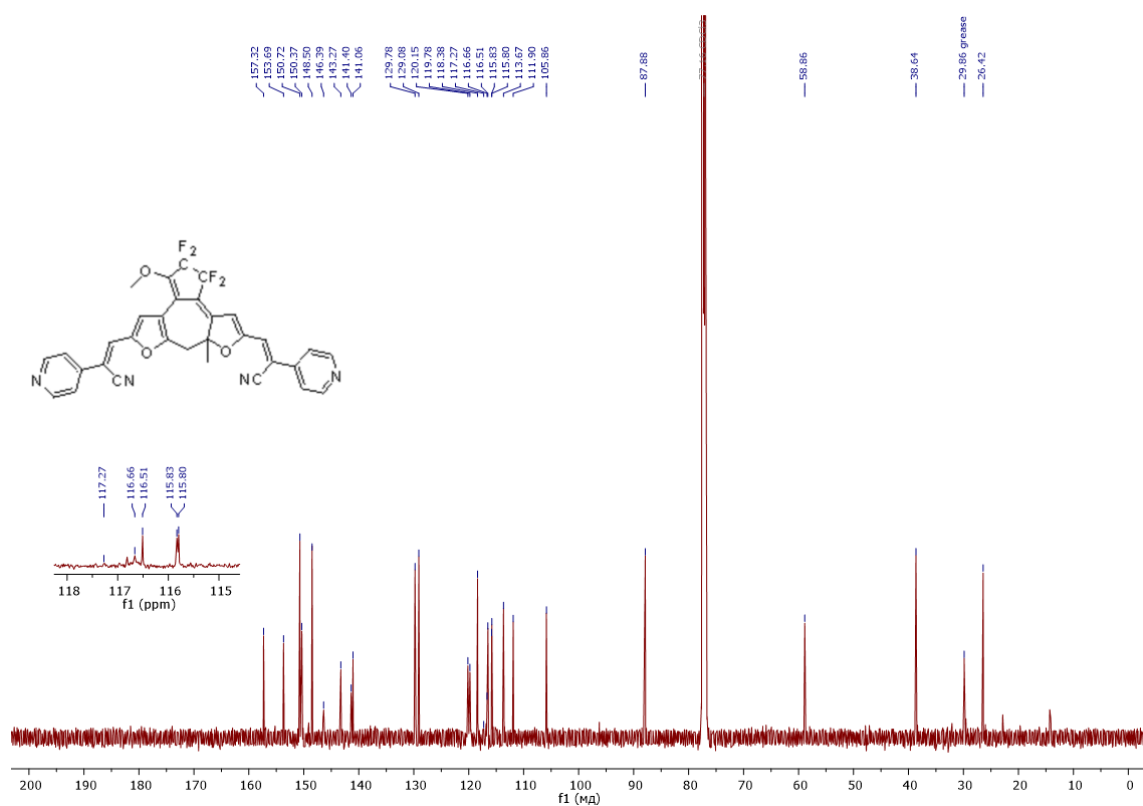

Figure S61.  $^{13}\text{C}$  NMR spectrum of 7-MN-4PyOMe (**17**) in  $\text{CDCl}_3$ .

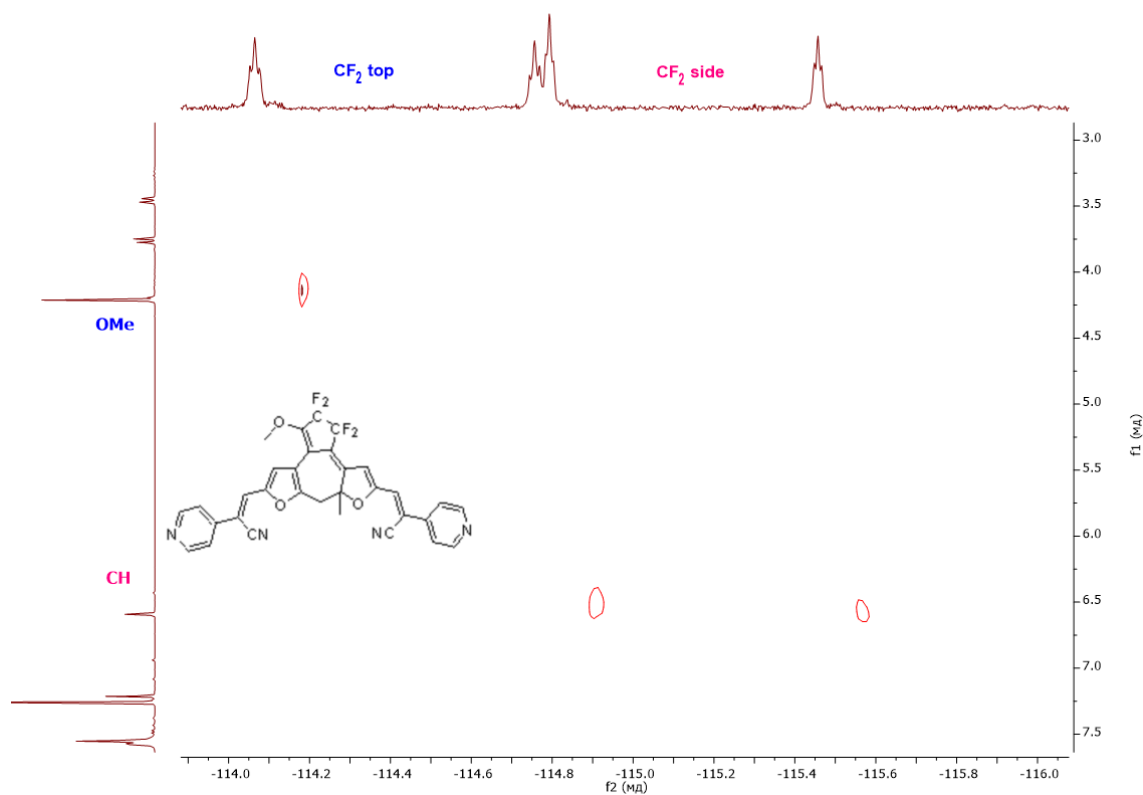

Figure S62.  $\{^1\text{H}, ^{19}\text{F}\}$ -HOESY spectrum of 7-MN-4PyOMe (**17**) in  $\text{CDCl}_3$ .

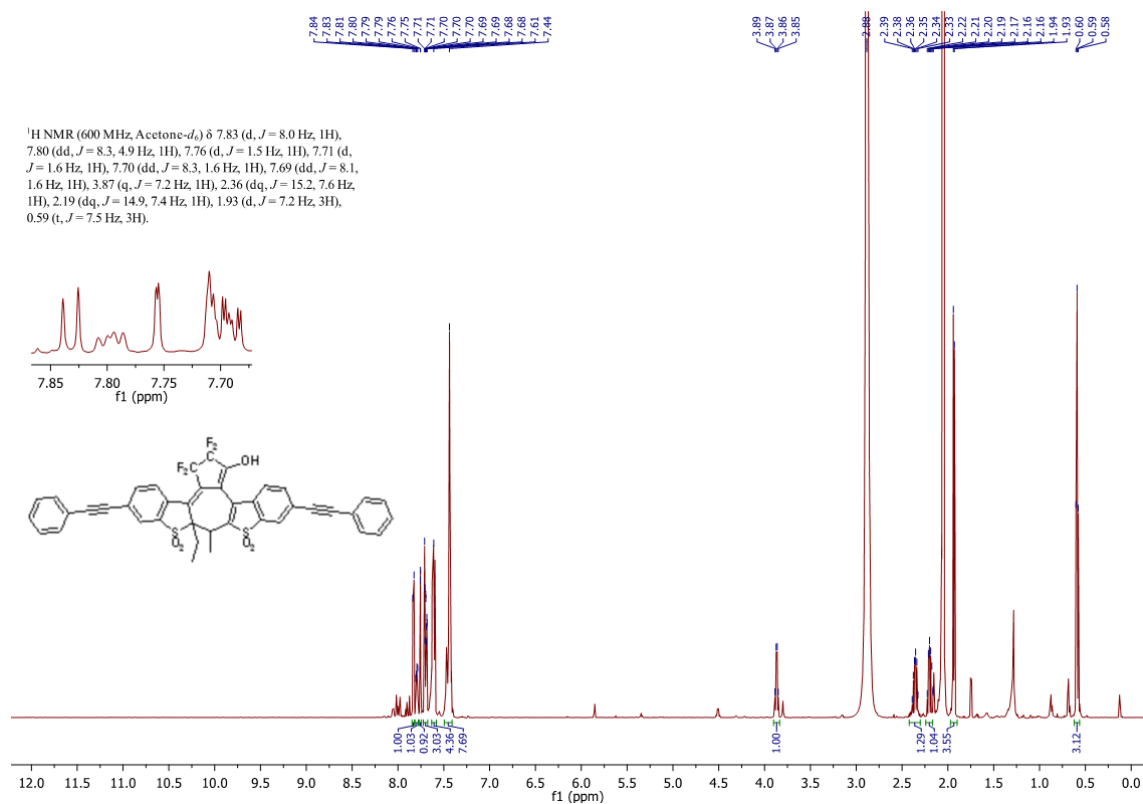

**Figure S63.** <sup>1</sup>H NMR spectrum of 7-BTSO<sub>2</sub>Et-PhCC-OH (**22**) in acetone-*d*<sub>6</sub>.

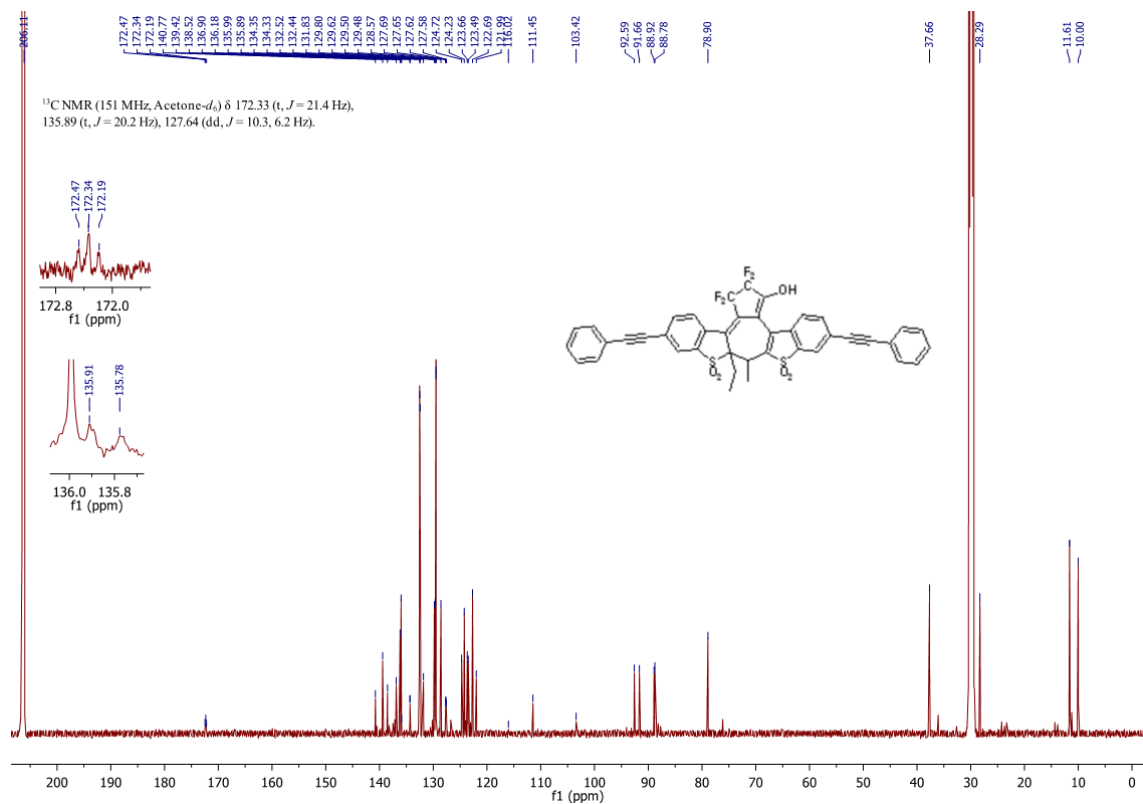

**Figure S64.** <sup>13</sup>C NMR spectrum of 7-BTSO<sub>2</sub>Et-PhCC-OH (**22**) in acetone-*d*<sub>6</sub>.

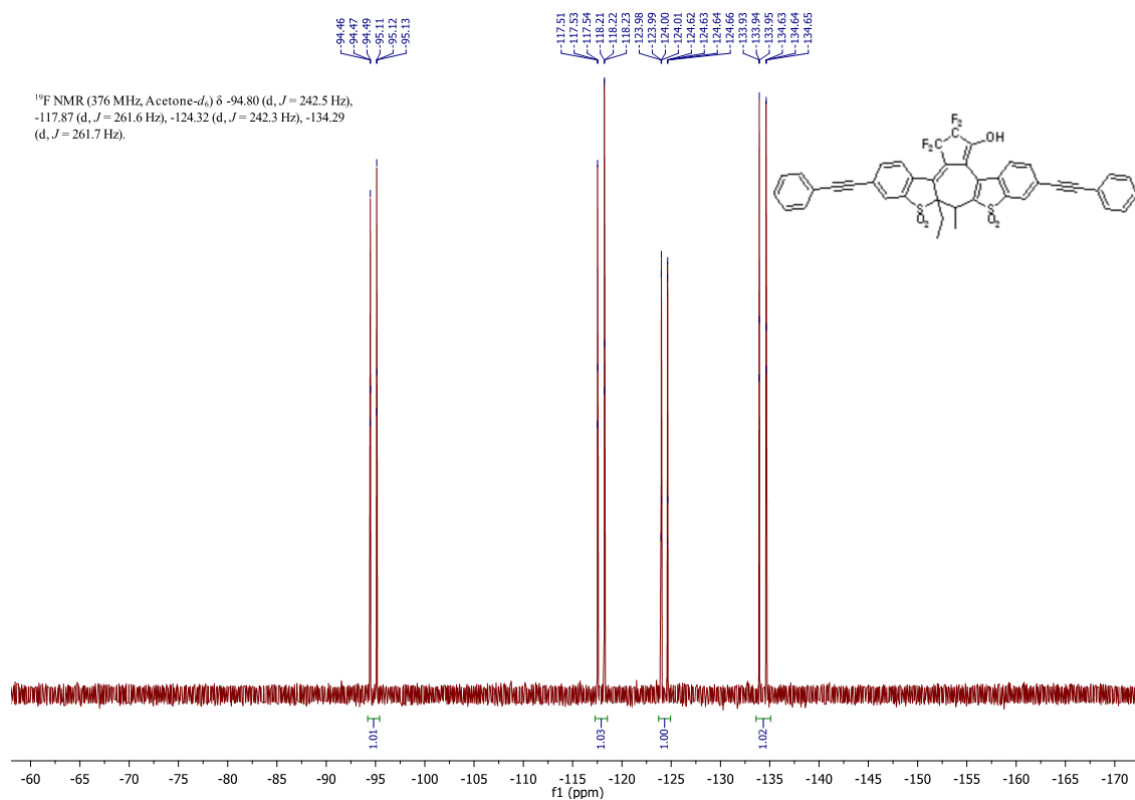

**Figure S65.** <sup>19</sup>F NMR spectrum of 7-BTSO<sub>2</sub>Et-PhCC-OH (**22**) in acetone-*d*<sub>6</sub>.

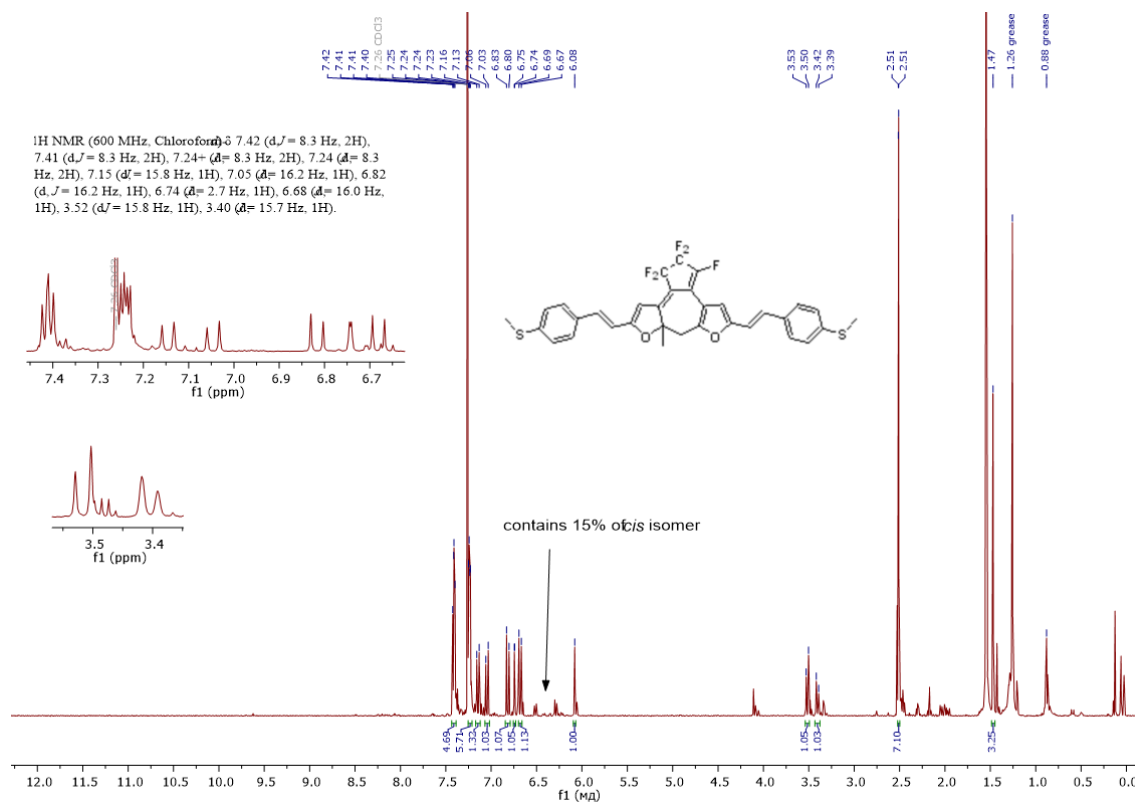

**Figure S66.** <sup>1</sup>H NMR spectrum of 7-4SMe (**23**) in CDCl<sub>3</sub>.

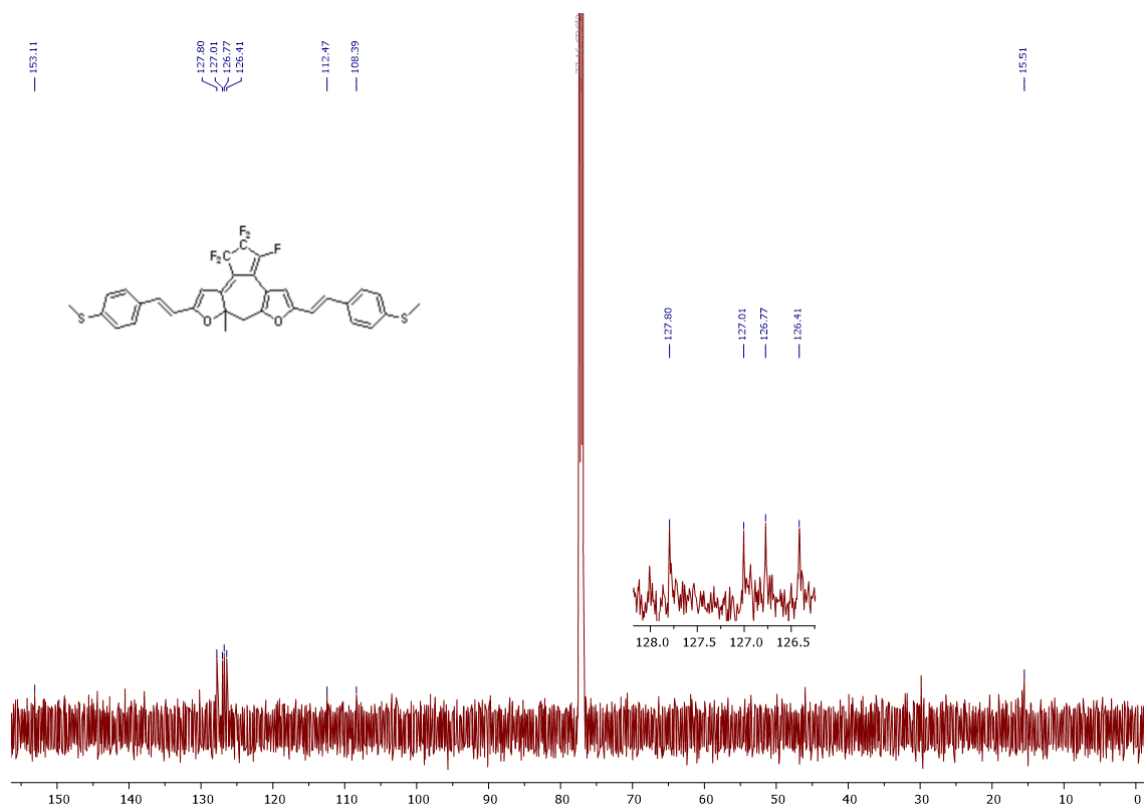

Figure S67. <sup>13</sup>C NMR spectrum of 7-4SMe (23) in CDCl<sub>3</sub>.

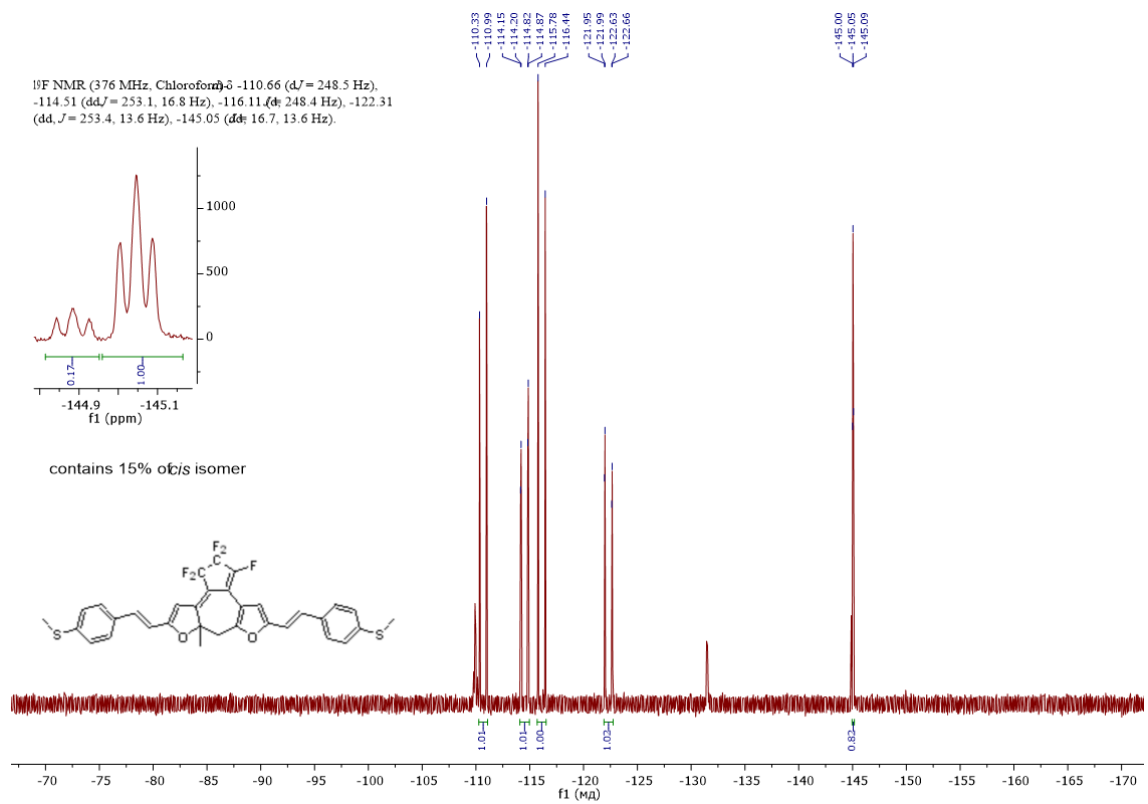

Figure S68. <sup>19</sup>F NMR spectrum of 7-4SMe (23) in CDCl<sub>3</sub>.

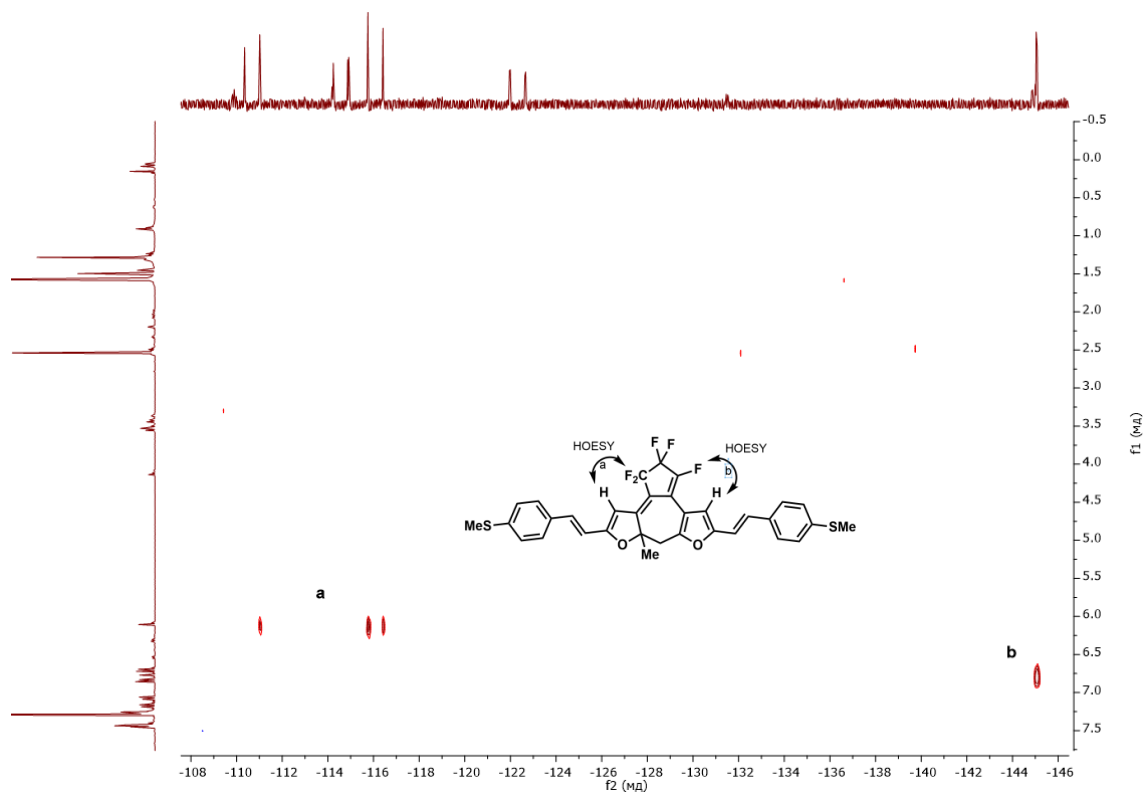

Figure S69.  $\{^1\text{H}, ^{19}\text{F}\}$ -HOESY spectrum of 7-4SMe (**23**) in  $\text{CDCl}_3$ .

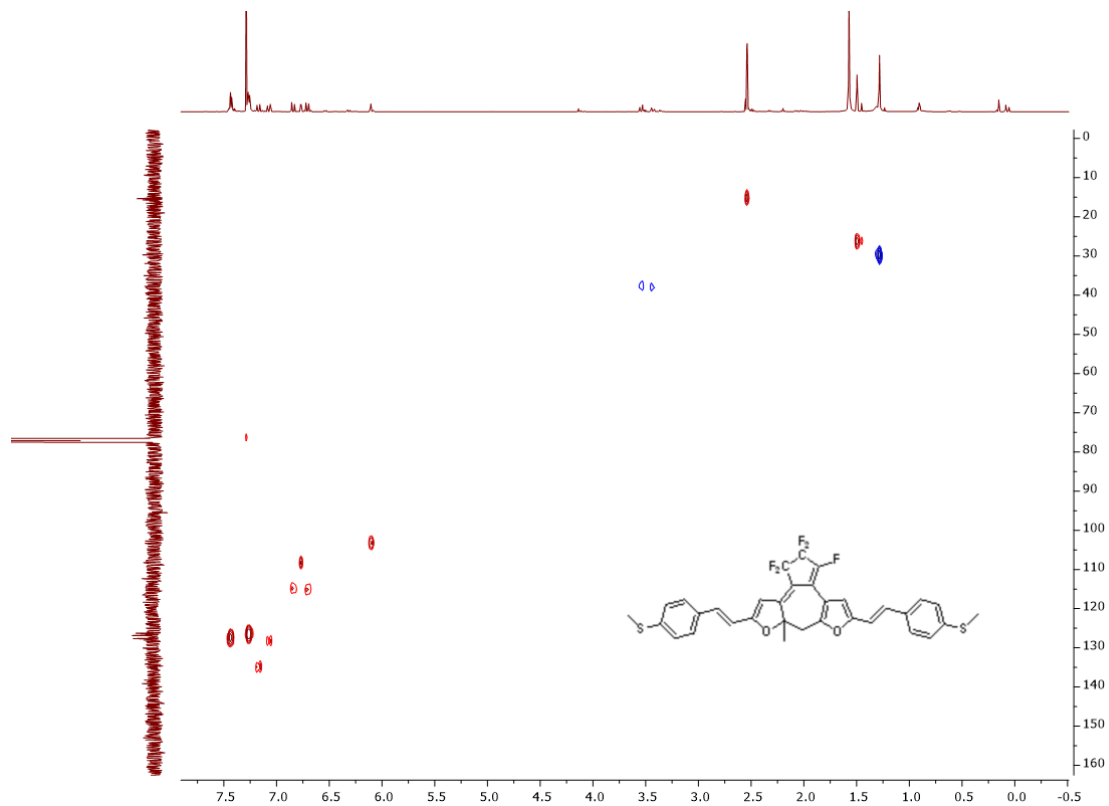

Figure S70. HSQC spectrum of 7-4SMe (**23**) in  $\text{CDCl}_3$ .

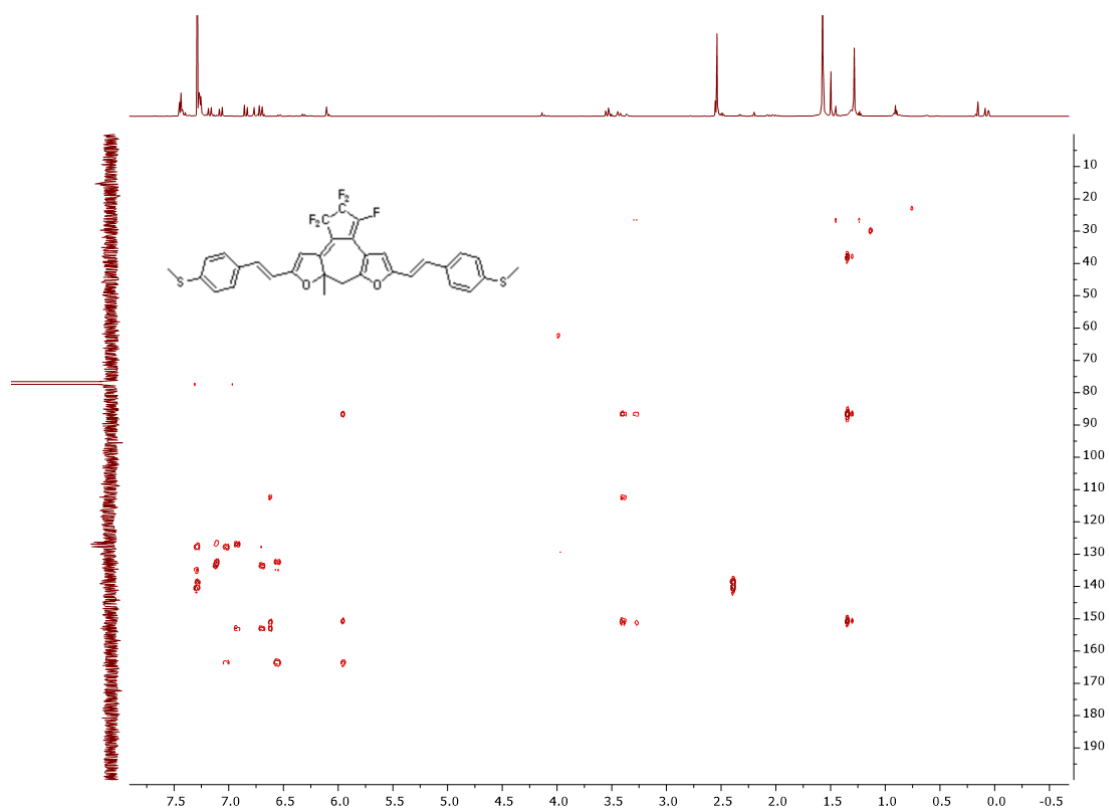

Figure S71. HMBC spectrum of 7-4SMe (**23**) in CDCl<sub>3</sub>.

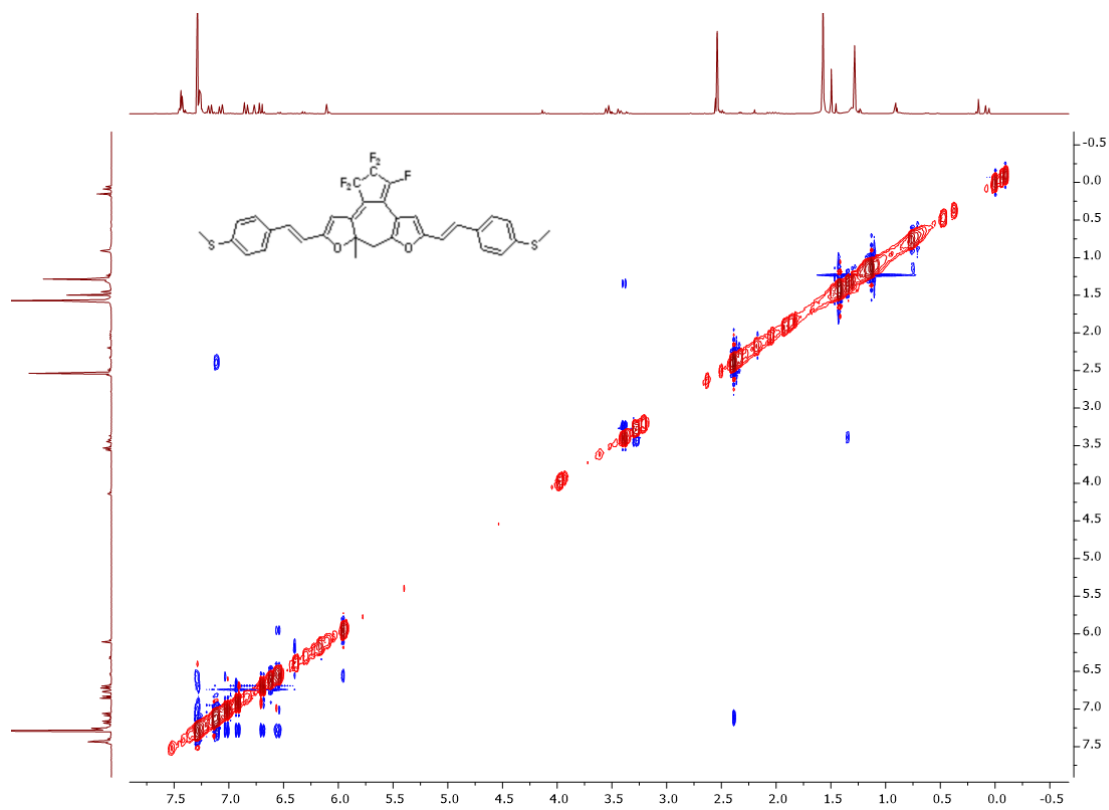

Figure S72. NOESY spectrum of 7-4SMe (**23**) in CDCl<sub>3</sub>.



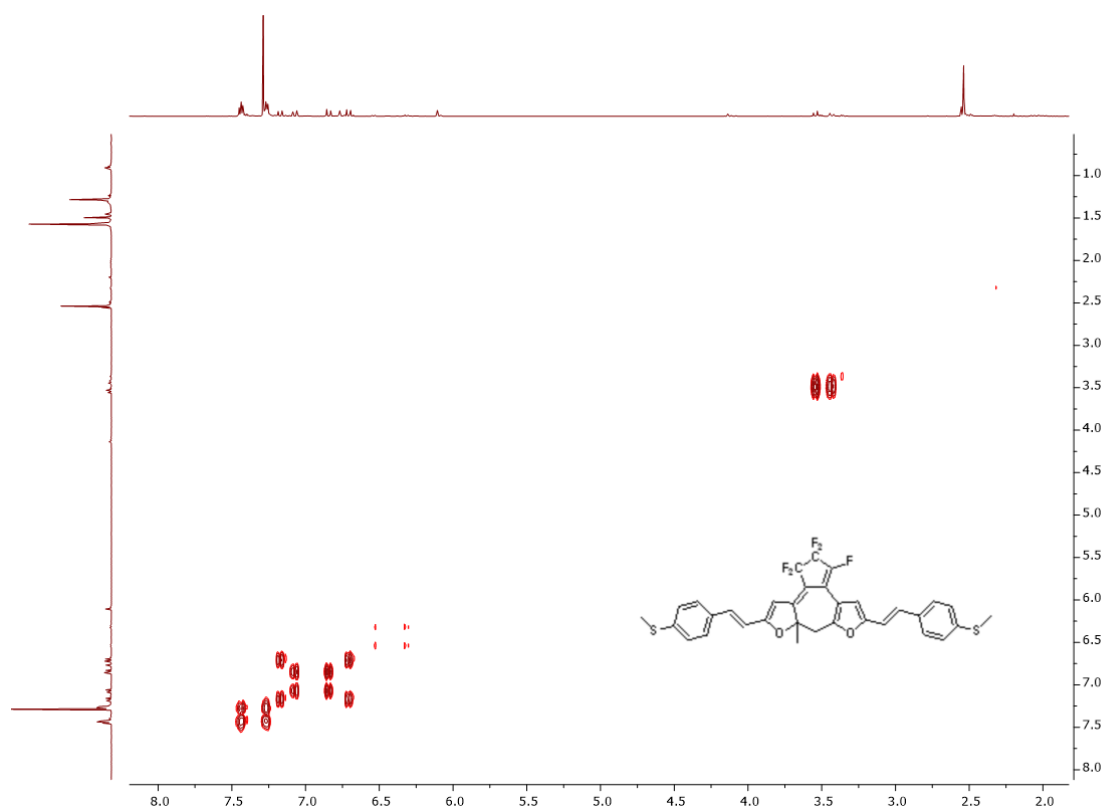

**Figure S73.** COSY spectrum of 7-4SMe (**23**) in  $\text{CDCl}_3$ .

## (E) References

- [1] S.-Z. Pu, T.-S. Yang, R.-J. Wang, J.-K. Xu, *Acta Crystallogr., Sect. E: Struct. Rep. Online* **2005**, *61*, o4077-o4079.
- [2] D. Sysoiev, A. Fedoseev, Y. Kim, T. E. Exner, J. Boneberg, T. Huhn, P. Leiderer, E. Scheer, U. Groth, U. E. Steiner, *Chem. Eur. J.* **2011**, *17*, 6663-6672.
- [3] S. Wang, Y. Zhou, L. Zhu, J. Zhang, Q. Zou, T. Zeng, W. Chen, *Chem. Commun.* **2017**, *53*, 9570-9573.
- [4] Y. Kim, T. J. Hellmuth, D. Sysoiev, F. Pauly, T. Pietsch, J. Wolf, A. Erbe, T. Huhn, U. Groth, U. E. Steiner, E. Scheer, *Nano Lett.* **2012**, *12*, 3736-3742.
- [5] Stoe & Cie GmbH, *IPDS-Software, Darmstadt, Germany* **2002**.
- [6] G. M. Sheldrick, *Acta Crystallogr., Sect. A: Found. Crystallogr.* **2008**, *64*, 112–122.
- [7] L. J. Farrugia, *J. Appl. Crystallogr.* **2012**, *45*, 849–854.
- [8] H. Haarmann, W. Eberbach *Tetrahedron Lett.* **1991**, *32*, 903-906.
